# Supplementary material for: Prediction and analysis of tumor infiltrating lymphocytes across 28 cancers by TILScout using deep learning
Source: Springer Nature journal article supplement (doi:10.1038/s41698-025-00866-0), 2025-03-19
Supplement: MOESM1 [file 41698_2025_866_MOESM1_ESM.pdf]

## Supplementary Material

### Supplementary data 1. Abbreviations of TCGA cancer types in this study

**ACC** Adrenocortical carcinoma  
**BLCA** Bladder urothelial carcinoma  
**BRCA** Breast invasive carcinoma  
**CESC** Cervical squamous cell carcinoma and endocervical adenocarcinoma  
**CHOL** Cholangiocarcinoma  
**COAD\_READ** Colon adenocarcinoma and rectum adenocarcinoma  
**ESCA** Esophageal carcinoma  
**HNSC** Head and Neck squamous cell carcinoma  
**KICH** Kidney Chromophobe  
**KIRC** Kidney renal clear cell carcinoma  
**KIRP** Kidney renal papillary cell carcinoma  
**LIHC** Liver hepatocellular carcinoma  
**LUAD** Lung adenocarcinoma  
**LUSC** Lung squamous cell carcinoma  
**MESO** Mesothelioma  
**OV** Ovarian serous cystadenocarcinoma  
**PAAD** Pancreatic adenocarcinoma  
**PCPG** Pheochromocytoma and Paraganglioma  
**PRAD** Prostate adenocarcinoma  
**SARC** Sarcoma  
**SKCM** Skin Cutaneous Melanoma  
**STAD** Stomach adenocarcinoma  
**TGCT** Testicular Germ Cell Tumors  
**THCA** Thyroid carcinoma  
**THYM** Thymoma  
**UCEC** Uterine Corpus Endometrial Carcinoma  
**UCS** Uterine Carcinosarcoma  
**UVM** Uveal Melanoma

### Supplementary Data 2. Patch Counts Based on WSIs across different cancer types

### Supplementary Data 3. GSEA results

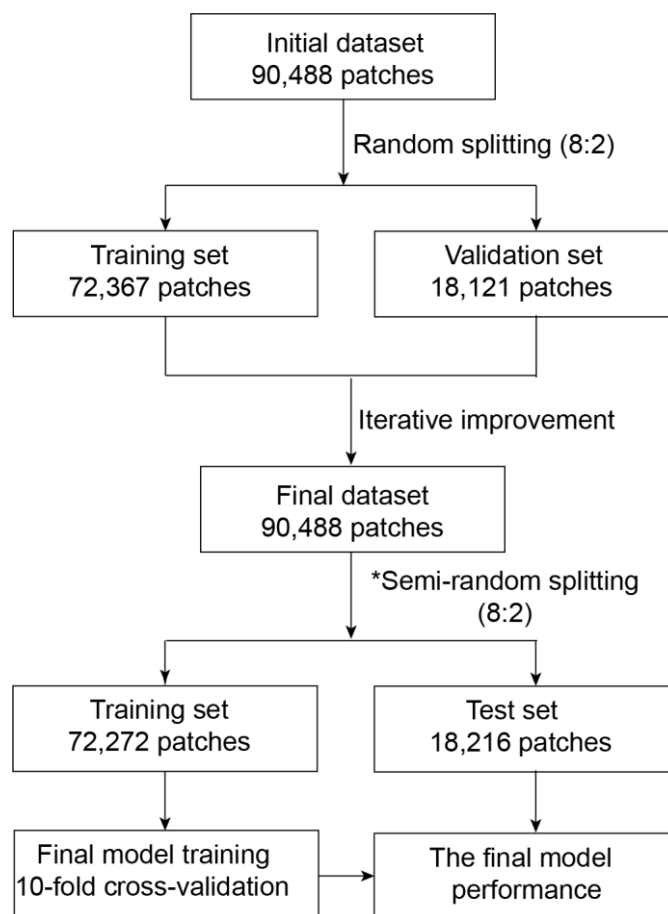

**Supplementary Figure 1. Dataset generation process for model training**

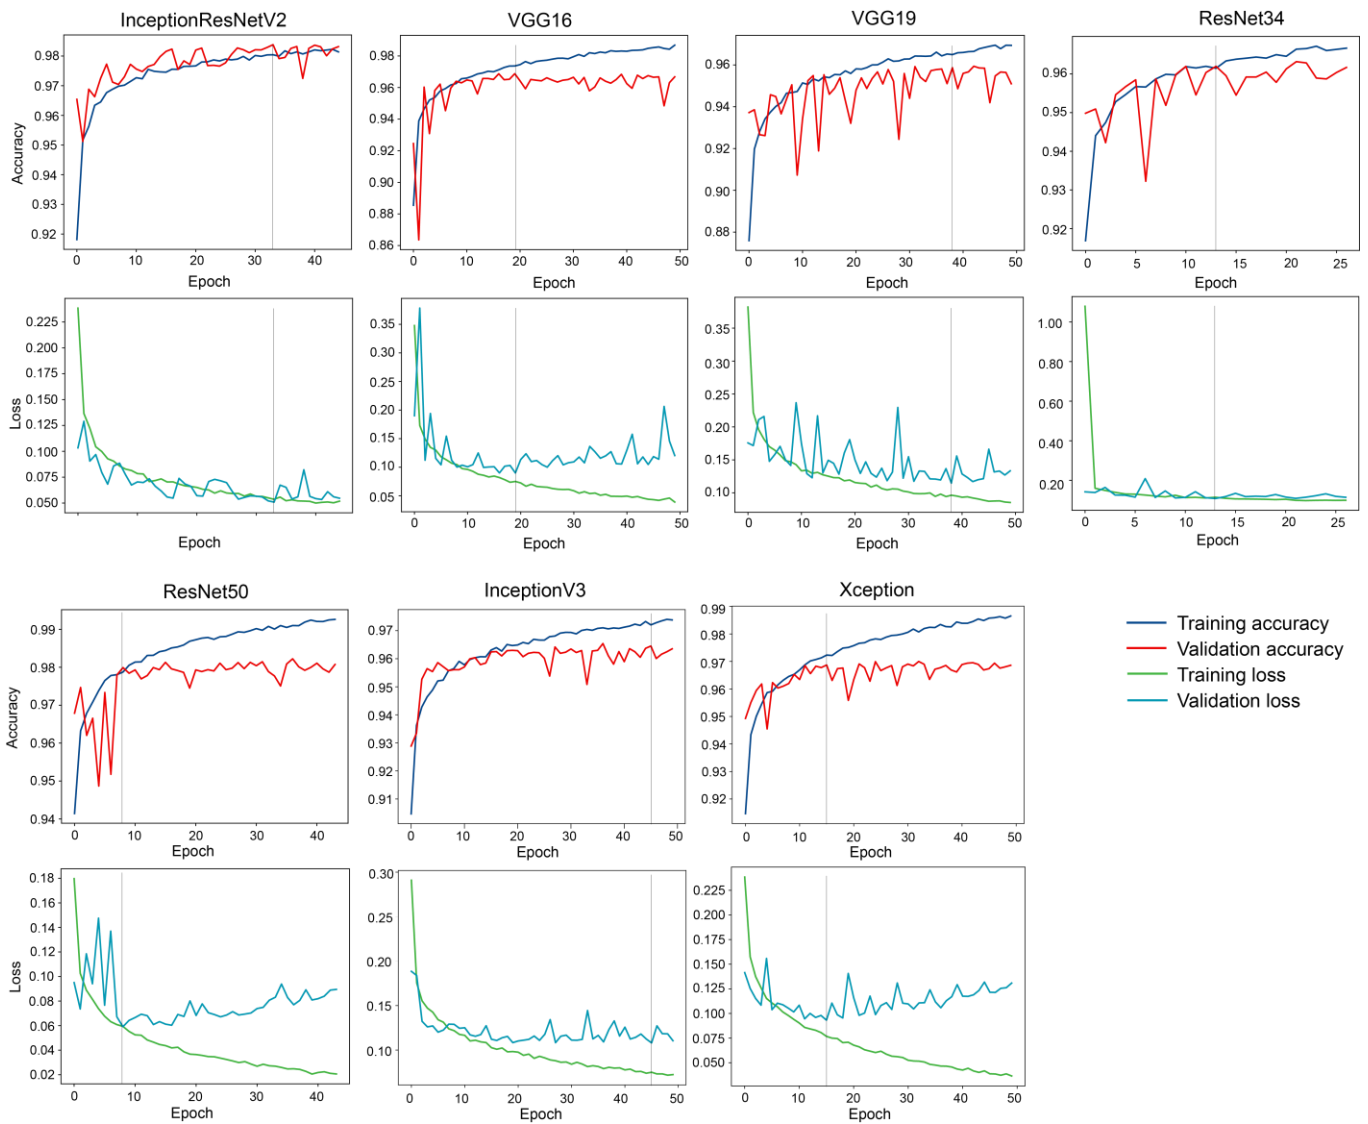

**Supplementary Figure 2. Model performances of 7 convolutional neural networks during model training.** The vertical solid line represents the position corresponding to the highest accuracy and lowest loss value of a model on the validation set and also represents the final performance of this model on the validation set.

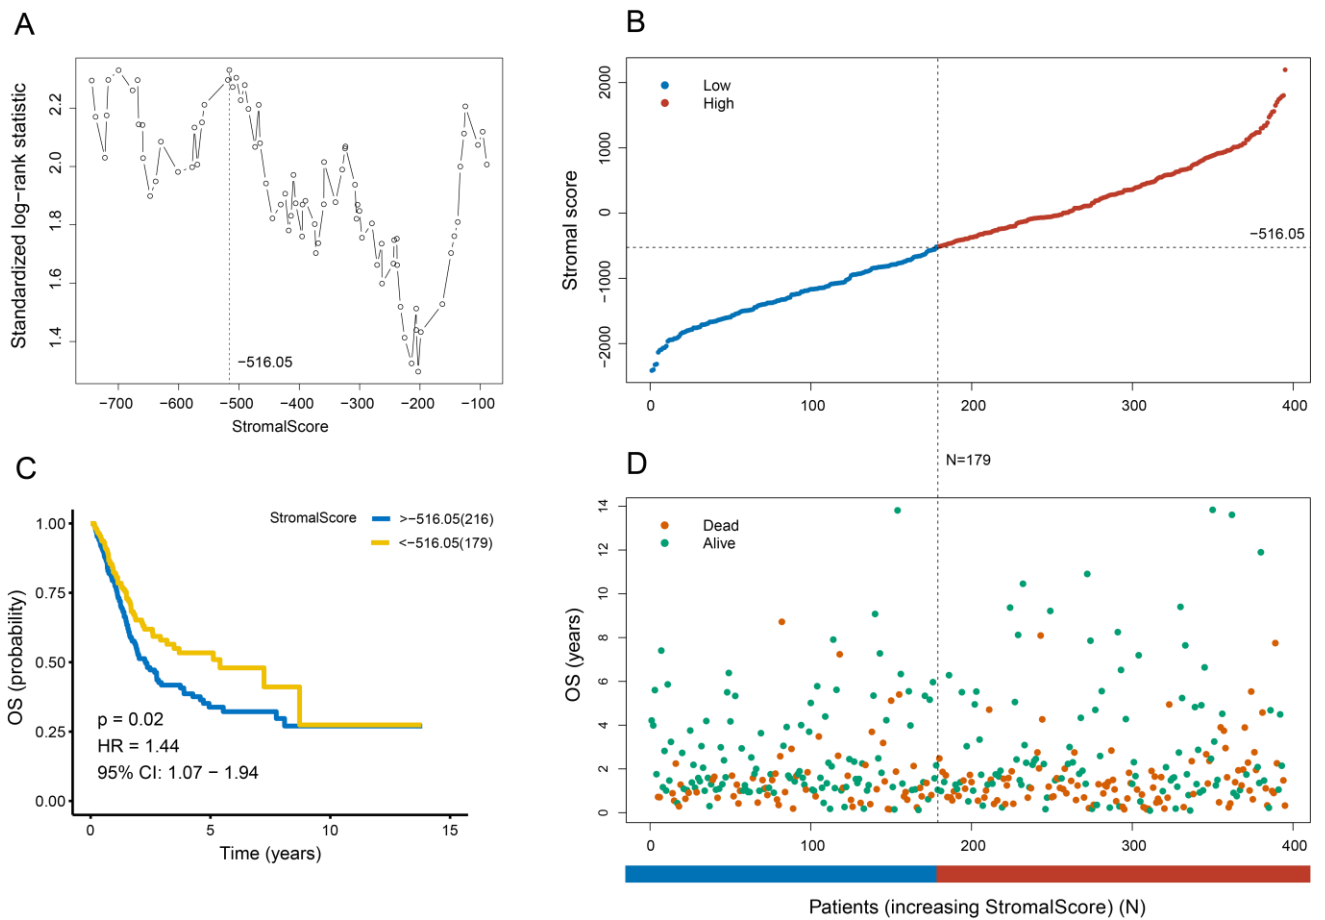

**Supplementary Figure 3. An example of sample grouping for differential expression analysis in BLCA based on OS.** A, the optimal cut-off point selection of stromal scores according to maximally selected rank statistics. B, corresponding sample sizes of the low- and high-score groups based on the optimal cut-off point. C, survival curves of two groups based on the optimal cut-off point. D, outcome distributions of two groups based on the optimal cut-off point.

BLCA

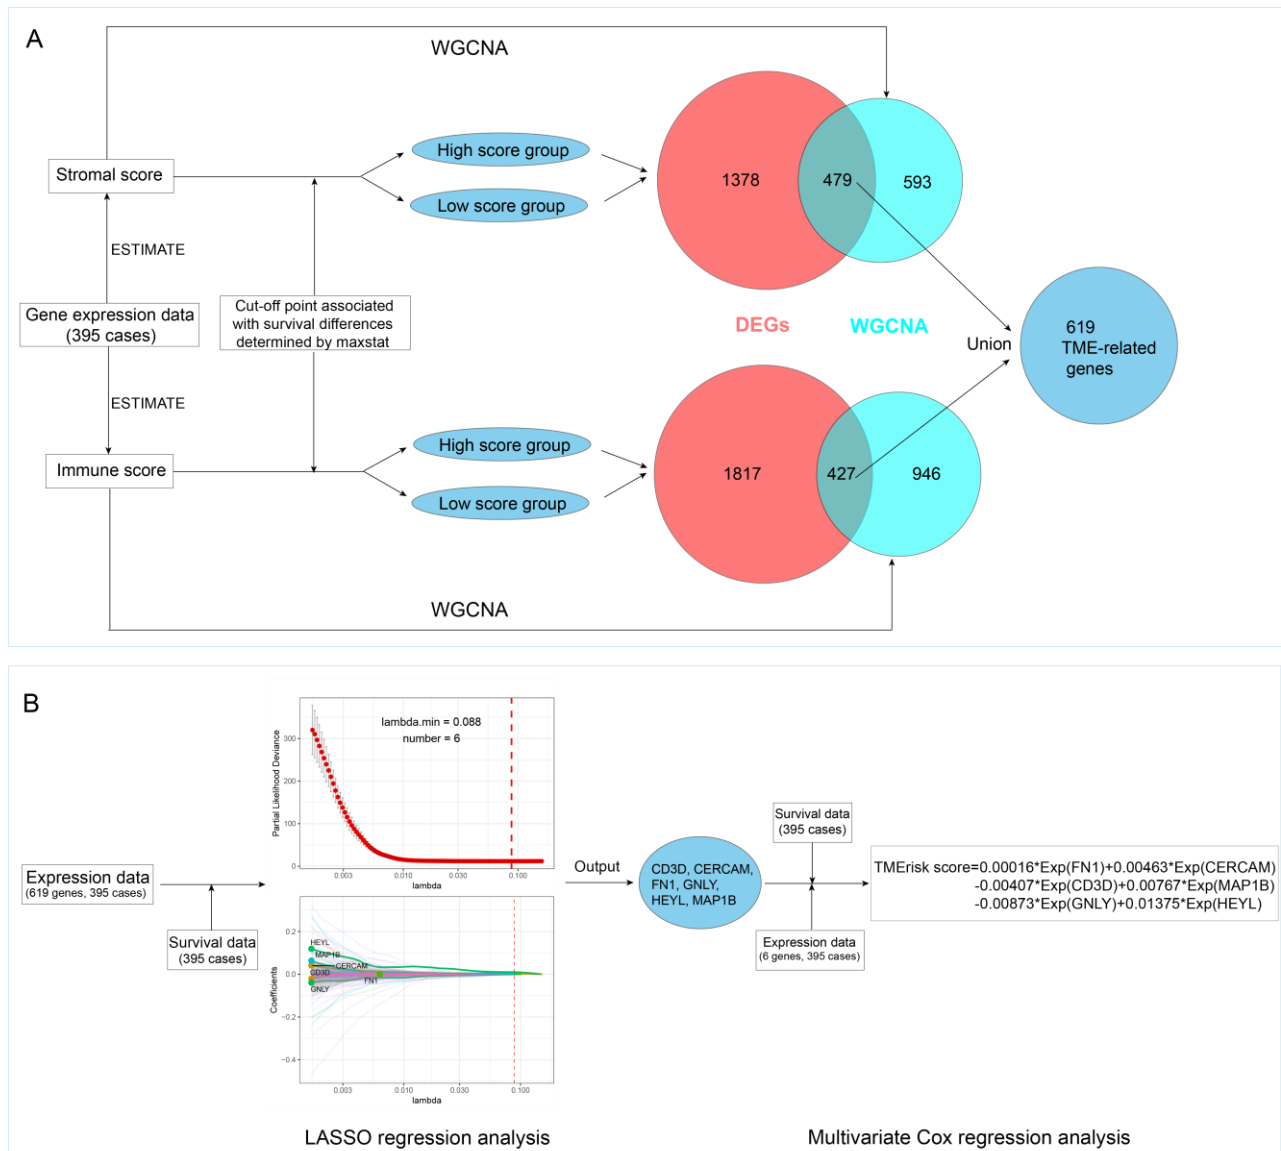

**Supplementary Figure 4. An example of establishing TME risk scores in BLCA for predicting OS.** A, procedures for screening TME-related genes. Firstly, patients were subdivided into groups with high and low immune and stromal scores according to the optimal cut-off point associated with survival differences. Secondly, DEGs between the high and low stromal/immune score groups and co-expressed gene modules strongly related to the immune and stromal scores were identified. Overlapped Gene lists of DEGs and WGCNA of stromal and immune groups were merged to generate the final list of TME-related genes. B, Genes selection for establishing TME risk score. LASSO regression analysis was conducted to identify TME-related genes whose expression levels were significantly associated with patient survival. Genes with a P value less than 0.1 assessed by univariate Cox regression analysis were finally used for establishing the TME risk score. Lambda( $\lambda$ ), the regularization parameter controlling the overall strength of the penalty; Partial likelihood deviance is used for evaluating the fit performance of the Cox regression model to the observed survival data, with a lower deviance indicating a superior fit of the model. In the background of LASSO Cox regression analysis, the value of partial likelihood deviance is identical to the mean cross-validated error(cvm); lambda.min (corresponding to the red dashed lines), the value of  $\lambda$  that gives minimum cvm, which determines the number of selected genes; Coefficients, LASSO coefficient profiles of genes associated with survival. The  $\text{Exp}(i)$  represents the expression value of gene  $i$ . The number before the  $\text{Exp}(i)$  represents the risk coefficient ( $\beta_i$ ) of gene  $i$ .

Pearson Correlation between Average Gene Expression of 9 randomly selected genes and TIL Score

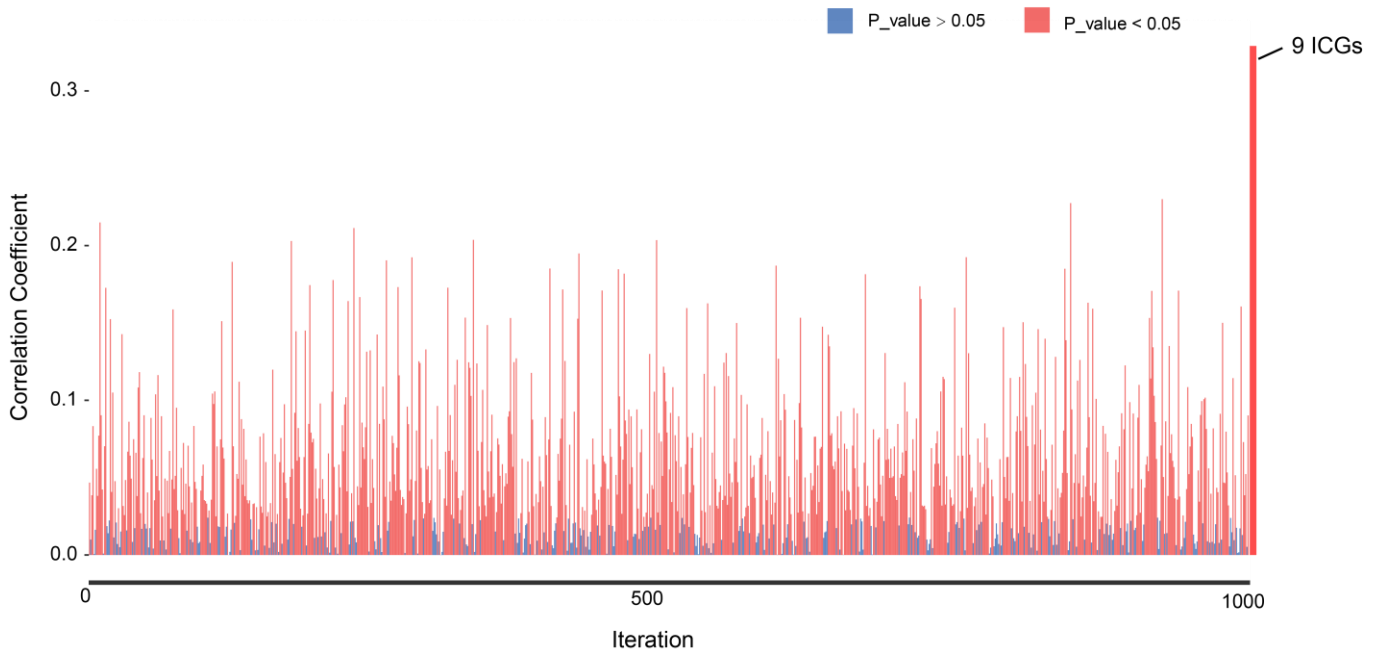

**Supplementary Figure 5. Pearson Correlation between Average Gene Expression of 9 randomly selected genes and TIL Score.** The horizontal coordinate indicates that 9 genes are randomly selected for 1000 iterations. The ordinate represents the Pearson correlation coefficient between TIL scores and 9 randomly selected genes. Red vertical lines indicate significant relationships ( $P < 0.05$ ).

## Effects of TME risk scores on overall survival (OS)

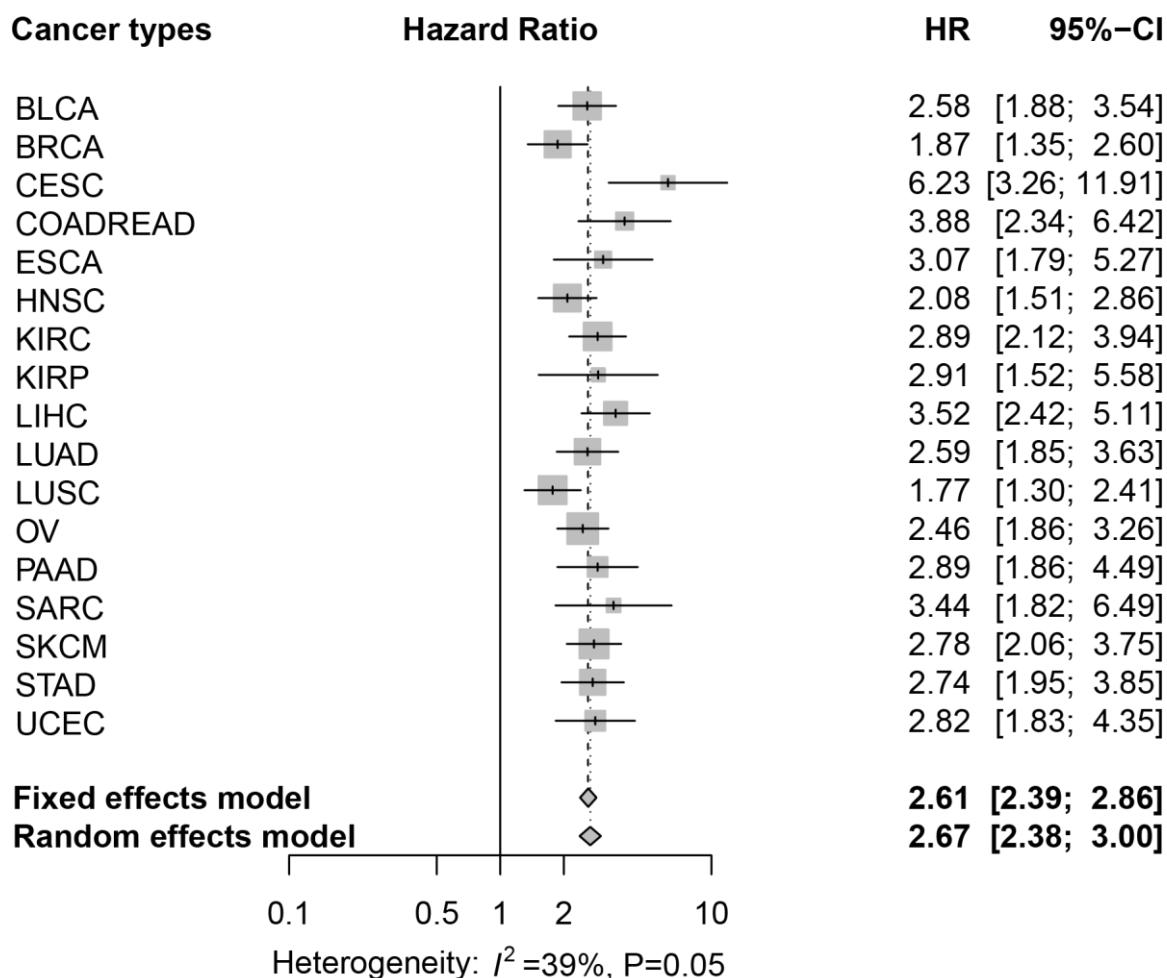

**Supplementary Figure 6. Forest plots for the effects of OS-based TME risk scores on OS.** The values of Hazard Ratio (HR) are delimited by 1. If HR value is less than 1, it means that TIL scores decrease the risk of death; if HR is greater than 1, it means that high TIL scores increase the risk of death.  $I^2$ : Inter-group heterogeneity test index. A  $P > 0.05$  means that there is no significant heterogeneity among the different cancer types; thus, the fixed effects model would be considered. Otherwise, the random effects model would be considered. The size of the square typically represents the weight or contribution of each cancer type to the overall effect estimate.

## Effects of TME risk scores on disease-specific survival (DSS)

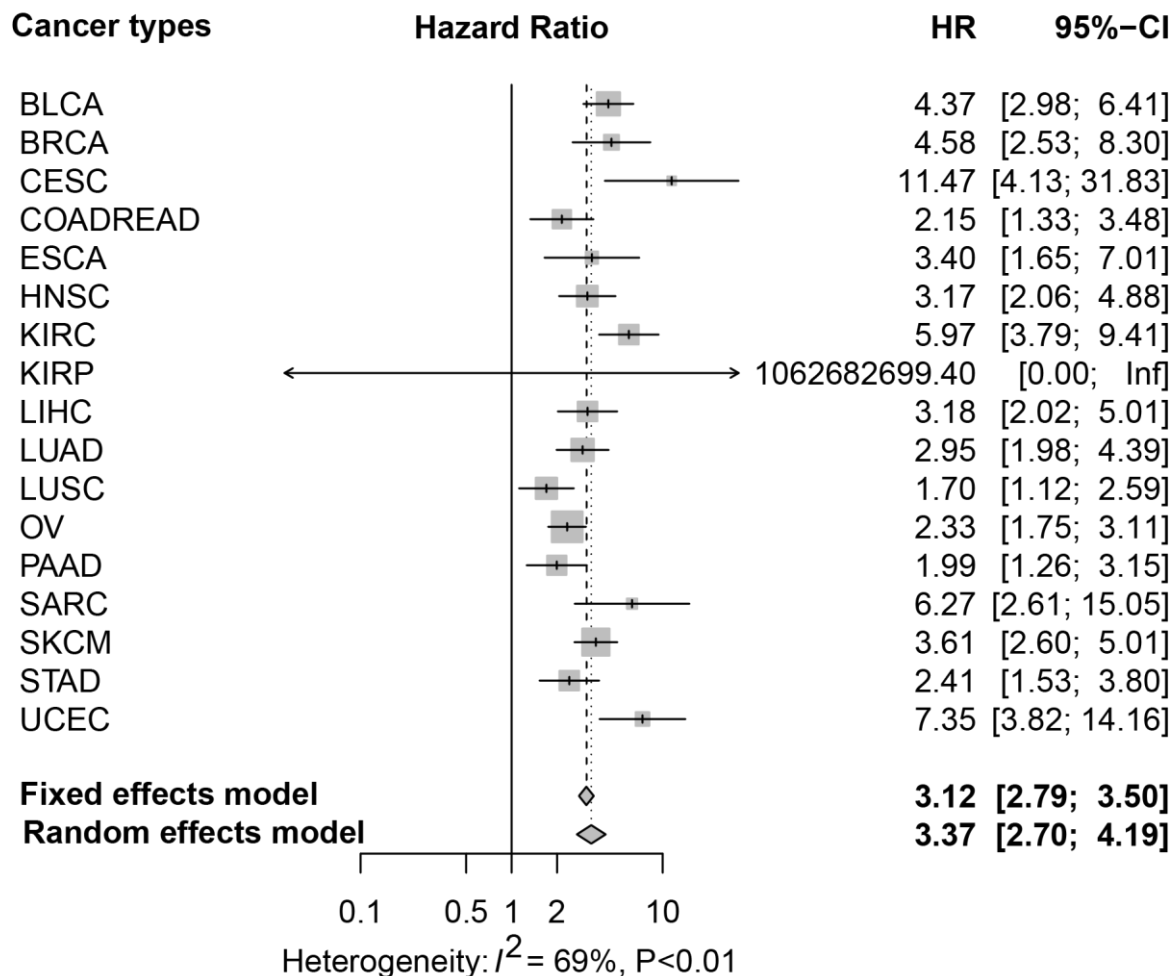

**Supplementary Figure 7. Forest plots for the effects of DSS-based TME risk scores on DSS.** The values of Hazard Ratio (HR) are delimited by 1. If HR value is less than 1, it means that TIL scores decrease the risk of cancer-specific death; if HR is greater than 1, it means that high TIL scores increase the risk of cancer-specific death.  $I^2$ : Inter-group heterogeneity test index. A  $P > 0.05$  means that there is no significant heterogeneity among the different cancer types; thus, the fixed effects model would be considered. Otherwise, the random effects model would be considered. The size of the square typically represents the weight or contribution of each cancer type to the overall effect estimate.

## Effects of TME risk scores on progression-free interval (PFI)

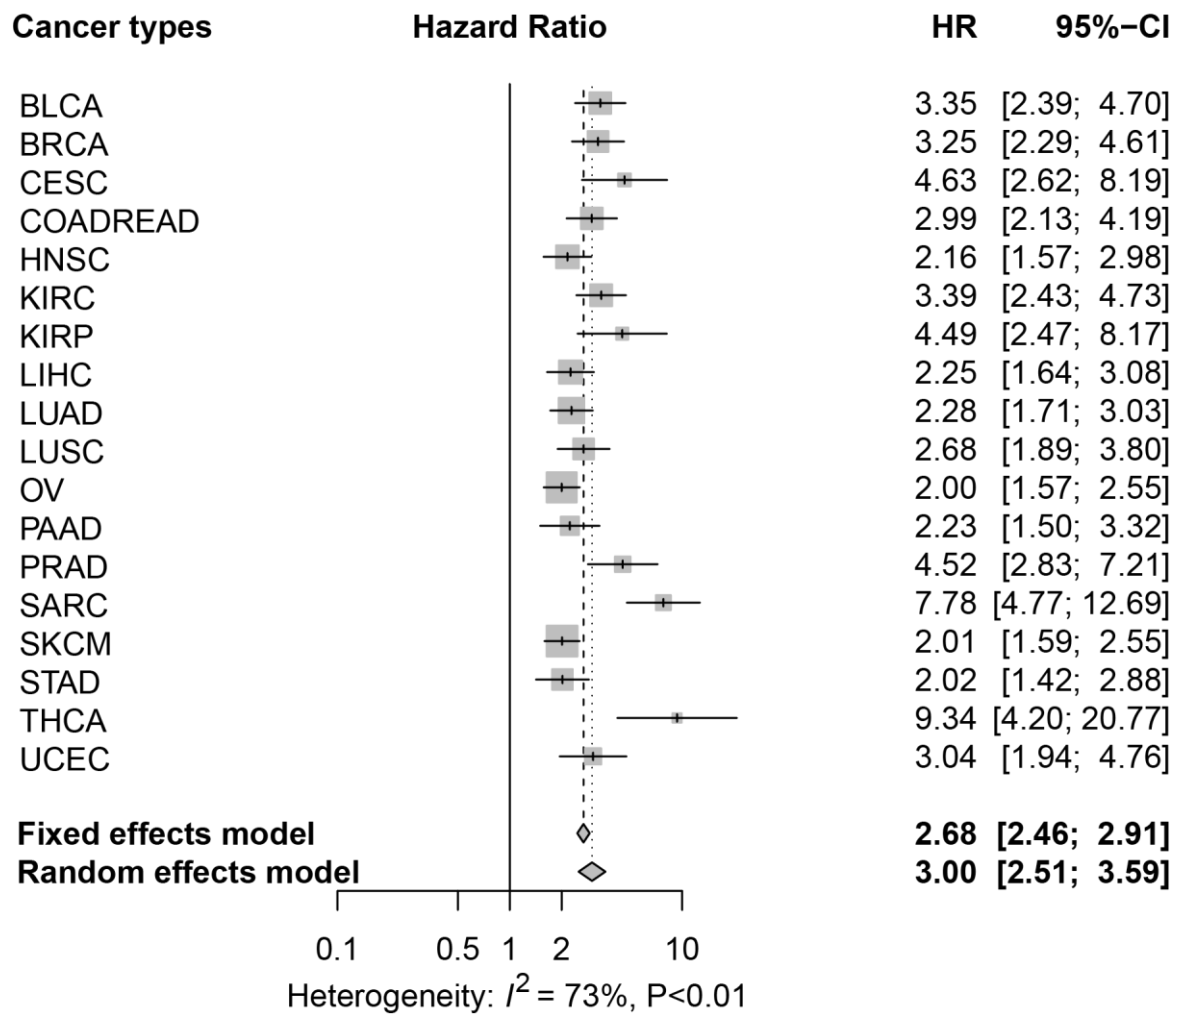

**Supplementary Figure 8. Forest plots for the effects of PFI-based TME risk scores on PFI.** The values of Hazard Ratio (HR) are delimited by 1. If HR value is less than 1, it means that TIL scores decrease the risk of recurrence; if HR is greater than 1, it means that high TIL scores increase the risk of recurrence.  $I^2$ : Inter-group heterogeneity test index. A  $P > 0.05$  means that there is no significant heterogeneity among the different cancer types; thus, the fixed effects model would be considered. Otherwise, the random effects model would be considered. The size of the square typically represents the weight or contribution of each cancer type to the overall effect estimate.

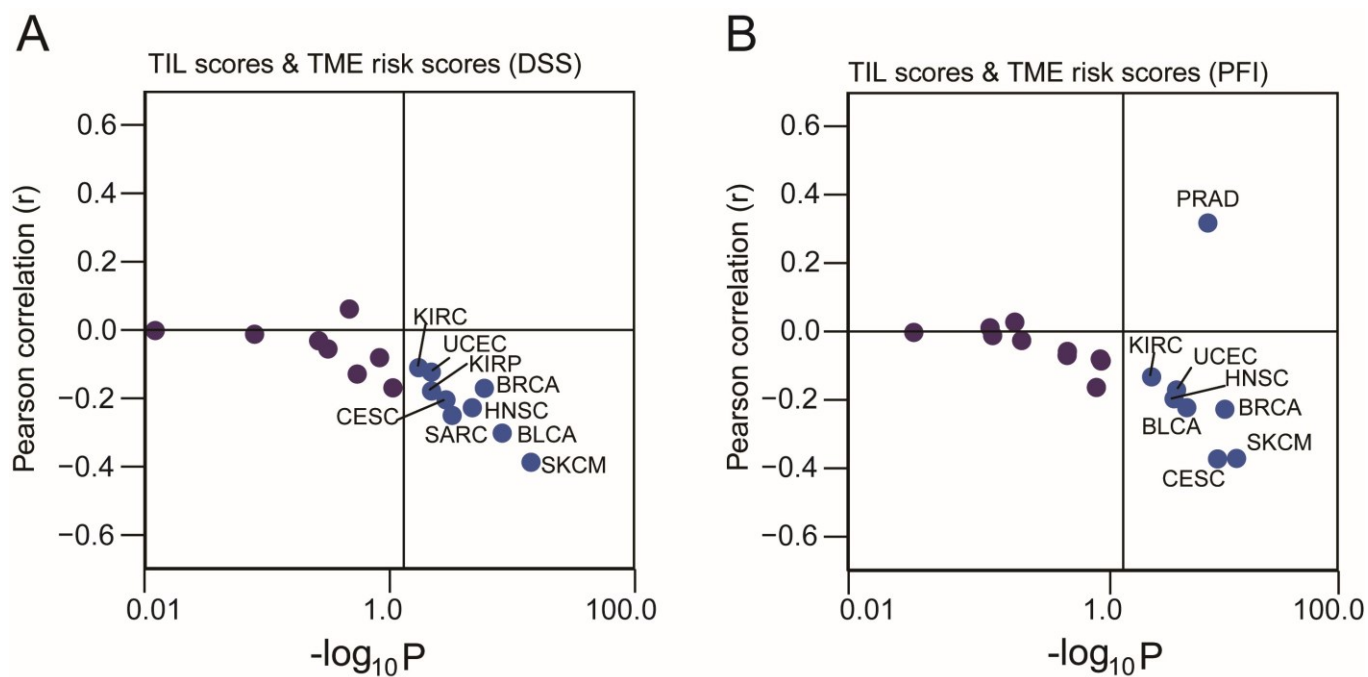

**Supplementary Figure 9. Pearson correlations between TIL scores and DSS- and PFI-based TME risk scores.** A, Pearson correlations between TIL scores and DSS-based TME risk scores. B, Pearson correlations between TIL scores and PFI-based TME risk scores. The vertical solid line is the dividing line where the P value equals 0.05. Cancer types with  $p < 0.05$  were labeled.

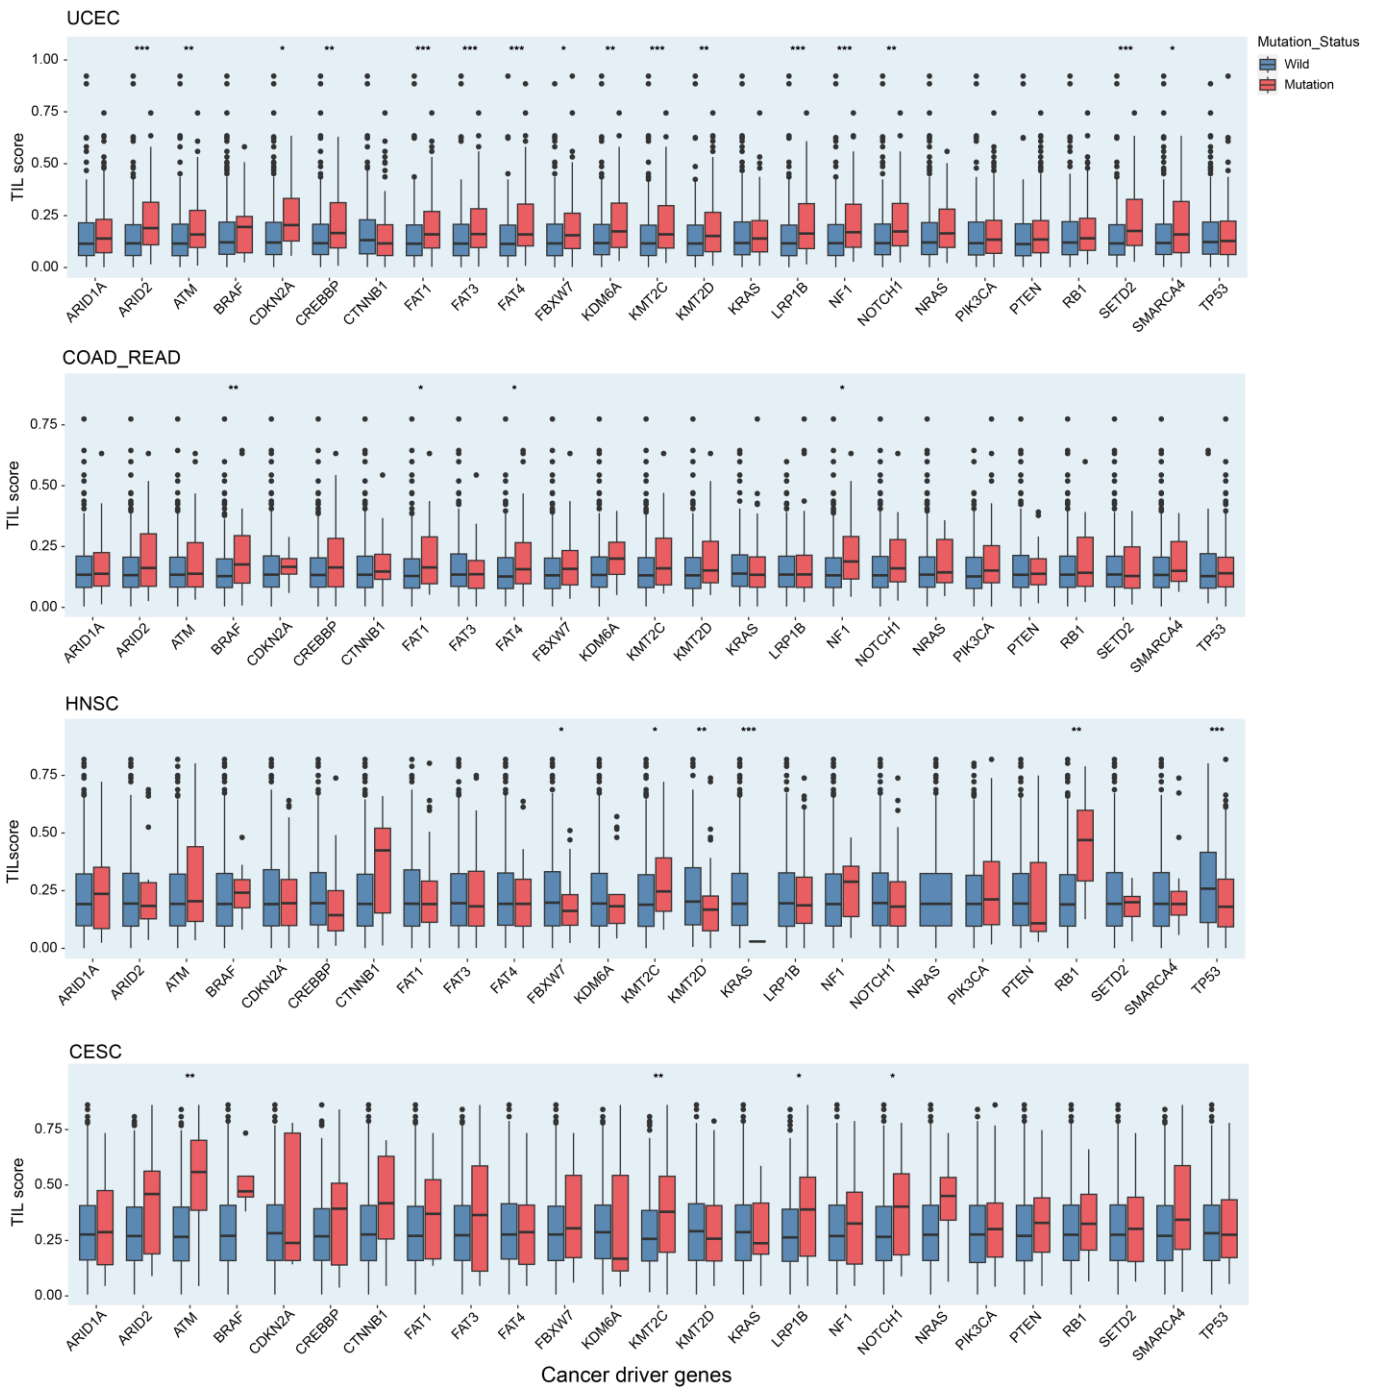

**Supplementary Figure 10. Effects of SNVs for 25 genes on TIL scores in UCEC, COAD\_READ, HNSC, and CESC.** TIL scores between the two groups were compared by the t-test. “\*”,  $P < 0.05$ ; “\*\*”,  $P < 0.01$ ; “\*\*\*”,  $P < 0.001$ .

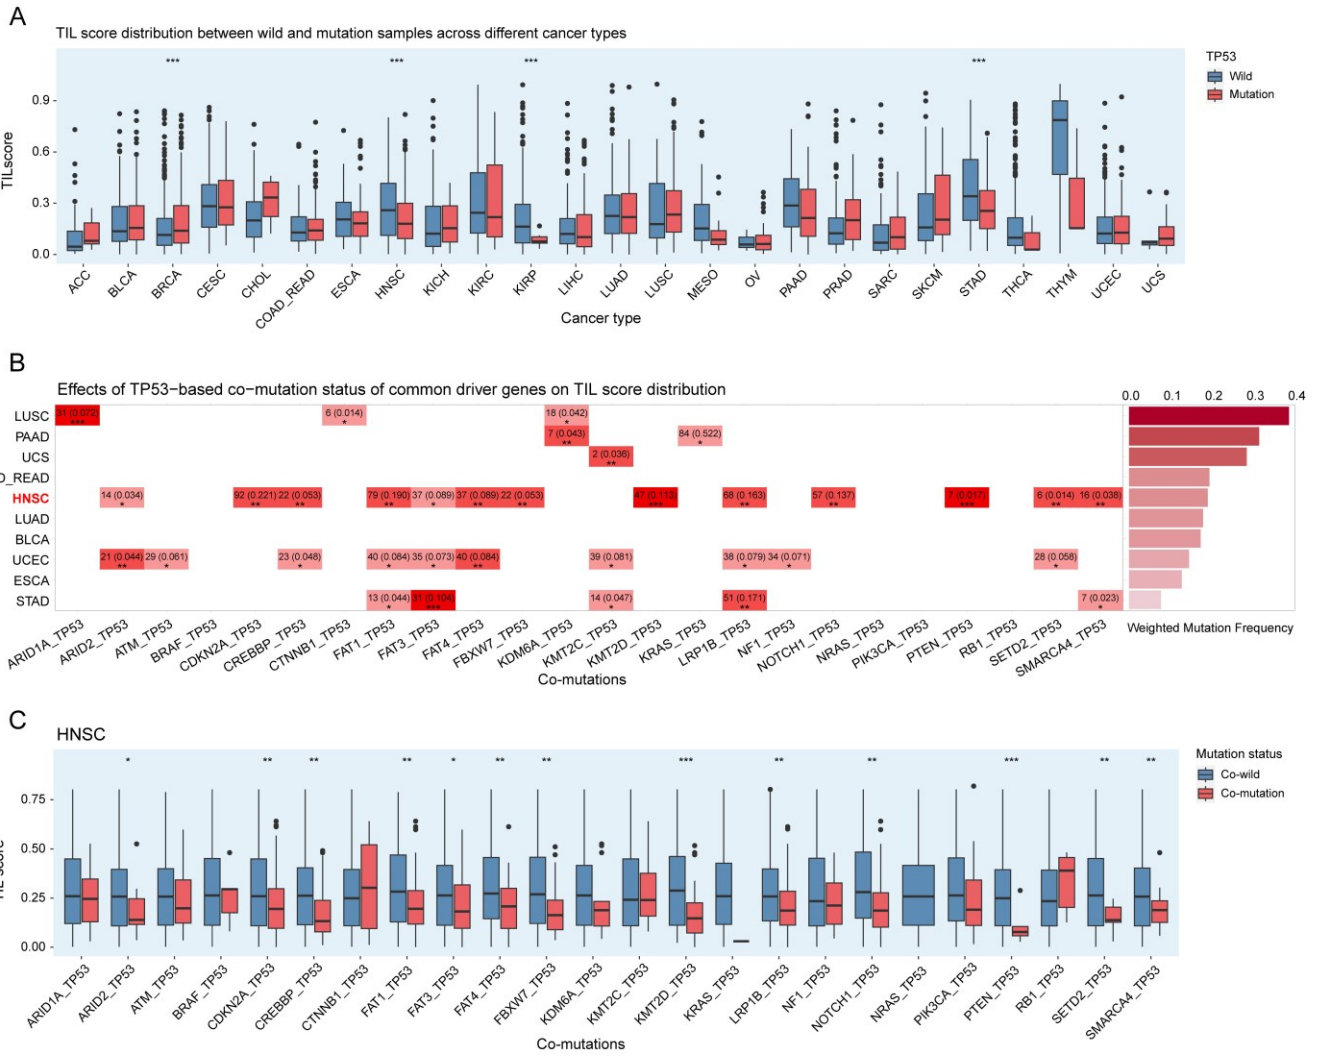

**Supplementary Figure 11. Effects of TP53-based co-mutation on TIL score distributions across different cancer types.** A, TIL score distribution differences between TP 53 wild and mutation samples across different cancer types. B, Effects of TP53-based co-mutation on TIL score distributions across different cancer types. C, Effects of TP-53 based co-mutation on TIL score distributions in HNSC. Color-filled squares indicate significant differences in TIL score distributions for two groups (t-test). Filled numbers represent the patient numbers and proportions of co-mutation for each gene in each cancer type. “\*”,  $P < 0.05$ ; “\*\*”,  $P < 0.01$ ; “\*\*\*”,  $P < 0.001$ .

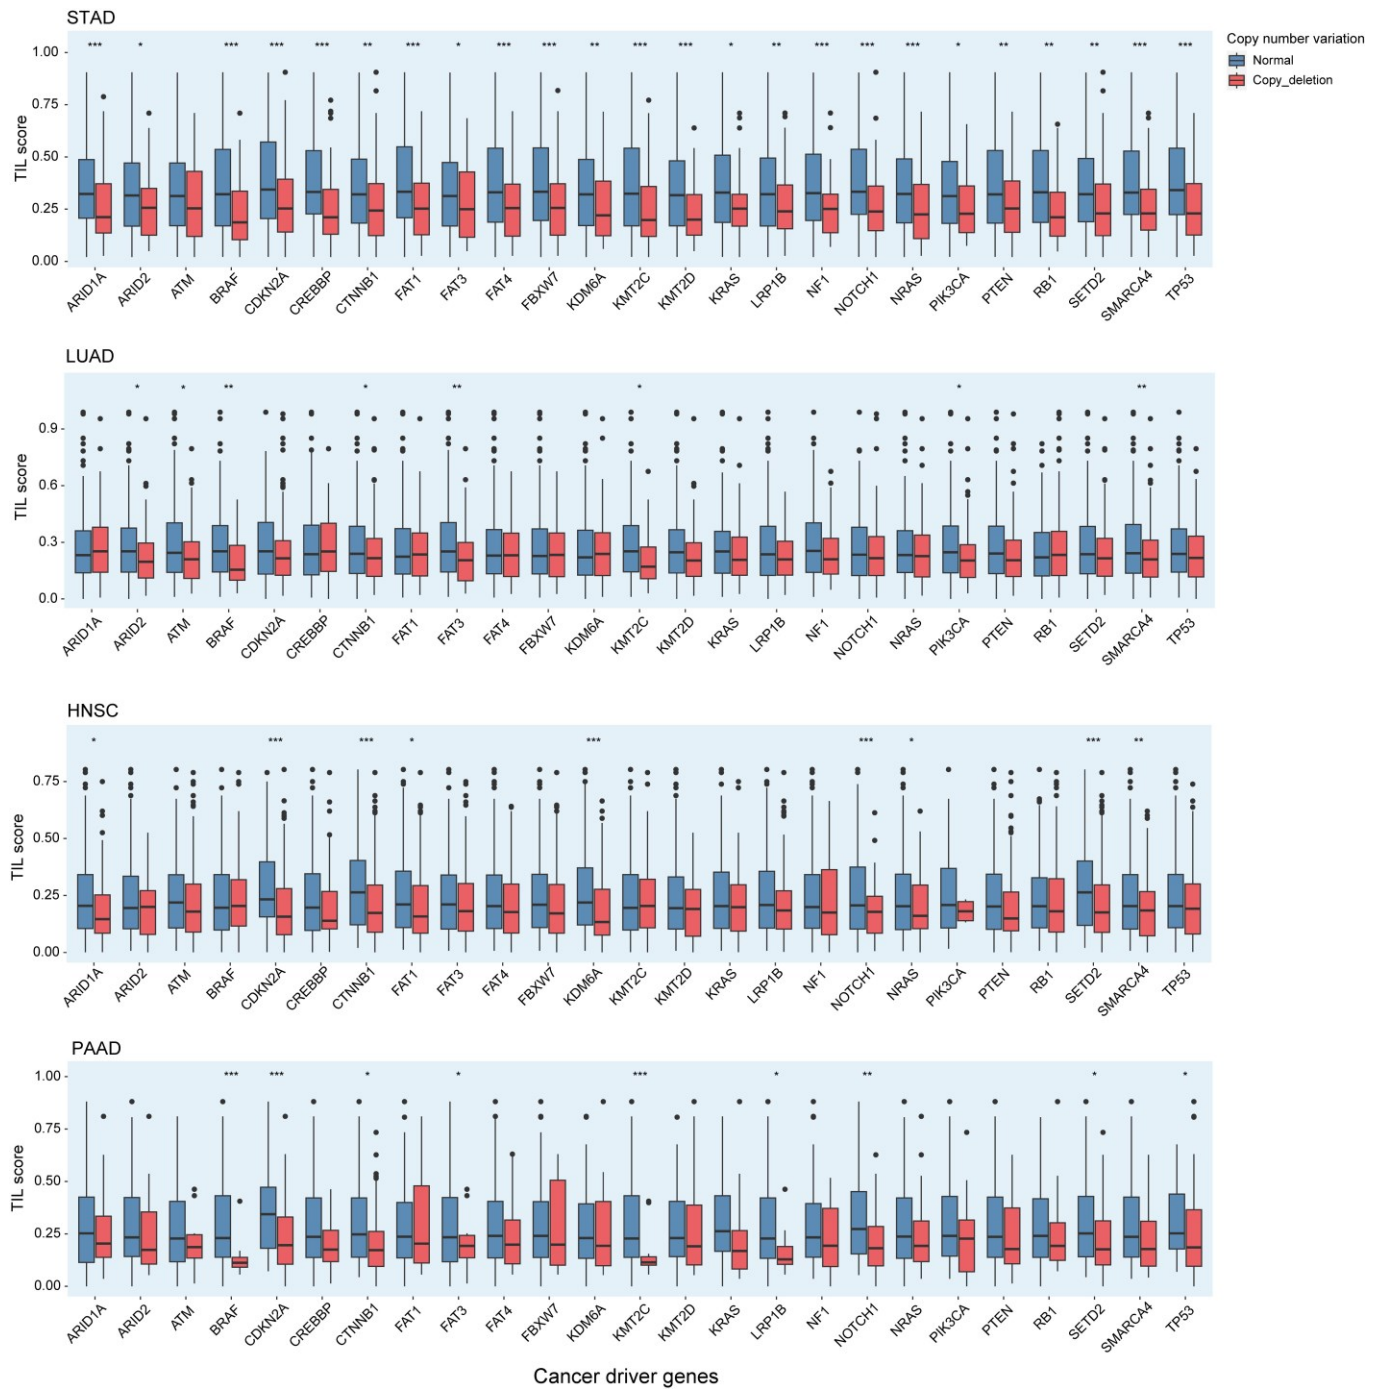

**Supplementary Figure 12. Effects of copy deletion for 25 genes on TIL score distributions in STAD, LUAD, HNSC, and PAAD.** TIL scores between the two groups were compared by the t-test. “\*”, P<0.05; “\*\*”, P<0.01; “\*\*\*”, P<0.001.

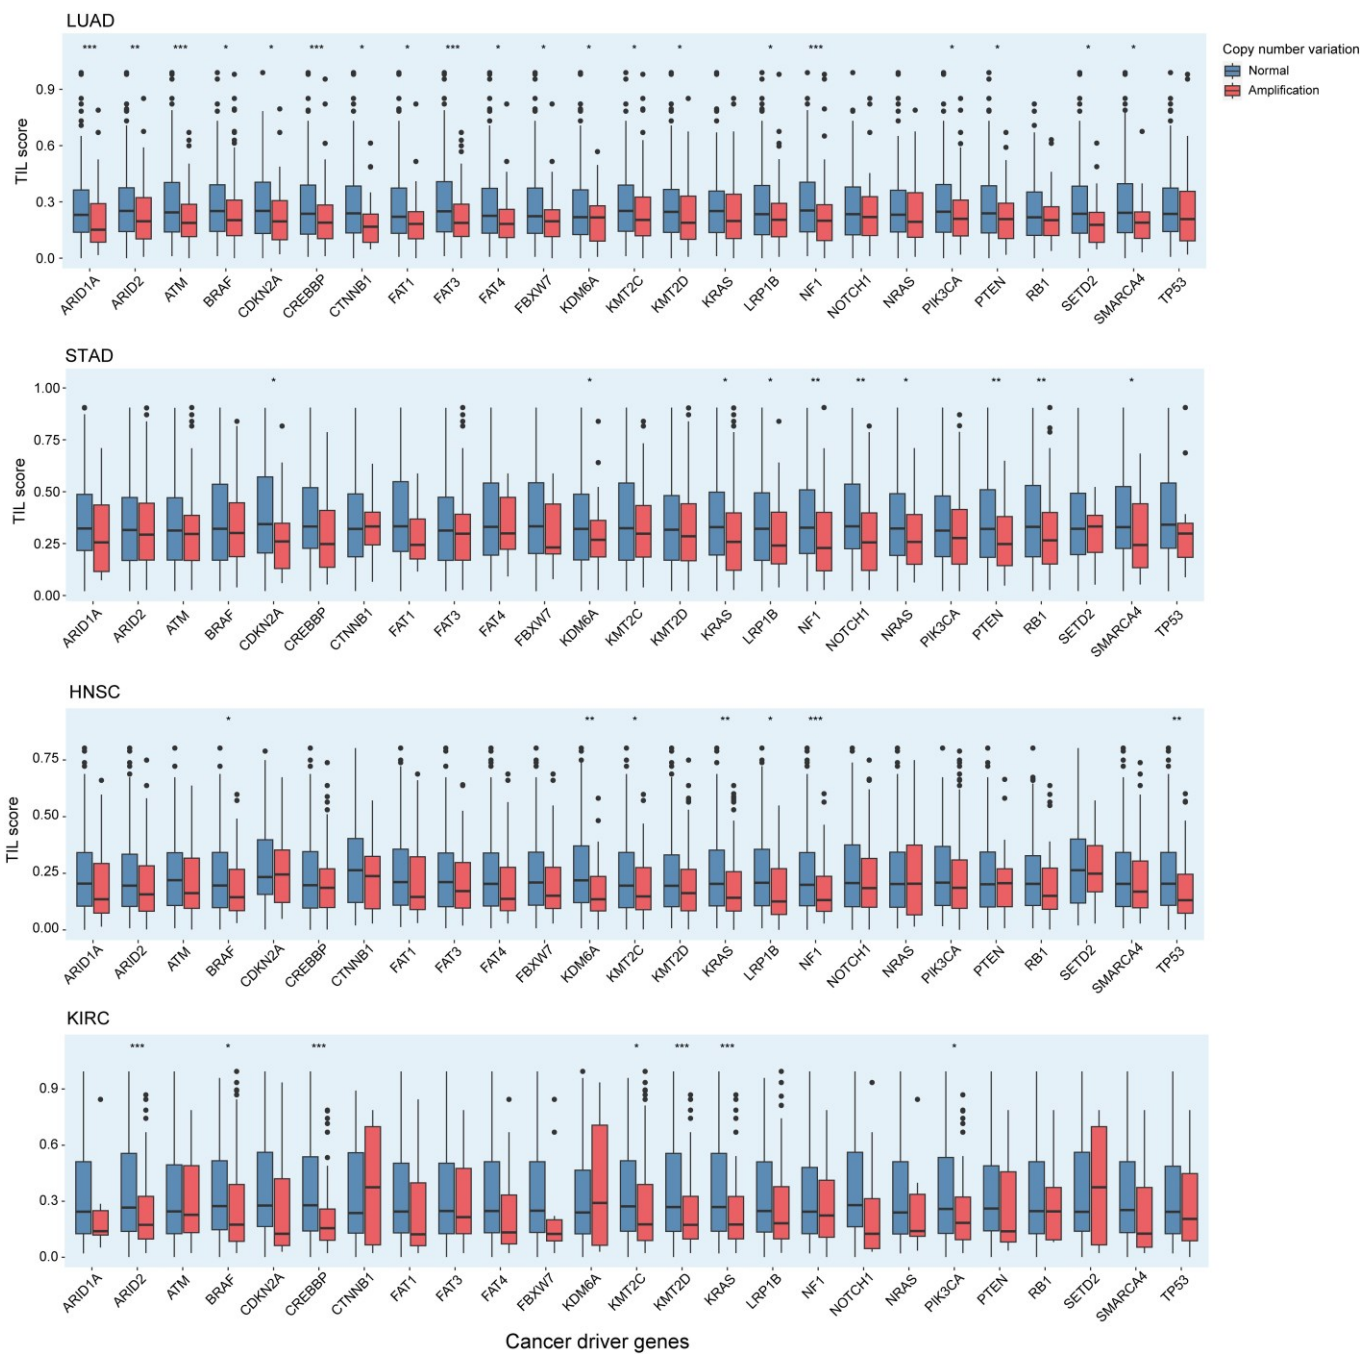

**Supplementary Figure 13. Effects of copy amplification for 25 genes on TIL score distributions in LUAD, STAD, HNSC and KIRC.** TIL scores between the two groups were compared by the t-test. “\*”, P<0.05; “\*\*”, P<0.01; “\*\*\*”, P<0.001.

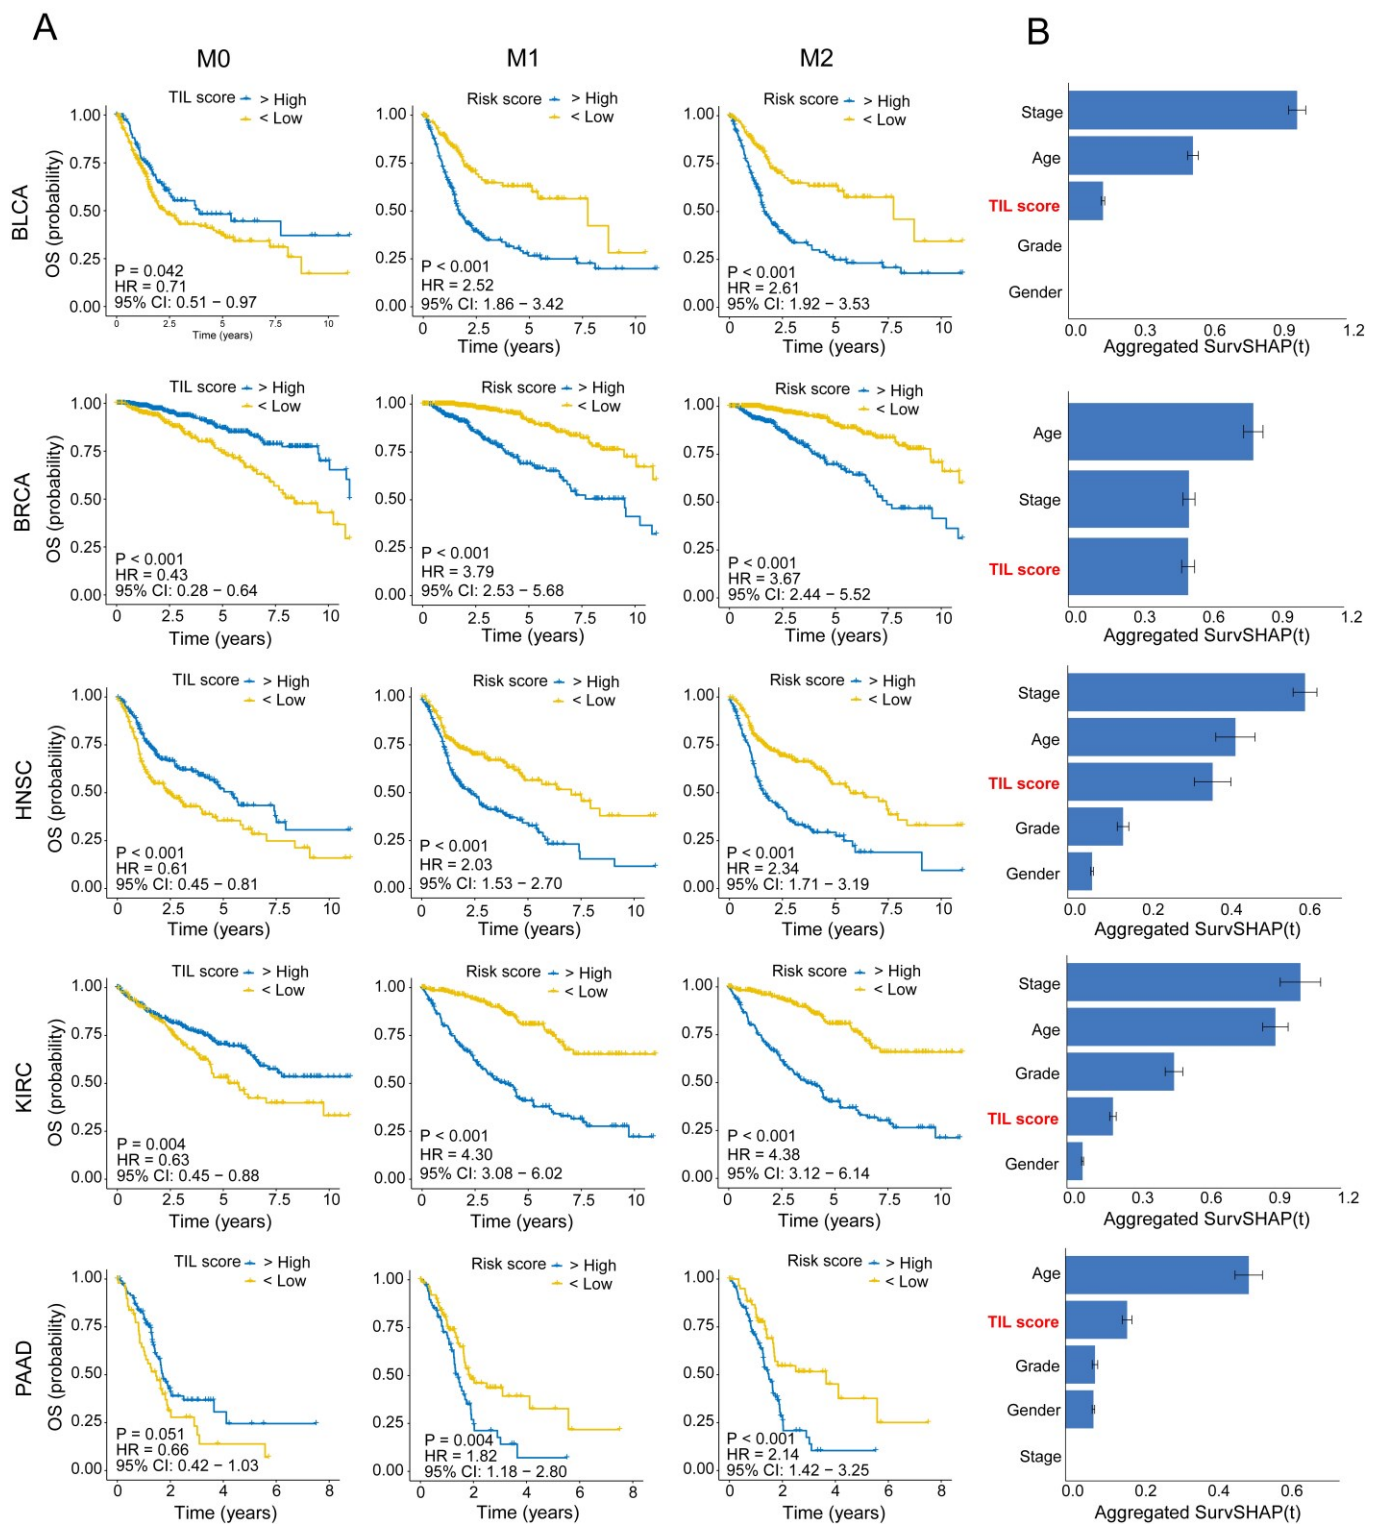

**Supplementary Figure 14. Performance of different prognostic models for predicting OS in BLCA, BRCA, HNSC, KIRC and PAAD.** M1, prognostic models based on clinical data only; M2, prognostic models established by clinical data combined with TIL scores. A, Kaplan-Meier curves of patient stratification for OS across different cancer types under different models. M0, Effects of TIL scores on OS. B, the corresponding average aggregated SurvSHAP(t) values of each variable for M2 models. SurvSHAP(t) is a kind of time-dependent explanations of machine learning survival models. An aggregated SurvSHAP(t) value of one variable represents its importance measure in one case. Average aggregated SurvSHAP(t) value of one variable represents its global importance across all samples in the model.

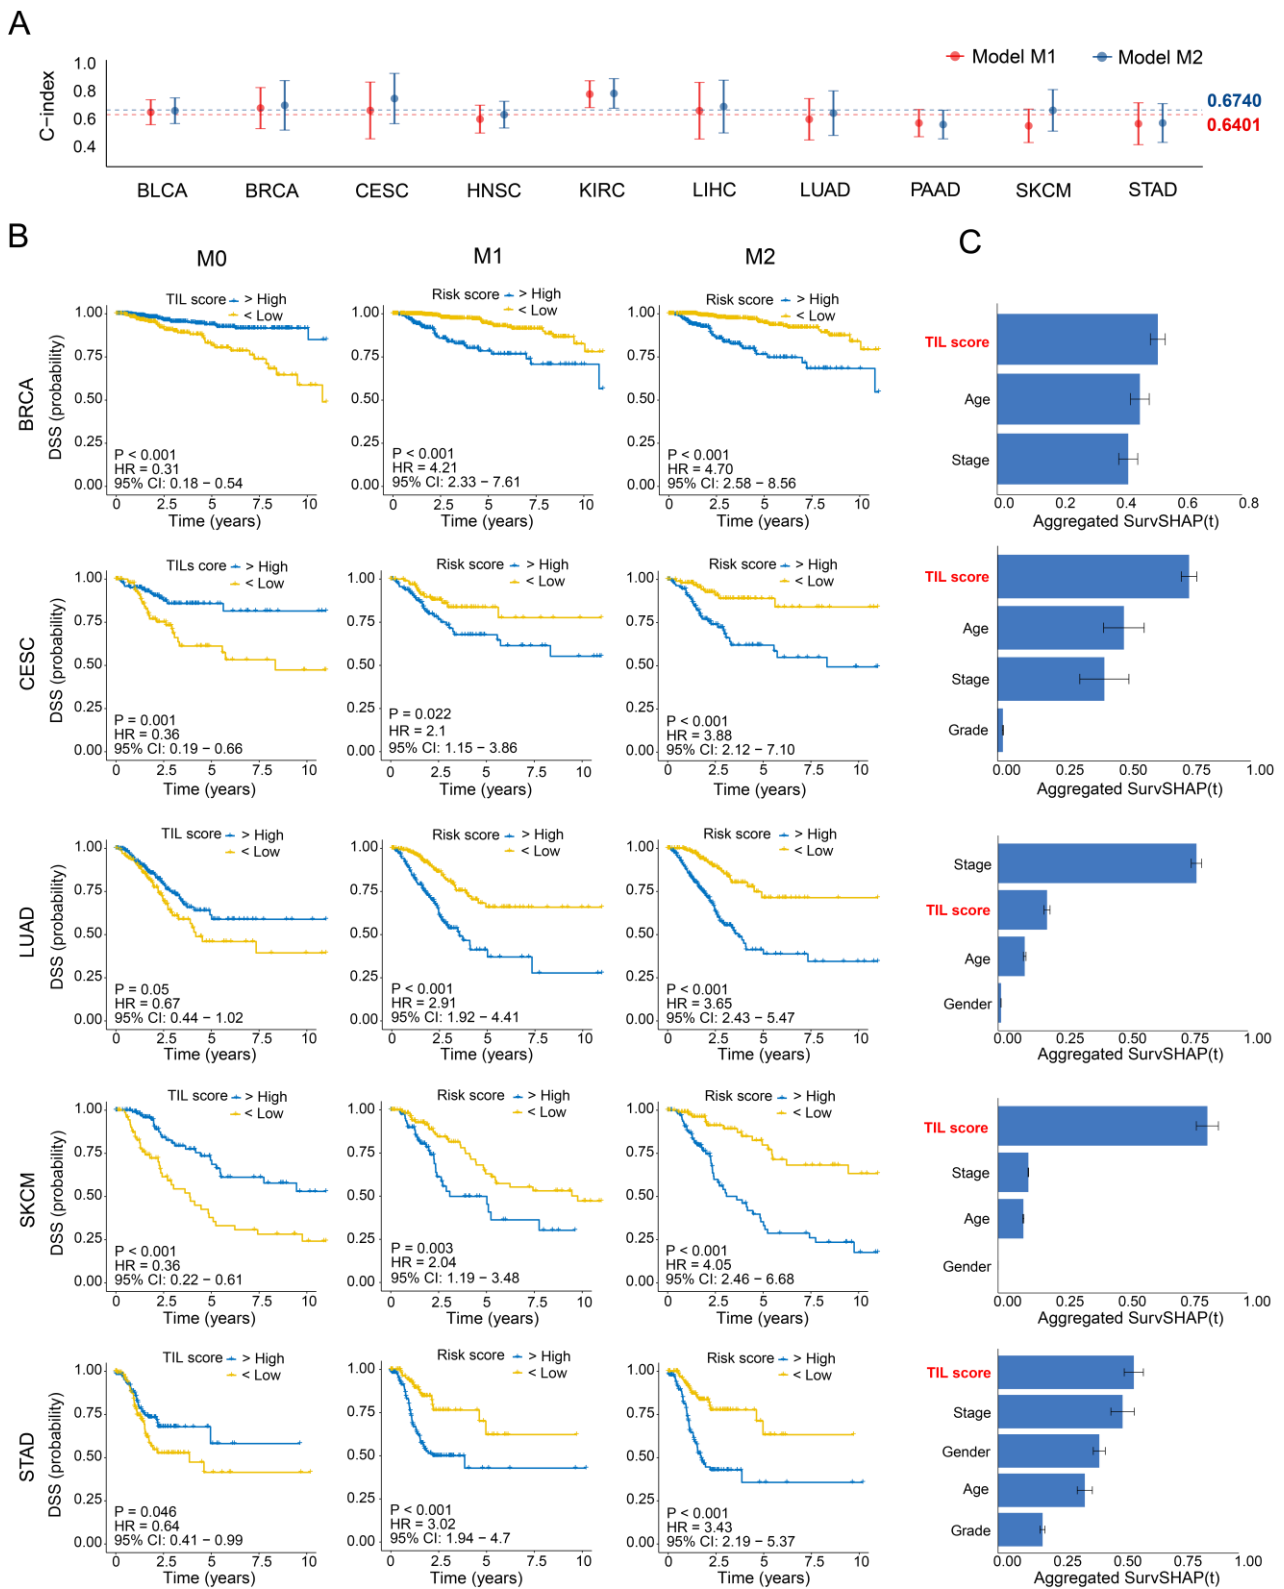

**Supplementary Figure 15. Performance of different prognostic models for predicting DSS in BRCA, CESC, LUAD, SKCM and STAD.** M1, prognostic models based on clinical data only; M2, prognostic models established by clinical data combined with TIL scores. A, C-indices of M1 and M2 in each cancer type in a 5-fold cross-validation. Horizontal lines indicate average C-indices across all cancer types for two types of models. B, Kaplan-Meier curves of patient stratification for DSS across different cancer types under different models. M0, Effects of TIL scores on DSS. C, the corresponding average aggregated SurvSHAP(t) values of each variable for M2 models. SurvSHAP(t) is a kind of time-dependent explanations of machine learning survival models. An aggregated SurvSHAP(t) value of one variable represents its importance measure in one case. Average aggregated SurvSHAP(t) value of one variable represents its global importance across all samples in the model.

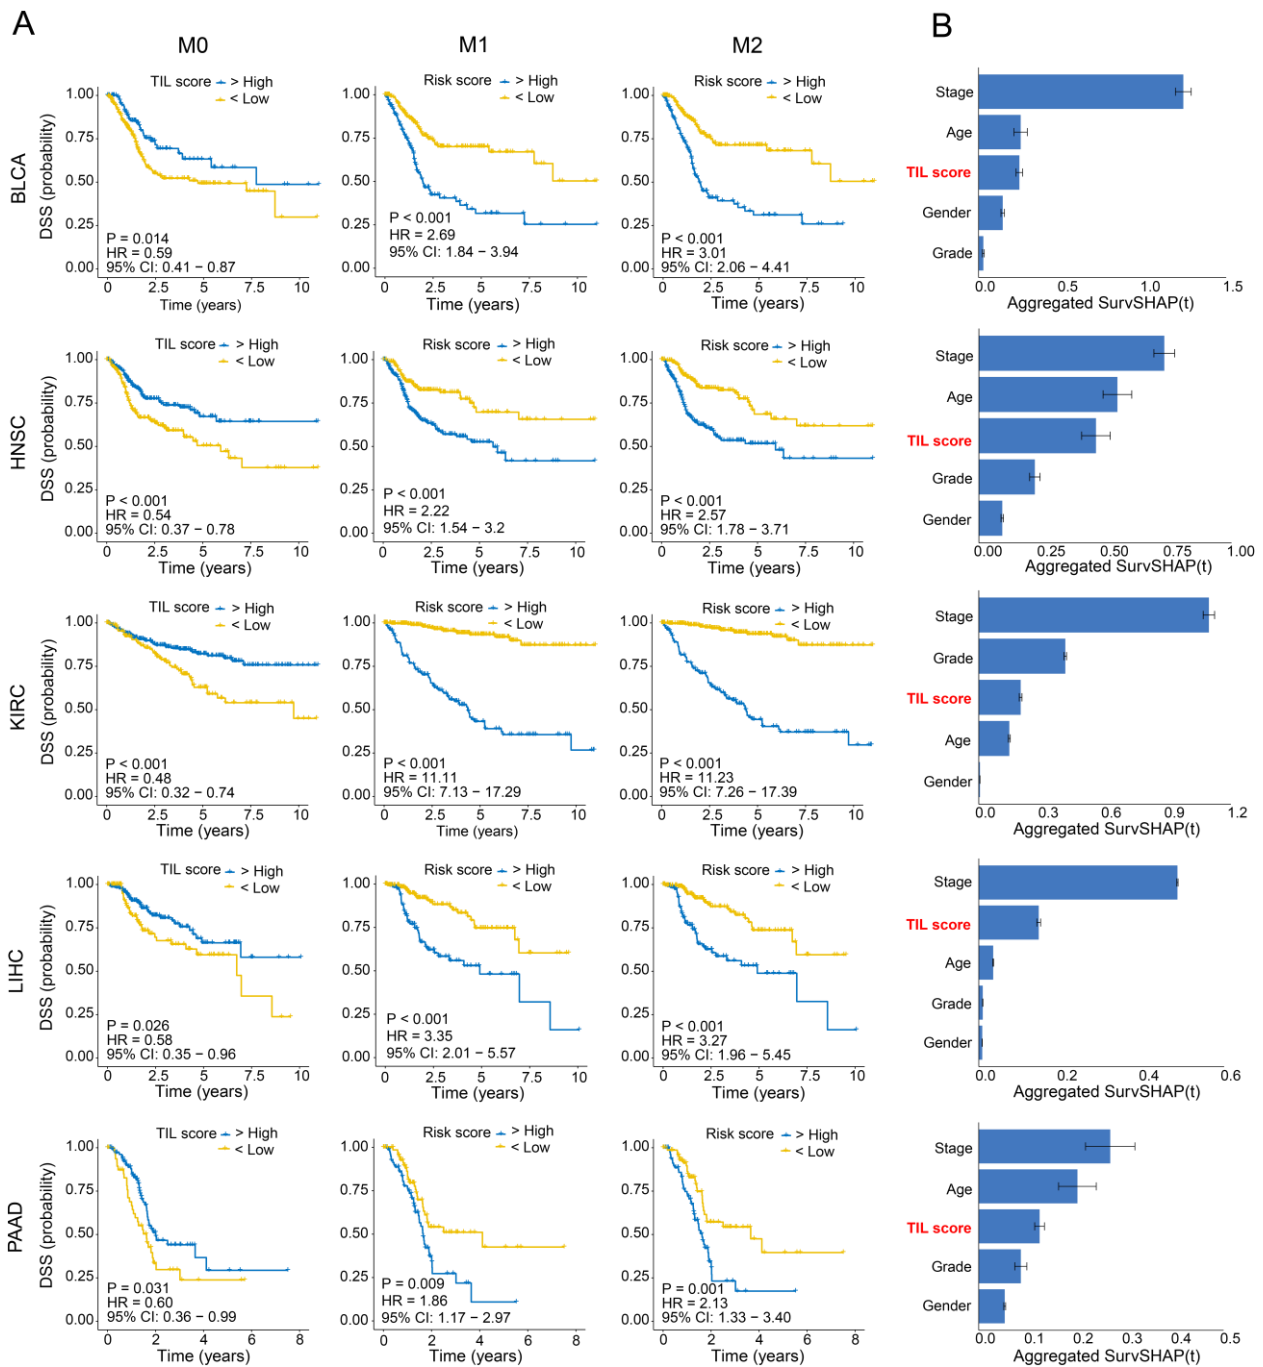

**Supplementary Figure 16. Performance of different prognostic models for predicting DSS in BLCA, HNSC, KIRC, LIHC and PAAD.** M1, prognostic models based on clinical data only; M2, prognostic models established by clinical data combined with TIL > scores. A, Kaplan-Meier curves of patient stratification for DSS across different cancer types under different models. M0, Effects of TIL scores on DSS. B, the corresponding average aggregated SurvSHAP(t) values of each variable for M2 models. SurvSHAP(t) is a kind of time-dependent explanations of machine learning survival models. An aggregated SurvSHAP(t) value of one variable represents its importance measure in one case. Average aggregated SurvSHAP(t) value of one variable represents its global importance across all samples in the model.

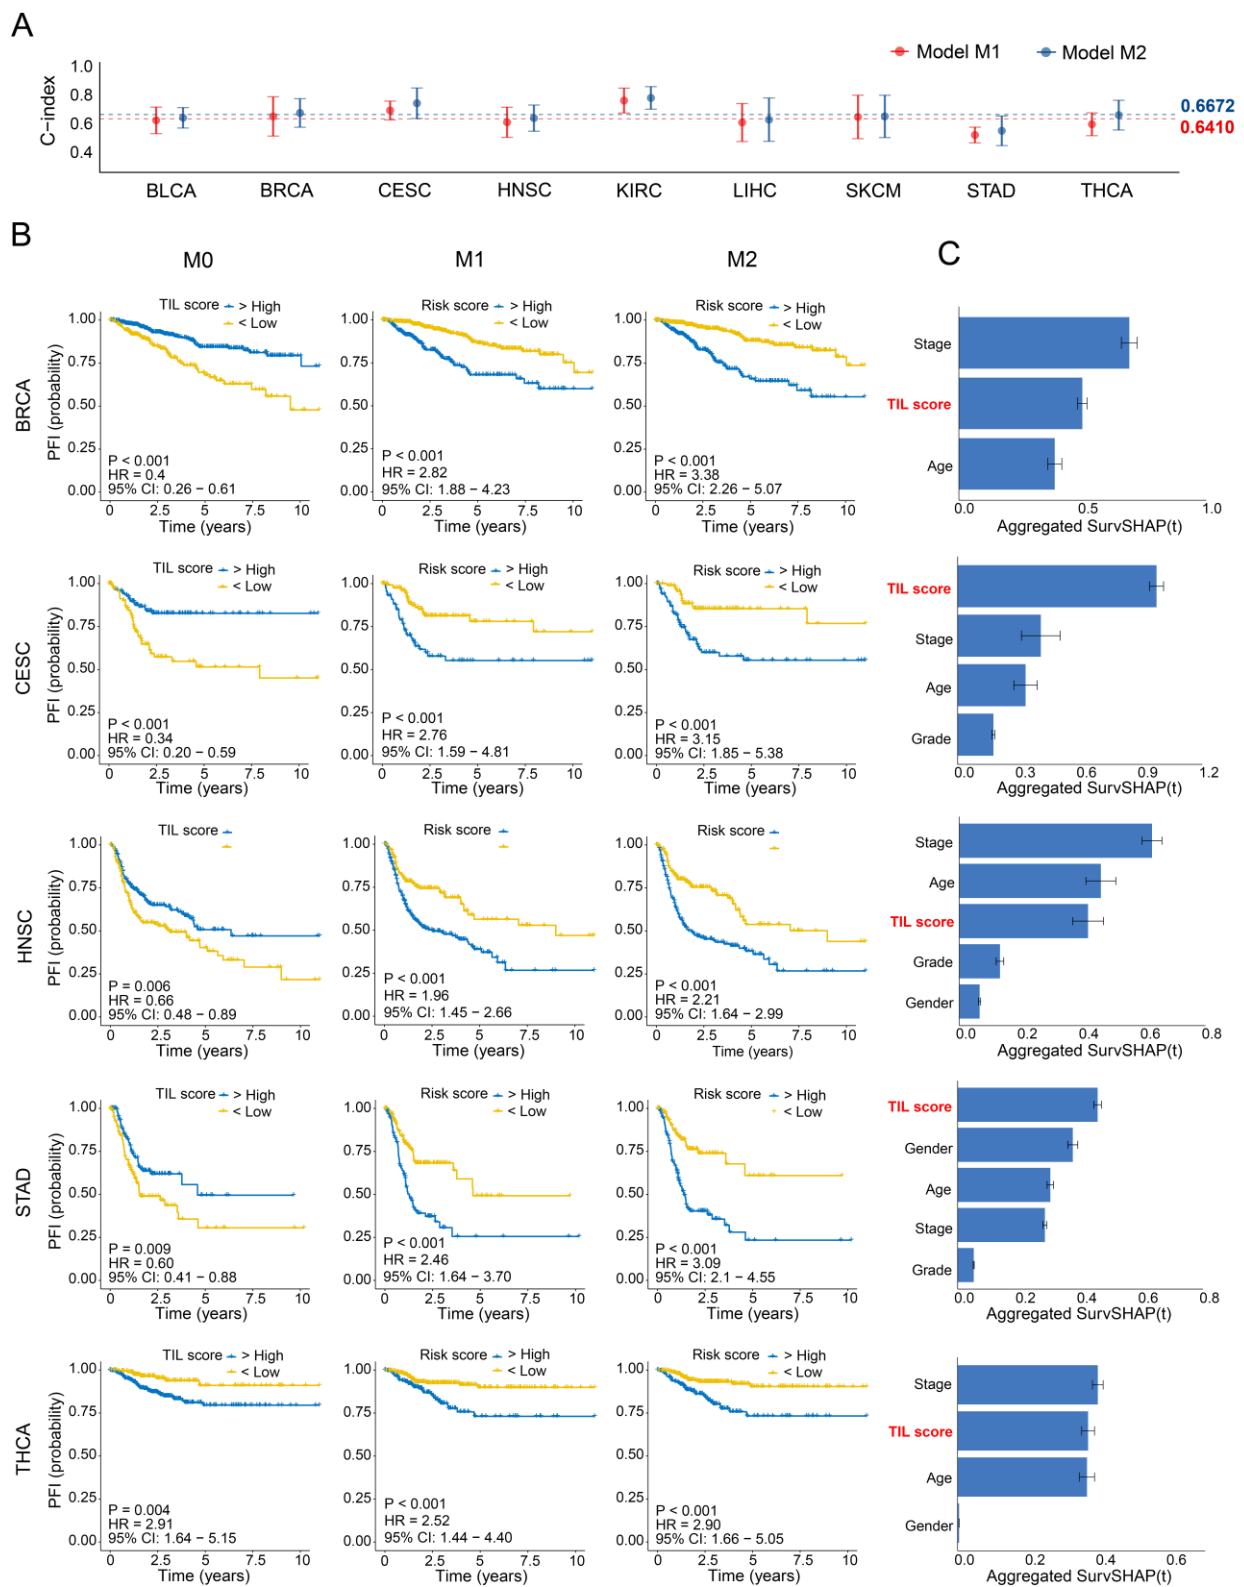

**Supplementary Figure 17. Performance of different prognostic models for predicting PFI in BRCA, CESC, HNSC, STAD, and THCA.** M1, prognostic models based on clinical data only; M2, prognostic models established by clinical data combined with TIL scores. A, C-indices of M1 and M2 in each cancer type in a 5-fold cross-validation. Horizontal lines indicate average C-indices across all cancer types for two types of models. B, Kaplan-Meier curves of patient stratification for PFI across different cancer types under different models. M0, Effects of TIL scores on PFI. C, the corresponding average aggregated SurvSHAP(t) values of each variable for M2 models. SurvSHAP(t) is a kind of time-dependent explanations of machine learning survival models. An aggregated SurvSHAP(t) value of one variable represents its importance measure in one case. Average aggregated SurvSHAP(t) value of one variable represents its global importance across all samples in the model.

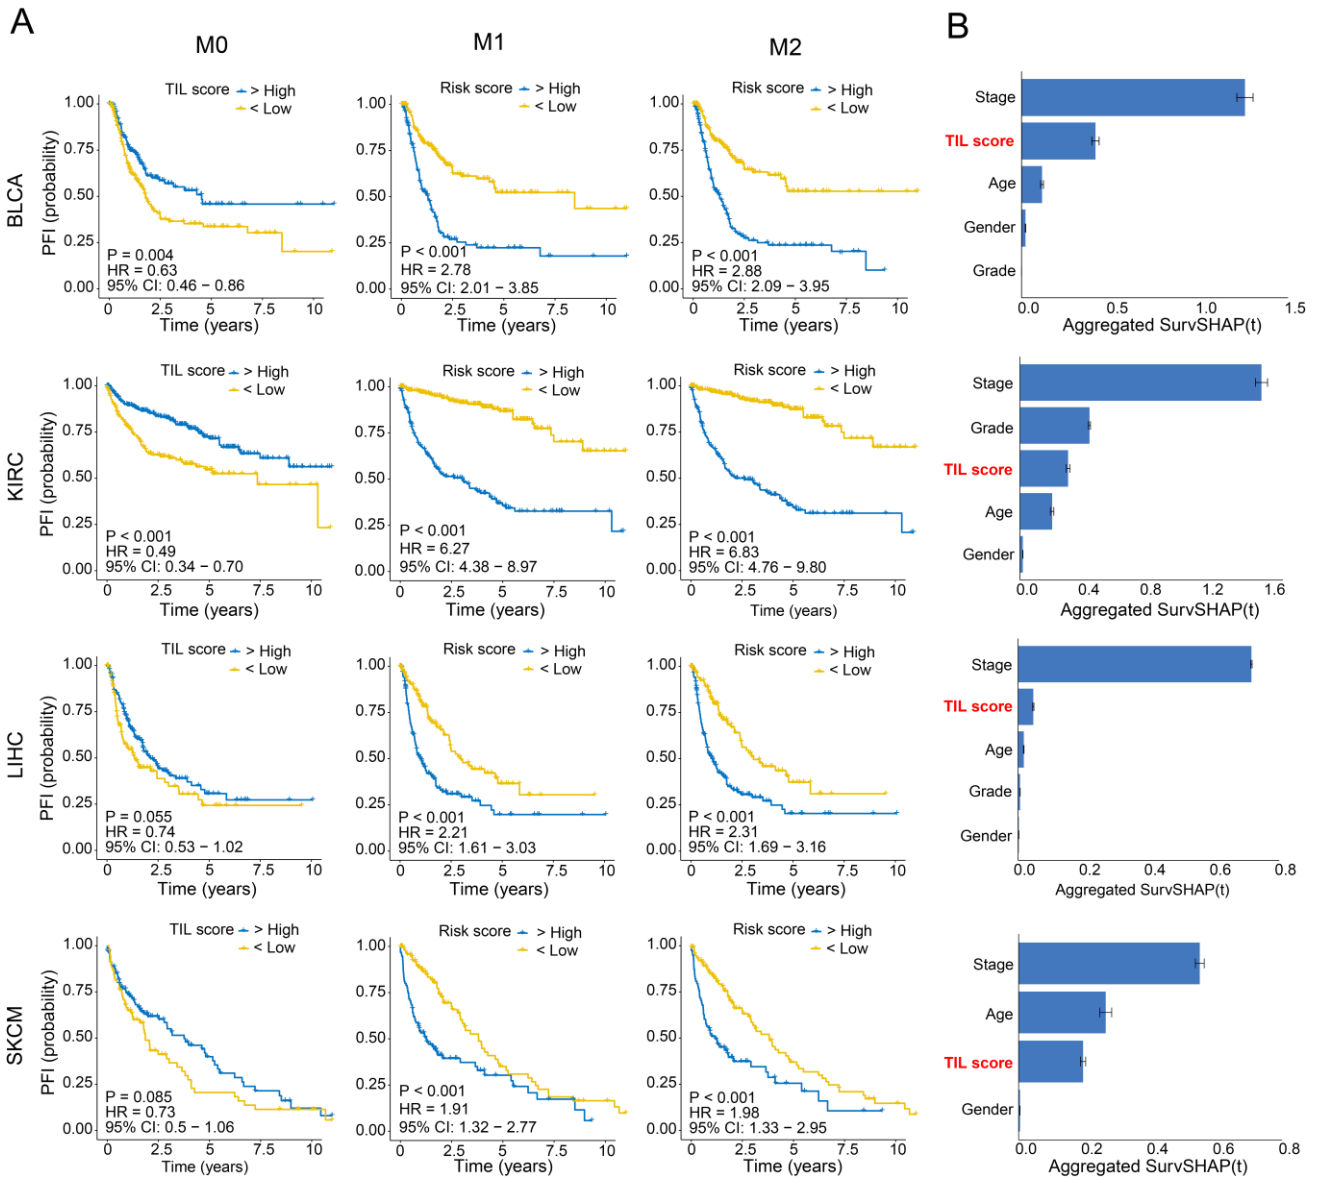

**Supplementary Figure 18. Performance of different prognostic models for predicting PFI in BLCA, KIRC, LIHC and SKCM.** M1, prognostic models based on clinical data only; M2, prognostic models established by clinical data combined with TIL scores. A, Kaplan-Meier curves of patient stratification for PFI across different cancer types under different models. M0, Effects of TIL scores on PFI. B, the corresponding average aggregated SurvSHAP(t) values of each variable for M2 models. SurvSHAP(t) is a kind of time-dependent explanations of machine learning survival models. An aggregated SurvSHAP(t) value of one variable represents its importance measure in one case. Average aggregated SurvSHAP(t) value of one variable represents its global importance across all samples in the model.

**Supplementary Table 1. Distribution of patch counts across 28 cancer types in the initial dataset**

| Cancer types | Total number of WSIs in TCGA | Total number of WSIs after initial selection* | Total number of patches in selected WSIs | Patch labeling and selection for the dataset (N) |               |                    |               | Number of WSIs from which the final patches were derived | Total patches of WSIs from which the final patches were derived |
|--------------|------------------------------|-----------------------------------------------|------------------------------------------|--------------------------------------------------|---------------|--------------------|---------------|----------------------------------------------------------|-----------------------------------------------------------------|
|              |                              |                                               |                                          | TIL-positive                                     | TIL-negative  | Non-tumor/necrotic | Total         |                                                          |                                                                 |
| BLCA         | 457                          | 444                                           | 21,333,370                               | 1,259                                            | 1,649         | 1,859              | 4,767         | 372                                                      | 18,751,223                                                      |
| BRCA         | 1,133                        | 930                                           | 31,113,409                               | 1,188                                            | 1,784         | 1,748              | 4,720         | 129                                                      | 5,035,683                                                       |
| CESC         | 279                          | 278                                           | 8,421,554                                | 1,334                                            | 1,748         | 1,782              | 4,864         | 98                                                       | 2,740,200                                                       |
| COADREAD     | 624                          | 324                                           | 10,428,565                               | 986                                              | 1,815         | 1,802              | 4,603         | 96                                                       | 3,306,599                                                       |
| HNSC         | 472                          | 450                                           | 15,312,927                               | 1,258                                            | 1,938         | 1,596              | 4,792         | 105                                                      | 11,508,275                                                      |
| KIRC         | 519                          | 478                                           | 19,935,295                               | 1,155                                            | 1,785         | 1,908              | 4,848         | 306                                                      | 4,930,175                                                       |
| KIRP         | 300                          | 279                                           | 11,148,896                               | 314                                              | 1,692         | 1,794              | 3,800         | 111                                                      | 2,928,364                                                       |
| LIHC         | 379                          | 359                                           | 14,705,603                               | 1,380                                            | 1,938         | 1,825              | 5,143         | 73                                                       | 2,900,678                                                       |
| LUAD         | 541                          | 480                                           | 17,490,605                               | 1,359                                            | 1,780         | 1,804              | 4,943         | 72                                                       | 12,434,325                                                      |
| LUSC         | 512                          | 477                                           | 17,593,127                               | 1,214                                            | 1,823         | 1,767              | 4,804         | 302                                                      | 1,805,488                                                       |
| PRAD         | 449                          | 315                                           | 10,490,867                               | 1,023                                            | 1,913         | 1,911              | 4,847         | 49                                                       | 2,217,460                                                       |
| SARC         | 600                          | 592                                           | 29,534,428                               | 1,071                                            | 1,794         | 1,742              | 4,607         | 88                                                       | 4,114,815                                                       |
| SKCM         | 475                          | 439                                           | 17,422,828                               | 1,539                                            | 1,802         | 1,800              | 5,141         | 87                                                       | 4,115,791                                                       |
| STAD         | 442                          | 321                                           | 11,454,111                               | 1,153                                            | 1,814         | 1,795              | 4,762         | 89                                                       | 3,942,150                                                       |
| THCA         | 519                          | 508                                           | 20,550,236                               | 1,260                                            | 1,798         | 1,797              | 4,855         | 100                                                      | 3,845,582                                                       |
| UCEC         | 566                          | 551                                           | 27,686,036                               | 1,186                                            | 1,778         | 1,805              | 4,769         | 99                                                       | 5,776,828                                                       |
| CAUM         | 538                          | 496                                           | 22,089,650                               | 1,107                                            | 1,805         | 1,816              | 4,728         | 112                                                      | 4,484,539                                                       |
| PAPE         | 563                          | 528                                           | 20,782,085                               | 990                                              | 1,777         | 1,806              | 4,573         | 89                                                       | 3,646,250                                                       |
| TTKO         | 661                          | 639                                           | 28,990,855                               | 1,372                                            | 1,753         | 1,797              | 4,922         | 110                                                      | 4,054,016                                                       |
| <b>Total</b> | <b>10,029</b>                | <b>8,888</b>                                  | <b>356,484,447</b>                       | <b>22,148</b>                                    | <b>34,186</b> | <b>34,154</b>      | <b>90,488</b> | <b>2,487</b>                                             | <b>102,538,441</b>                                              |

\*, WSIs with bubbles, overlapping tissues, poor staining, and artificial markings were excluded from consideration.

CAUM, consisting of CHOL, ACC, UCS, and MESO. PAPE, consisting of PAAD, PCPG, and ESCA. TTKO, consisting of TGCT, THYM, KICH, and OV.

**Supplementary Table 2. Distribution of patch counts across 3 cancer types in the independent test set**

| Cancer types | Total number of WSIs selected | Total number of patches in selected WSIs | Patch labeling and selection for the dataset (N) |              |                    |              |
|--------------|-------------------------------|------------------------------------------|--------------------------------------------------|--------------|--------------------|--------------|
|              |                               |                                          | TIL-positive                                     | TIL-negative | Non-tumor/necrotic | Total        |
| RUMC-BRCA    | 48                            | 1,227,542                                | 162                                              | 1,219        | 1,619              | 3,000        |
| CPTAC-LUAD   | 47                            | 1,118,817                                | 224                                              | 1,357        | 1,419              | 3,000        |
| CPTAC-LUSC   | 50                            | 973,954                                  | 291                                              | 1,769        | 940                | 3,000        |
| <b>Total</b> | <b>145</b>                    | <b>2,220,313</b>                         | <b>677</b>                                       | <b>4,345</b> | <b>3,978</b>       | <b>9,000</b> |

**Supplementary Table 3. Convolutional Autoencoder Model Architecture**

| <b>Layer(type)</b>             | <b>Output Shape</b>  | <b>Param #</b> |
|--------------------------------|----------------------|----------------|
| conv2d_616(Conv2D)             | (None, 152, 152, 32) | 896            |
| max_pooling2d_15(MaxPooling2D) | (None, 76, 76, 32)   | 0              |
| conv2d_617(Conv2D)             | (None, 76, 76, 8)    | 2312           |
| max_pooling2d_16(MaxPooling2D) | (None, 38, 38, 8)    | 0              |
| conv2d_618(Conv2D)             | (None, 38, 38, 8)    | 584            |
| max_pooling2d_17(MaxPooling2D) | (None, 19, 19, 8)    | 0              |
| conv2d_619 (Conv2D)            | (None, 19, 19, 8)    | 584            |
| up_sampling2d_3(UpSamplingg2D) | (None, 38, 38, 8)    | 0              |
| conv2d_620(Conv2D)             | (None, 38, 38, 8)    | 584            |
| up_sampling2d_4(UpSampling2D)  | (None, 76, 76, 8)    | 0              |
| conv2d_621(Conv2D)             | (None, 76, 76, 32)   | 2336           |
| up_sampling2d_5(UpSampling2D)  | (None, 152, 152, 32) | 0              |
| conv2d_622(Conv2D)             | (None, 152, 152, 3)  | 8867           |

Total params: 8,163, Trainable params: 8,163

**Supplementary Table 4. The number of selected genes at each step of the analysis (OS)**

| Cancer types | Immune-related DEGs | Stromal-related DEGs | Immune-related genes determined by WGCNA | Stromal-related genes determined by WGCNA | TME-related genes | Genes associated with survival by LASSO regression | Genes with significant (P<0.1) impact on survival (Cox univariate regression) used for establishing TME risk score |
|--------------|---------------------|----------------------|------------------------------------------|-------------------------------------------|-------------------|----------------------------------------------------|--------------------------------------------------------------------------------------------------------------------|
| BLCA         | 2244                | 1857                 | 1373                                     | 1072                                      | 619               | 6                                                  | 6                                                                                                                  |
| BRCA         | 829                 | 755                  | 6844                                     | 4749                                      | 454               | 5                                                  | 5                                                                                                                  |
| CECSC        | 1515                | 885                  | 8399                                     | 304                                       | 425               | 11                                                 | 10                                                                                                                 |
| COADREAD     | 1185                | 1808                 | 1649                                     | 1534                                      | 520               | 12                                                 | 8                                                                                                                  |
| ESCA         | 1178                | 1372                 | 302                                      | 801                                       | 374               | 10                                                 | 7                                                                                                                  |
| HNSC         | 1049                | 1189                 | 621                                      | 560                                       | 424               | 6                                                  | 6                                                                                                                  |
| KIRC         | 617                 | 374                  | 276                                      | 2452                                      | 141               | 15                                                 | 9                                                                                                                  |
| KIRP         | 893                 | 1254                 | 3241                                     | 426                                       | 161               | 8                                                  | 5                                                                                                                  |
| LIHC         | 1172                | 1459                 | 517                                      | 517                                       | 321               | 3                                                  | 3                                                                                                                  |
| LUAD         | 699                 | 773                  | 1393                                     | 1452                                      | 183               | 15                                                 | 13                                                                                                                 |
| LUSC         | 1508                | 1118                 | 3846                                     | 8517                                      | 521               | 12                                                 | 12                                                                                                                 |
| OV           | 1283                | 970                  | 713                                      | 823                                       | 378               | 8                                                  | 8                                                                                                                  |
| PAAD         | 1038                | 1502                 | 534                                      | 1319                                      | 359               | 10                                                 | 10                                                                                                                 |
| PRAD         | 1021                | 1381                 | 3065                                     | 4135                                      | 526               | -                                                  | -                                                                                                                  |
| SARC         | 2553                | 2628                 | 7857                                     | 8588                                      | 1080              | 5                                                  | 5                                                                                                                  |
| SKCM         | 1256                | 1423                 | 5894                                     | 593                                       | 406               | 13                                                 | 13                                                                                                                 |
| STAD         | 1289                | 1834                 | 387                                      | 1425                                      | 672               | 24                                                 | 13                                                                                                                 |
| THCA         | 1575                | 1077                 | 9155                                     | 5415                                      | 484               | -                                                  | -                                                                                                                  |
| UCEC         | 862                 | 675                  | 8793                                     | 4806                                      | 258               | 6                                                  | 6                                                                                                                  |

-, the number of cases where the outcome event (death) occurred by the recorded follow-up date was too small to select survival-related genes.

DEGs, Differentially expressed genes; WGCNA, Weighted gene co-expression network analysis.

**Supplementary Table 5. TME risk score for predicting the OS**

| Cancer types | TMErisk score                                                                                                                                                                                                                                                     |
|--------------|-------------------------------------------------------------------------------------------------------------------------------------------------------------------------------------------------------------------------------------------------------------------|
| BLCA         | TMErisk=0.00016*Exp(FN1)+0.00463*Exp(CERCAM)-0.00407*Exp(CD3D)+0.00767*Exp(MAP1B)-0.00873*Exp(GNLY)+0.01375*Exp(HEYL)                                                                                                                                             |
| BRCA         | TMErisk=-0.00017*Exp(CD74)+0.00029*Exp(CD14)+0.00281*Exp(MMP13)-0.00592*Exp(IRF1)-0.00914*Exp(IL2RG)                                                                                                                                                              |
| CESC         | TMErisk=0.00012*Exp(KRT81)-0.01511*Exp(TPPP3)-0.00473*Exp(LSP1)+0.00526*Exp(OLR1)-0.00957*Exp(FAM3B)-0.03242*Exp(LAG3)+0.02072*Exp(SPRY4)+0.00294*Exp(JAK3)-0.03609*Exp(BIN2)-0.02158*Exp(S1PR4)                                                                  |
| COADREAD     | TMErisk=0.00107*Exp(GPX3)+0.00087*Exp(IDO1)-0.03295*Exp(CPA3)-0.02026*Exp(CCL11)+0.05012*Exp(HEYL)+0.01659*Exp(CAV2)+0.00530*Exp(UCHL1)+0.02939*Exp(CD37)                                                                                                         |
| ESCA         | TMErisk=-0.00684*Exp(MXRA8)+0.00693*Exp(GAS1)+0.02441*Exp(RGS16)+0.00659*Exp(WIPF1)-0.00281*Exp(MFAP5)-0.02881*Exp(TWIST1)-0.03811*Exp(GPC6)                                                                                                                      |
| HNSC         | TMErisk=-0.00907*Exp(BATF)-0.01346*Exp(ATP2A3)+0.01892*Exp(FCGR2A)-0.00278*Exp(JAK3)-0.01038*Exp(CD5)-0.00494*Exp(CD27)                                                                                                                                           |
| KIRC         | TMErisk=-0.00557*Exp(APLNR)+0.00347*Exp(VSIG4)-0.02028*Exp(PPARGC1A)+0.00324*Exp(TNFSF13B)+0.01799*Exp(LIMD2)-0.00444*Exp(FMNL1)-0.00300*Exp(LAG3)-0.00840*Exp(FCGR1A)+0.00341*Exp(LILRB3)                                                                        |
| KIRP         | TMErisk=-0.01174*Exp(TREM2)+0.03478*Exp(TBXAS1)+0.03092*Exp(LIMD2)-0.01637*Exp(PDE6G)+0.07458*Exp(GNB4)                                                                                                                                                           |
| LIHC         | TMErisk=0.00120*Exp(FCER1G)+0.00635*Exp(CSF1)-0.03463*Exp(CLEC3B)                                                                                                                                                                                                 |
| LUAD         | TMErisk=0.00002*Exp(HLA_DRA)-0.00005*Exp(CD74)-0.00012*Exp(HLA_DRB5)+0.00045*Exp(COL6A2)-0.00154*Exp(LCP1)+0.00021*Exp(SERPINE1)+0.00233*Exp(PSMB9)+0.00249*Exp(GBP1)-0.00440*Exp(HLA_DMB)+0.00468*Exp(AXL)-0.00506*Exp(MNDA)-0.00720*Exp(MS4A7)+0.00322*Exp(LOX) |
| LUSC         | TMErisk=0.000082*Exp(HLA_B)+0.004049*Exp(CCL13)+0.002849*Exp(IL4I1)+0.002198*Exp(ACSL5)+0.003987*Exp(ALDH3B1)+0.006587*Exp(RND1)+0.008855*Exp(IL36RN)+0.02400*Exp(DERL3)+0.000843*Exp(TGM2)+0.001222*Exp(C11orf96)-0.002347*Exp(CCDC69)+0.009483*Exp(PTGIS)       |
| OV           | TMErisk=0.00136*Exp(TGFBI)-0.00171*Exp(PSMB9)+0.00416*Exp(VSIG4)-0.00318*Exp(CXCL9)-0.00370*Exp(CXCL11)+0.00770*Exp(CCDC80)+0.00006*Exp(CILP2)-0.02623*Exp(SELL)                                                                                                  |
| PAAD         | TMErisk=-0.00016*Exp(FN1)+0.00275*Exp(CLIC4)-0.00527*Exp(ANXA6)+0.00340*Exp(LTBP1)+0.00121*Exp(INHBA)+0.01324*Exp(LOX)-0.00452*Exp(PIM2)-0.00582*Exp(FOXA2)-0.00069*Exp(NGFR)-0.03481*Exp(ATP8B2)                                                                 |
| PRAD         | -                                                                                                                                                                                                                                                                 |
| SARC         | TMErisk=0.00087*Exp(MARCKS)+0.00224*Exp(MYH10)-0.01294*Exp(SECTM1)+0.01238*Exp(TNFSF4)+0.00341*Exp(PRSS35)                                                                                                                                                        |
| SKCM         | TMErisk=-0.00033*Exp(FCER1G)+0.00033*Exp(BCAN)-0.00009*Exp(HLA_DQB1)+0.00104*Exp(KIT)-0.00019*Exp(PIM2)-0.00201*Exp(GBP4)-0.00544*Exp(UBA7)-0.00168*Exp(MZB1)-0.00008*Exp(PARP12)-0.00235*Exp(CCL8)-0.00427*Exp(APOBEC3G)-0.00296*Exp(CLIC2)-0.01018*Exp(TLR2)    |
| STAD         | TMErisk=0.00560*Exp(AXL)+0.00409*Exp(MS4A4A)+0.00625*Exp(LY96)-0.00017*Exp(DUSP1)+0.00154*Exp(GPNMB)+0.00316*Exp(VWF)+0.00200*Exp(CXCR4)-0.00430*Exp(SDC2)+0.00235*Exp(RGS1)-0.00013*Exp(KIT)+0.00486*Exp(BASP1)-0.06861*Exp(PDCD1)-0.01298*Exp(FERMT3)           |
| THCA         | -                                                                                                                                                                                                                                                                 |
| UCEC         | TMErisk=0.00153*Exp(ELN)+0.00216*Exp(LRRN2)+0.00474*Exp(TMSB15A)-0.01609*Exp(BATF)+0.00107*Exp(FOXO6)+0.01243*Exp(SIX1)                                                                                                                                           |

TMErisk score=  $\sum \beta_i * \text{Exp}(i)$ ;  $\beta_i$ , risk coefficient of gene  $i$ ;  $\text{Exp}(i)$ , Expression value of gene  $i$ .

-, the number of cases where the outcome event (death) occurred by the recorded follow-up date was too small to establish the TMErisk score.

**Supplementary Table 6. The number of selected genes at each step of the analysis (DSS)**

| <b>Cancer types</b> | <b>Immune-related DEGs</b> | <b>Stromal-related DEGs</b> | <b>Immune-related genes determined by WGCNA</b> | <b>Stromal-related genes determined by WGCNA</b> | <b>TME-related genes</b> | <b>Genes associated with survival by LASSO regression</b> | <b>Genes with significant (P&lt;0.1) impact on survival (Cox univariate regression) used for establishing TME risk score</b> |
|---------------------|----------------------------|-----------------------------|-------------------------------------------------|--------------------------------------------------|--------------------------|-----------------------------------------------------------|------------------------------------------------------------------------------------------------------------------------------|
| BLCA                | 1664                       | 1857                        | 1373                                            | 1072                                             | 573                      | 27                                                        | 16                                                                                                                           |
| BRCA                | 829                        | 755                         | 6844                                            | 4749                                             | 454                      | 10                                                        | 10                                                                                                                           |
| CESC                | 1498                       | 885                         | 8399                                            | 304                                              | 432                      | 12                                                        | 12                                                                                                                           |
| COADREAD            | 1155                       | 1808                        | 1649                                            | 1534                                             | 519                      | 9                                                         | 8                                                                                                                            |
| ESCA                | 1009                       | 1219                        | 302                                             | 801                                              | 375                      | 5                                                         | 5                                                                                                                            |
| HNSC                | 1061                       | 1251                        | 621                                             | 560                                              | 416                      | 10                                                        | 10                                                                                                                           |
| KIRC                | 617                        | 368                         | 276                                             | 2452                                             | 140                      | 18                                                        | 11                                                                                                                           |
| KIRP                | 819                        | 1177                        | 3241                                            | 426                                              | 159                      | 9                                                         | 9                                                                                                                            |
| LIHC                | 1164                       | 2453                        | 517                                             | 517                                              | 439                      | 1                                                         | 1                                                                                                                            |
| LUAD                | 853                        | 773                         | 1393                                            | 1452                                             | 197                      | 14                                                        | 10                                                                                                                           |
| LUSC                | 1214                       | 1118                        | 3846                                            | 8517                                             | 455                      | 3                                                         | 3                                                                                                                            |
| OV                  | 1309                       | 1159                        | 713                                             | 823                                              | 351                      | 11                                                        | 11                                                                                                                           |
| PAAD                | 1059                       | 1509                        | 534                                             | 1319                                             | 373                      | 12                                                        | 7                                                                                                                            |
| PRAD                | 897                        | 1388                        | 3065                                            | 4135                                             | 503                      | -                                                         | -                                                                                                                            |
| SARC                | 2608                       | 2628                        | 7857                                            | 8588                                             | 1086                     | 5                                                         | 5                                                                                                                            |
| SKCM                | 1336                       | 1485                        | 5894                                            | 593                                              | 460                      | 18                                                        | 14                                                                                                                           |
| STAD                | 1255                       | 1881                        | 387                                             | 1425                                             | 663                      | 6                                                         | 6                                                                                                                            |

-, the number of cases where the outcome event (death) occurred by the recorded follow-up date was too small to select survival-related genes. DEGs, differentially expressed genes; WGCNA, weighted gene co-expression network analysis.

Supplementary Table 7. TME risk score for predicting DSS

| Cancer types | TMErisk score                                                                                                                                                                                                                                                                                                                                                                                                                                                                                                                                                  |
|--------------|----------------------------------------------------------------------------------------------------------------------------------------------------------------------------------------------------------------------------------------------------------------------------------------------------------------------------------------------------------------------------------------------------------------------------------------------------------------------------------------------------------------------------------------------------------------|
| BLCA         | $\text{TMErisk}=0.00028*\text{Exp}(\text{FN1})-0.00084*\text{Exp}(\text{HLA\_DMA})-0.00164*\text{Exp}(\text{IL32})+0.00212*\text{Exp}(\text{CERCAM})-0.00517*\text{Exp}(\text{RGS1})-0.00091*\text{Exp}(\text{GBP4})+0.00236*\text{Exp}(\text{STC1})-0.03849*\text{Exp}(\text{IL3RA})+0.00189*\text{Exp}(\text{MAP1B})-0.01227*\text{Exp}(\text{GNLY})+0.02770*\text{Exp}(\text{HEYL})+0.00400*\text{Exp}(\text{CSF2RB})-0.00891*\text{Exp}(\text{TMC8})-0.02753*\text{Exp}(\text{TMC7})+0.01574*\text{Exp}(\text{SLC9A9})-0.04968*\text{Exp}(\text{PLEKHH1})$ |
| BRCA         | $\text{TMErisk}=-0.00014*\text{Exp}(\text{CD74})-0.00069*\text{Exp}(\text{STC2})-0.00171*\text{Exp}(\text{C3})+0.00105*\text{Exp}(\text{EEF1A2})-0.00763*\text{Exp}(\text{ELOVL2})-0.00611*\text{Exp}(\text{APOBEC3C})+0.00247*\text{Exp}(\text{MMP13})-0.00774*\text{Exp}(\text{APOL3})+0.00227*\text{Exp}(\text{NR2F1})+0.02463*\text{Exp}(\text{PCDH18})$                                                                                                                                                                                                   |
| CESC         | $\text{TMErisk}=0.00077*\text{Exp}(\text{CXCL8})-0.02580*\text{Exp}(\text{TPPP3})-0.00799*\text{Exp}(\text{LSP1})+0.00522*\text{Exp}(\text{OLR1})-0.03629*\text{Exp}(\text{LAG3})+0.00056*\text{Exp}(\text{SCX})+0.02509*\text{Exp}(\text{SPRY4})-0.01349*\text{Exp}(\text{FGL2})+0.03586*\text{Exp}(\text{JAK3})-0.03717*\text{Exp}(\text{PILRA})-0.01890*\text{Exp}(\text{BIN2})-0.05171*\text{Exp}(\text{S1PR4})$                                                                                                                                           |
| COADREAD     | $\text{TMErisk}=0.00198*\text{Exp}(\text{IGFBP6})-0.04116*\text{Exp}(\text{CCL11})+0.00154*\text{Exp}(\text{CX3CL1})+0.01281*\text{Exp}(\text{CAV2})+0.03236*\text{Exp}(\text{ENPP2})-0.00049*\text{Exp}(\text{CALB2})+0.01611*\text{Exp}(\text{UCHL1})+0.02268*\text{Exp}(\text{CD37})$                                                                                                                                                                                                                                                                       |
| ESCA         | $\text{TMErisk}=0.00211*\text{Exp}(\text{RGS2})+0.01153*\text{Exp}(\text{GAS1})+0.00428*\text{Exp}(\text{RGS16})+0.01302*\text{Exp}(\text{PRSS23})+0.01229*\text{Exp}(\text{GPR34})$                                                                                                                                                                                                                                                                                                                                                                           |
| HNSC         | $\text{TMErisk}=0.00089*\text{Exp}(\text{FHL1})+0.000004*\text{Exp}(\text{PIM2})+0.00337*\text{Exp}(\text{BATF})-0.01006*\text{Exp}(\text{CMPK2})+0.01554*\text{Exp}(\text{NRP1})+0.01498*\text{Exp}(\text{FCGR2A})+0.01389*\text{Exp}(\text{VSIG4})-0.04944*\text{Exp}(\text{GALM})-0.03507*\text{Exp}(\text{CYTIP})-0.03603*\text{Exp}(\text{CCR7})$                                                                                                                                                                                                         |
| KIRC         | $\text{TMErisk}=0.00188*\text{Exp}(\text{FCER1G})-0.00524*\text{Exp}(\text{COL15A1})-0.03422*\text{Exp}(\text{PPARGC1A})+0.00836*\text{Exp}(\text{TNFSF13B})+0.00475*\text{Exp}(\text{LIMD2})+0.01787*\text{Exp}(\text{FMNL1})-0.00116*\text{Exp}(\text{BATF})+0.01930*\text{Exp}(\text{MILR1})-0.08322*\text{Exp}(\text{SIGLEC8})+0.01498*\text{Exp}(\text{TRPM2})-0.00554*\text{Exp}(\text{LILRB3})$                                                                                                                                                         |
| KIRP         | $\text{TMErisk}=0.01948*\text{Exp}(\text{TBXAS1})-0.07482*\text{Exp}(\text{TLR2})+0.03275*\text{Exp}(\text{LIMD2})+0.10984*\text{Exp}(\text{ADORA3})+0.08566*\text{Exp}(\text{TRPV2})-0.34634*\text{Exp}(\text{SIGLEC8})-0.09125*\text{Exp}(\text{CD300LF})-0.10120*\text{Exp}(\text{PRAM1})+0.16481*\text{Exp}(\text{GNB4})$                                                                                                                                                                                                                                  |
| LIHC         | $\text{TMErisk}=-0.07184*\text{Exp}(\text{CLEC3B})$                                                                                                                                                                                                                                                                                                                                                                                                                                                                                                            |
| LUAD         | $\text{TMErisk}=-0.00022*\text{Exp}(\text{HLA\_DRB5})-0.00125*\text{Exp}(\text{LCP1})+0.00030*\text{Exp}(\text{SERPINE1})-0.00259*\text{Exp}(\text{DCN})+0.00422*\text{Exp}(\text{GBP1})-0.00444*\text{Exp}(\text{PRELP})+0.00521*\text{Exp}(\text{AXL})+0.01338*\text{Exp}(\text{LOX})-0.00697*\text{Exp}(\text{CLEC7A})-0.01724*\text{Exp}(\text{PILRA})$                                                                                                                                                                                                    |
| LUSC         | $\text{TMErisk}=0.00160*\text{Exp}(\text{TGM2})+0.00053*\text{Exp}(\text{MMP9})+0.02040*\text{Exp}(\text{VEGFC})$                                                                                                                                                                                                                                                                                                                                                                                                                                              |
| OV           | $\text{TMErisk}=0.00049*\text{Exp}(\text{TGFBI})-0.00149*\text{Exp}(\text{TAP1})+0.00150*\text{Exp}(\text{VSIG4})-0.00929*\text{Exp}(\text{CXCL11})+0.00693*\text{Exp}(\text{CCDC80})-0.00163*\text{Exp}(\text{C5AR1})+0.00756*\text{Exp}(\text{PODNL1})+0.02058*\text{Exp}(\text{MS4A7})+0.00782*\text{Exp}(\text{MILR1})-0.00971*\text{Exp}(\text{IL2RG})-0.03008*\text{Exp}(\text{SELL})$                                                                                                                                                                   |
| PAAD         | $\text{TMErisk}=0.00025*\text{Exp}(\text{FN1})+0.00031*\text{Exp}(\text{SERPINE1})+0.00200*\text{Exp}(\text{RGS16})-0.00060*\text{Exp}(\text{INHBA})+0.00063*\text{Exp}(\text{LOX})-0.00373*\text{Exp}(\text{FOXA2})+0.00278*\text{Exp}(\text{MDFIC})$                                                                                                                                                                                                                                                                                                         |
| PRAD         | -                                                                                                                                                                                                                                                                                                                                                                                                                                                                                                                                                              |
| SARC         | $\text{TMErisk}=0.00109*\text{Exp}(\text{ALPL})+0.00100*\text{Exp}(\text{LOX})+0.00075*\text{Exp}(\text{DRAM1})-0.02212*\text{Exp}(\text{SECTM1})+0.01243*\text{Exp}(\text{TNFSF4})$                                                                                                                                                                                                                                                                                                                                                                           |
| SKCM         | $\text{TMErisk}=-0.00024*\text{Exp}(\text{FCER1G})+0.00041*\text{Exp}(\text{BCAN})+0.00015*\text{Exp}(\text{PSMB8})+0.00019*\text{Exp}(\text{APOL1})-0.00174*\text{Exp}(\text{GBP4})-0.0052*\text{Exp}(\text{UBA7})-0.0019*\text{Exp}(\text{MZB1})-0.00364*\text{Exp}(\text{CD40})-0.00505*\text{Exp}(\text{BATF2})-0.00464*\text{Exp}(\text{KIAA0040})-0.00234*\text{Exp}(\text{C2})-0.00343*\text{Exp}(\text{CCL8})-0.00177*\text{Exp}(\text{CLIC2})-0.00881*\text{Exp}(\text{TLR2})$                                                                        |
| STAD         | $\text{TMErisk}=0.00120*\text{Exp}(\text{CXCR4})+0.01129*\text{Exp}(\text{GLIS2})+0.00792*\text{Exp}(\text{SSPN})+0.00700*\text{Exp}(\text{SELP})+0.00698*\text{Exp}(\text{RASSF8})+0.00530*\text{Exp}(\text{C4B})$                                                                                                                                                                                                                                                                                                                                            |
| THCA         | -                                                                                                                                                                                                                                                                                                                                                                                                                                                                                                                                                              |

UCEC

$$\text{TMErisk} = 0.00076 * \text{Exp}(\text{APOL1}) + 0.00008 * \text{Exp}(\text{SST}) + 0.00455 * \text{Exp}(\text{COL6A3}) + 0.00129 * \text{Exp}(\text{FAM107A}) + 0.00580 * \text{Exp}(\text{CD52}) + 0.00197 * \text{Exp}(\text{ELN}) + 0.00089 * \text{Exp}(\text{LRRN2}) - 0.02382 * \text{Exp}(\text{LRP4}) + 0.00966 * \text{Exp}(\text{SERPINE1}) - 0.00420 * \text{Exp}(\text{BATF}) - 0.02356 * \text{Exp}(\text{CD79A}) - 0.01184 * \text{Exp}(\text{LSP1}) + 0.00549 * \text{Exp}(\text{FOXO6}) + 0.00804 * \text{Exp}(\text{SIX1}) - 0.06629 * \text{Exp}(\text{APOBR})$$

---

TMErisk score =  $\sum \beta_i * \text{Exp}(i)$ ;  $\beta_i$ , risk coefficient of gene  $i$ ;  $\text{Exp}(i)$ , Expression value of gene  $i$ .

-, the number of cases where the outcome event (death) occurred by the recorded follow-up date was too small to establish the TMErisk score.

**Supplementary Table 8. The number of selected genes at each step of the analysis (PFI)**

| <b>Cancer types</b> | <b>Immune-related DEGs</b> | <b>Stromal-related DEGs</b> | <b>Immune-related genes determined by WGCNA</b> | <b>Stromal-related genes determined by WGCNA</b> | <b>TME-related genes</b> | <b>Genes associated with survival by LASSO regression</b> | <b>Genes with significant (P&lt;0.1) impact on survival (Cox univariate regression) used for establishing TME risk score</b> |
|---------------------|----------------------------|-----------------------------|-------------------------------------------------|--------------------------------------------------|--------------------------|-----------------------------------------------------------|------------------------------------------------------------------------------------------------------------------------------|
| BLCA                | 1668                       | 1860                        | 1373                                            | 1072                                             | 573                      | 20                                                        | 16                                                                                                                           |
| BRCA                | 838                        | 943                         | 6844                                            | 4749                                             | 506                      | 19                                                        | 17                                                                                                                           |
| CESC                | 1546                       | 885                         | 8399                                            | 304                                              | 439                      | 10                                                        | 10                                                                                                                           |
| COADREAD            | 1188                       | 1837                        | 1649                                            | 1534                                             | 522                      | 9                                                         | 9                                                                                                                            |
| ESCA                | 1007                       | 1234                        | 302                                             | 801                                              | 389                      | -                                                         | -                                                                                                                            |
| HNSC                | 1067                       | 1170                        | 621                                             | 560                                              | 420                      | 12                                                        | 9                                                                                                                            |
| KIRC                | 623                        | 374                         | 276                                             | 2452                                             | 129                      | 26                                                        | 16                                                                                                                           |
| KIRP                | 842                        | 1126                        | 3241                                            | 426                                              | 157                      | 13                                                        | 9                                                                                                                            |
| LIHC                | 1177                       | 1313                        | 517                                             | 517                                              | 305                      | 1                                                         | 1                                                                                                                            |
| LUAD                | 865                        | 775                         | 1393                                            | 1452                                             | 198                      | 11                                                        | 10                                                                                                                           |
| LUSC                | 1214                       | 1118                        | 3846                                            | 8517                                             | 455                      | 14                                                        | 10                                                                                                                           |
| OV                  | 1309                       | 1080                        | 713                                             | 823                                              | 371                      | 11                                                        | 10                                                                                                                           |
| PAAD                | 955                        | 1511                        | 534                                             | 1319                                             | 377                      | 12                                                        | 6                                                                                                                            |
| PRAD                | 884                        | 1230                        | 3065                                            | 4135                                             | 445                      | 7                                                         | 7                                                                                                                            |
| SARC                | 2539                       | 2751                        | 7857                                            | 8588                                             | 1134                     | 20                                                        | 18                                                                                                                           |
| SKCM                | 1192                       | 1440                        | 5894                                            | 593                                              | 402                      | 8                                                         | 8                                                                                                                            |
| STAD                | 1346                       | 1902                        | 387                                             | 1425                                             | 665                      | 20                                                        | 10                                                                                                                           |
| THCA                | 1477                       | 1058                        | 9155                                            | 5415                                             | 440                      | 16                                                        | 13                                                                                                                           |
| UCEC                | 969                        | 671                         | 8793                                            | 4806                                             | 270                      | 10                                                        | 10                                                                                                                           |

-, the number of cases where the outcome event (disease progression) occurred by the recorded follow-up date was too small to select survival-related genes.  
DEGs, differentially expressed genes; WGCNA, weighted gene co-expression network analysis.

Supplementary Table 9. TMErisk score for predicting PFI

| Cancer types | TMErisk score                                                                                                                                                                                                                                                                                                                                                                                                                                                                                                                                                                                                                                                                                                    |
|--------------|------------------------------------------------------------------------------------------------------------------------------------------------------------------------------------------------------------------------------------------------------------------------------------------------------------------------------------------------------------------------------------------------------------------------------------------------------------------------------------------------------------------------------------------------------------------------------------------------------------------------------------------------------------------------------------------------------------------|
| BLCA         | $\text{TMErisk} = 0.00027 * \text{Exp}(\text{FN1}) + 0.00120 * \text{Exp}(\text{CERCAM}) - 0.00646 * \text{Exp}(\text{RGS1}) - 0.00365 * \text{Exp}(\text{GBP4}) + 0.00414 * \text{Exp}(\text{LTBP2}) + 0.00226 * \text{Exp}(\text{STC1}) + 0.00235 * \text{Exp}(\text{CD3D}) - 0.00385 * \text{Exp}(\text{LOXL2}) - 0.01082 * \text{Exp}(\text{ODF3B}) - 0.00377 * \text{Exp}(\text{HLA\_DMB}) - 0.03204 * \text{Exp}(\text{IL3RA}) - 0.00227 * \text{Exp}(\text{CD7}) + 0.01876 * \text{Exp}(\text{HEYL}) - 0.02776 * \text{Exp}(\text{TMC7}) + 0.02300 * \text{Exp}(\text{GNB4}) + 0.03216 * \text{Exp}(\text{ARHGAP31})$                                                                                     |
| BRCA         | $\text{TMErisk} = -0.00007 * \text{Exp}(\text{CD74}) - 0.00050 * \text{Exp}(\text{STC2}) + 0.00355 * \text{Exp}(\text{GPX3}) - 0.00069 * \text{Exp}(\text{ESR1}) - 0.00067 * \text{Exp}(\text{HLA\_DPB1}) + 0.00097 * \text{Exp}(\text{EEF1A2}) + 0.00109 * \text{Exp}(\text{RNASE6}) - 0.0035 * \text{Exp}(\text{ELOVL2}) - 0.00724 * \text{Exp}(\text{PSMB9}) + 0.00162 * \text{Exp}(\text{MMP13}) - 0.02003 * \text{Exp}(\text{ENPP2}) - 0.00222 * \text{Exp}(\text{CST7}) + 0.00601 * \text{Exp}(\text{RF1}) + 0.00597 * \text{Exp}(\text{TFCP2L1}) + 0.00049 * \text{Exp}(\text{VMO1}) + 0.00882 * \text{Exp}(\text{GPC6}) - 0.01702 * \text{Exp}(\text{LGALS2})$                                           |
| CESC         | $\text{TMErisk} = 0.00156 * \text{Exp}(\text{TSPAN13}) + 0.00414 * \text{Exp}(\text{PCOLCE}) - 0.00881 * \text{Exp}(\text{LAG3}) + 0.01023 * \text{Exp}(\text{SORL1}) + 0.02163 * \text{Exp}(\text{TNFRSF10D}) + 0.00423 * \text{Exp}(\text{MLLT11}) + 0.00747 * \text{Exp}(\text{JAK3}) - 0.03623 * \text{Exp}(\text{IKZF3}) - 0.01411 * \text{Exp}(\text{BIN2}) - 0.06712 * \text{Exp}(\text{S1PR4})$                                                                                                                                                                                                                                                                                                          |
| COADREAD     | $\text{TMErisk} = 0.00090 * \text{Exp}(\text{CXCL5}) + 0.00122 * \text{Exp}(\text{CAV1}) + 0.00512 * \text{Exp}(\text{NKD1}) - 0.06277 * \text{Exp}(\text{FGL2}) + 0.02730 * \text{Exp}(\text{HEYL}) + 0.01386 * \text{Exp}(\text{VIP}) + 0.00087 * \text{Exp}(\text{CAV2}) + 0.00985 * \text{Exp}(\text{CALB2}) + 0.01587 * \text{Exp}(\text{UCHL1})$                                                                                                                                                                                                                                                                                                                                                           |
| ESCA         | -                                                                                                                                                                                                                                                                                                                                                                                                                                                                                                                                                                                                                                                                                                                |
| HNSC         | $\text{TMErisk} = 0.00010 * \text{Exp}(\text{FN1}) + 0.00209 * \text{Exp}(\text{COX7A1}) - 0.01219 * \text{Exp}(\text{COL8A2}) - 0.01359 * \text{Exp}(\text{RGS5}) - 0.01361 * \text{Exp}(\text{CMPK2}) - 0.00644 * \text{Exp}(\text{ATP2A3}) + 0.03697 * \text{Exp}(\text{NRP1}) - 0.01262 * \text{Exp}(\text{CYTIP}) - 0.00165 * \text{Exp}(\text{JAK3})$                                                                                                                                                                                                                                                                                                                                                      |
| KIRC         | $\text{TMErisk} = 0.00056 * \text{Exp}(\text{FCER1G}) - 0.00213 * \text{Exp}(\text{COL15A1}) + 0.00040 * \text{Exp}(\text{VSIG4}) + 0.00413 * \text{Exp}(\text{RAC2}) - 0.00361 * \text{Exp}(\text{KIT}) - 0.01039 * \text{Exp}(\text{PPARGC1A}) - 0.00285 * \text{Exp}(\text{LAIR1}) + 0.01106 * \text{Exp}(\text{TNFSF13B}) + 0.00238 * \text{Exp}(\text{LIMD2}) + 0.04900 * \text{Exp}(\text{FMNL1}) + 0.00925 * \text{Exp}(\text{BATF}) - 0.10535 * \text{Exp}(\text{SPN}) - 0.00359 * \text{Exp}(\text{MILR1}) + 0.00110 * \text{Exp}(\text{CD72}) + 0.00265 * \text{Exp}(\text{FCGR1A}) - 0.00496 * \text{Exp}(\text{LILRB3})$                                                                             |
| KIRP         | $\text{TMErisk} = 0.00733 * \text{Exp}(\text{RGS10}) + 0.03928 * \text{Exp}(\text{TBXAS1}) + 0.04831 * \text{Exp}(\text{LHFPL2}) + 0.01960 * \text{Exp}(\text{LIMD2}) - 0.10125 * \text{Exp}(\text{OSCAR}) - 0.04344 * \text{Exp}(\text{KCNJ5}) - 0.06031 * \text{Exp}(\text{SIGLEC8}) + 0.02796 * \text{Exp}(\text{CSF2RA}) + 0.02828 * \text{Exp}(\text{GNB4})$                                                                                                                                                                                                                                                                                                                                                |
| LIHC         | $\text{TMErisk} = -0.04613 * \text{Exp}(\text{CLEC3B})$                                                                                                                                                                                                                                                                                                                                                                                                                                                                                                                                                                                                                                                          |
| LUAD         | $\text{TMErisk} = -0.00001 * \text{Exp}(\text{CD74}) - 0.00012 * \text{Exp}(\text{HLA\_DRB5}) - 0.00023 * \text{Exp}(\text{HLA\_DQB1}) + 0.00008 * \text{Exp}(\text{HLA\_DQA1}) - 0.00157 * \text{Exp}(\text{LCP1}) + 0.00047 * \text{Exp}(\text{SERPINE1}) + 0.00436 * \text{Exp}(\text{GBP1}) - 0.00510 * \text{Exp}(\text{PRELP}) + 0.009479 * \text{Exp}(\text{LOX}) + 0.00913 * \text{Exp}(\text{CLEC7A}) - 0.01067 * \text{Exp}(\text{PILRA})$                                                                                                                                                                                                                                                             |
| LUSC         | $\text{TMErisk} = -0.00008 * \text{Exp}(\text{NTS}) - 0.00034 * \text{Exp}(\text{GSTA1}) + 0.00196 * \text{Exp}(\text{TGM2}) + 0.00039 * \text{Exp}(\text{MMP9}) - 0.00118 * \text{Exp}(\text{MMP13}) + 0.00060 * \text{Exp}(\text{MARCO}) - 0.00277 * \text{Exp}(\text{CD79A}) + 0.00398 * \text{Exp}(\text{BARX1}) + 0.00162 * \text{Exp}(\text{SBK1}) + 0.01770 * \text{Exp}(\text{VEGFC})$                                                                                                                                                                                                                                                                                                                   |
| OV           | $\text{TMErisk} = 0.00132 * \text{Exp}(\text{NBL1}) + 0.000448 * \text{Exp}(\text{TGFBI}) - 0.00321 * \text{Exp}(\text{GPNMB}) - 0.00212 * \text{Exp}(\text{TAP1}) + 0.00471 * \text{Exp}(\text{VSIG4}) - 0.00083 * \text{Exp}(\text{CXCL9}) + 0.00186 * \text{Exp}(\text{RGS2}) + 0.01134 * \text{Exp}(\text{STAB1}) + 0.00881 * \text{Exp}(\text{LRRN4}) - 0.04908 * \text{Exp}(\text{IRF8})$                                                                                                                                                                                                                                                                                                                  |
| PAAD         | $\text{TMErisk} = 9.72E-05 * \text{Exp}(\text{FN1}) + 0.00052 * \text{Exp}(\text{SERPINE1}) - 0.00011 * \text{Exp}(\text{LOX}) - 0.00658 * \text{Exp}(\text{FOXA2}) - 0.01339 * \text{Exp}(\text{FHL1}) + 0.00919 * \text{Exp}(\text{FRMD6})$                                                                                                                                                                                                                                                                                                                                                                                                                                                                    |
| PRAD         | $\text{TMErisk} = 0.00134 * \text{Exp}(\text{SPOCK3}) + 0.01845 * \text{Exp}(\text{FAM83D}) * 0.00874 * \text{Exp}(\text{TREM2}) - 0.05839 * \text{Exp}(\text{PCDH18}) + 0.04124 * \text{Exp}(\text{ARHGAP4}) - 0.06193 * \text{Exp}(\text{FAIM2}) + 0.06243 * \text{Exp}(\text{FOXS1})$                                                                                                                                                                                                                                                                                                                                                                                                                         |
| SARC         | $\text{TMErisk} = -0.00017 * \text{Exp}(\text{DES}) + 0.00114 * \text{Exp}(\text{ENO2}) + 0.00242 * \text{Exp}(\text{LOX}) + 0.00142 * \text{Exp}(\text{PDPN}) + 0.00139 * \text{Exp}(\text{LTBP2}) - 0.01127 * \text{Exp}(\text{SIX2}) - 0.02322 * \text{Exp}(\text{CD40}) - 0.01150 * \text{Exp}(\text{OCIAD2}) + 0.00324 * \text{Exp}(\text{HEY2}) + 0.02726 * \text{Exp}(\text{ARHGAP33}) + 0.00433 * \text{Exp}(\text{TNFSF4}) - 0.00398 * \text{Exp}(\text{SERTAD4}) + 0.00447 * \text{Exp}(\text{ADAMTS12}) + 0.02554 * \text{Exp}(\text{TNFSF13B}) + 0.01721 * \text{Exp}(\text{ZNF700}) - 0.01348 * \text{Exp}(\text{PTGER3}) - 0.03261 * \text{Exp}(\text{HOXD4}) - 0.00845 * \text{Exp}(\text{CDON})$ |

|      |                                                                                                                                                                                                                                                                    |
|------|--------------------------------------------------------------------------------------------------------------------------------------------------------------------------------------------------------------------------------------------------------------------|
| SKCM | TMErisk=0.00026*Exp(BCAN)-0.00080*Exp(GBP4)-0.00399*Exp(UBA7)-0.00103*Exp(MARCO)-0.00263*Exp(PARP12)-0.00632*Exp(LMO2)-0.00668* Exp(ABCG1)-0.00049* Exp(TNFSF13B)                                                                                                  |
| STAD | TMErisk=0.00036*Exp(CCL21)+0.00027*Exp(NNMT)-0.00021*Exp(CCL19)+ 0.00120*Exp(AXL)+ 0.00216*Exp(SELL)+ 0.01215*Exp(GLIS2)+ 0.00251*Exp(PCDH7)+0.00435* Exp(FOXS1)+0.00842* Exp(SSPN)+0.00199* Exp(RASSF8)                                                           |
| THCA | TMErisk=0.00003*Exp(FN1)+0.00007*Exp(S100A4)-0.01458*Exp(APOD)+ 0.00454*Exp(MMP9)+ 0.00359*Exp(PASK)+ 0.00370*Exp(MUC21)- 0.04602*Exp(SRPX)+0.01539*Exp(SCGB2A1)+0.02050*Exp(TGFB3)-0.04294*Exp(CPXM2)-0.07382*Exp(ABCG2)+ 0.02140*Exp(C2CD4A)+ 0.01114*Exp(TREM1) |
| UCEC | TMErisk=0.00004*Exp(SST)+0.00097*Exp(HMOX1)-0.00366*Exp(CST7)+0.00578*Exp(EFEMP1)+0.00276*Exp(KIF1A)-0.00213*Exp(LSP1)- 0.02138*Exp(GYPC)+0.00588* Exp(FOXO6)+0.01521* Exp(SEMA6A)-0.02420* Exp(APOBR)                                                             |

---

TMErisk score=  $\sum \beta_i * \text{Exp}(i)$ ;  $\beta_i$ , risk coefficient of gene  $i$ ;  $\text{Exp}(i)$ , Expression value of gene  $i$ .

-, the number of cases where the outcome event (disease progression) occurred by the recorded follow-up date was too small to establish the TMErisk score.

**Supplementary Table 10. Performance comparison for model selection**

| Model                      |                   | Accuracy      | Kappa         | AUC           |        |        |        | Precision     |        |        |        | Recall        |        |        |        | Specificity   |        |        |        | F1 score      |        |        |        |
|----------------------------|-------------------|---------------|---------------|---------------|--------|--------|--------|---------------|--------|--------|--------|---------------|--------|--------|--------|---------------|--------|--------|--------|---------------|--------|--------|--------|
|                            |                   |               |               | A             | P      | N      | O      | A             | P      | N      | O      | A             | P      | N      | O      | A             | P      | N      | O      | A             | P      | N      | O      |
| InceptionResNetV2          | T                 | 0.9878        | 0.9814        | 0.9996        | 0.9996 | 0.9995 | 0.9997 | 0.9879        | 0.9896 | 0.9844 | 0.9902 | 0.9878        | 0.9817 | 0.9898 | 0.9899 | 0.9933        | 0.9967 | 0.9905 | 0.9941 | 0.9878        | 0.9856 | 0.9871 | 0.9901 |
|                            | V                 | <b>0.9838</b> | <b>0.9753</b> | 0.9989        | 0.9994 | 0.9986 | 0.9990 | 0.9838        | 0.9891 | 0.9794 | 0.9849 | 0.9838        | 0.9797 | 0.9850 | 0.9854 | 0.9909        | 0.9965 | 0.9874 | 0.9909 | 0.9838        | 0.9844 | 0.9822 | 0.9852 |
| VGG16                      | T                 | 0.9799        | 0.9693        | 0.9988        | 0.9995 | 0.9985 | 0.9986 | 0.9799        | 0.9870 | 0.9745 | 0.9807 | 0.9799        | 0.9839 | 0.9797 | 0.9775 | 0.9887        | 0.9958 | 0.9844 | 0.9883 | 0.9799        | 0.9854 | 0.9771 | 0.9791 |
|                            | V                 | 0.9688        | 0.9523        | 0.9971        | 0.9987 | 0.9963 | 0.9968 | 0.9688        | 0.9793 | 0.9615 | 0.9693 | 0.9688        | 0.9714 | 0.9661 | 0.9697 | 0.9825        | 0.9934 | 0.9765 | 0.9814 | 0.9688        | 0.9753 | 0.9638 | 0.9695 |
| VGG19                      | T                 | 0.9730        | 0.9587        | 0.9979        | 0.9991 | 0.9974 | 0.9977 | 0.9730        | 0.9747 | 0.9703 | 0.9745 | 0.9730        | 0.9813 | 0.9695 | 0.9710 | 0.9854        | 0.9917 | 0.9820 | 0.9846 | 0.9730        | 0.9779 | 0.9699 | 0.9728 |
|                            | V                 | 0.9587        | 0.9369        | 0.9954        | 0.9980 | 0.9941 | 0.9951 | 0.9587        | 0.9643 | 0.9529 | 0.9608 | 0.9587        | 0.9691 | 0.9538 | 0.9567 | 0.9774        | 0.9884 | 0.9714 | 0.9763 | 0.9587        | 0.9667 | 0.9533 | 0.9588 |
| ResNet34                   | T                 | 0.9725        | 0.9579        | 0.9976        | 0.9979 | 0.9973 | 0.9978 | 0.9729        | 0.9829 | 0.9526 | 0.9867 | 0.9725        | 0.9590 | 0.9852 | 0.9685 | 0.9845        | 0.9946 | 0.9703 | 0.9921 | 0.9725        | 0.9708 | 0.9686 | 0.9775 |
|                            | V                 | 0.9617        | 0.9414        | 0.9959        | 0.9965 | 0.9952 | 0.9962 | 0.9621        | 0.9722 | 0.9416 | 0.9762 | 0.9617        | 0.9452 | 0.9753 | 0.9588 | 0.9786        | 0.9912 | 0.9633 | 0.9858 | 0.9617        | 0.9585 | 0.9582 | 0.9674 |
| ResNet50                   | T                 | 0.9842        | 0.9759        | 0.9993        | 0.9995 | 0.9991 | 0.9994 | 0.9843        | 0.9846 | 0.9810 | 0.9873 | 0.9842        | 0.9833 | 0.9840 | 0.9851 | 0.9915        | 0.9950 | 0.9884 | 0.9923 | 0.9842        | 0.9839 | 0.9825 | 0.9862 |
|                            | V                 | 0.9799        | 0.9693        | 0.9987        | 0.9992 | 0.9982 | 0.9988 | 0.9799        | 0.9810 | 0.9764 | 0.9827 | 0.9799        | 0.9790 | 0.9795 | 0.9808 | 0.9891        | 0.9939 | 0.9856 | 0.9895 | 0.9799        | 0.9800 | 0.9780 | 0.9818 |
| InceptionV3                | T                 | 0.9783        | 0.9670        | 0.9987        | 0.9989 | 0.9982 | 0.9991 | 0.9784        | 0.9722 | 0.9745 | 0.9863 | 0.9784        | 0.9763 | 0.9770 | 0.9811 | 0.9888        | 0.9910 | 0.9845 | 0.9917 | 0.9784        | 0.9743 | 0.9758 | 0.9837 |
|                            | V                 | 0.9645        | 0.9458        | 0.9963        | 0.9969 | 0.9950 | 0.9972 | 0.9645        | 0.9570 | 0.9601 | 0.9739 | 0.9645        | 0.9633 | 0.9603 | 0.9696 | 0.9815        | 0.9860 | 0.9758 | 0.9842 | 0.9645        | 0.9601 | 0.9602 | 0.9717 |
| Xception                   | T                 | 0.9765        | 0.9640        | 0.9986        | 0.9987 | 0.9980 | 0.9990 | 0.9766        | 0.9729 | 0.9656 | 0.9901 | 0.9765        | 0.9725 | 0.9813 | 0.9741 | 0.9876        | 0.9912 | 0.9787 | 0.9941 | 0.9765        | 0.9727 | 0.9734 | 0.9820 |
|                            | V                 | 0.9687        | 0.9522        | 0.9971        | 0.9979 | 0.9961 | 0.9975 | 0.9688        | 0.9656 | 0.9578 | 0.9820 | 0.9687        | 0.9682 | 0.9712 | 0.9665 | 0.9834        | 0.9888 | 0.9740 | 0.9893 | 0.9687        | 0.9670 | 0.9645 | 0.9742 |
| UNI                        | T                 | 0.9843        | 0.9761        | 0.9994        | 0.9996 | 0.9993 | 0.9994 | 0.9845        | 0.9889 | 0.9712 | 0.9950 | 0.9843        | 0.9868 | 0.9945 | 0.9726 | 0.9913        | 0.9964 | 0.9821 | 0.9970 | 0.9843        | 0.9878 | 0.9827 | 0.9837 |
|                            | V                 | 0.9836        | 0.9750        | 0.9994        | 0.9997 | 0.9993 | 0.9994 | 0.9838        | 0.9874 | 0.9717 | 0.9936 | 0.9836        | 0.9858 | 0.9934 | 0.9724 | 0.9909        | 0.9959 | 0.9824 | 0.9962 | 0.9836        | 0.9866 | 0.9824 | 0.9829 |
| CAE-based clustering       | T                 | 0.5021        | 0.2643        | —             | —      | —      | —      | 0.6251        | 0.2348 | 0.5525 | 0.9509 | 0.4893        | 0.5021 | 0.5706 | 0.5044 | 0.7864        | 0.5850 | 0.7194 | 0.9842 | 0.5328        | 0.2939 | 0.5614 | 0.6591 |
|                            | V                 | 0.5096        | 0.2753        | —             | —      | —      | —      | 0.6286        | 0.2425 | 0.5576 | 0.9501 | 0.4973        | 0.5096 | 0.5689 | 0.5183 | 0.7899        | 0.5900 | 0.7261 | 0.9835 | 0.5402        | 0.3033 | 0.5632 | 0.6707 |
| InceptionResNetV2 (fold 9) | T <sub>imi</sub>  | <b>0.9853</b> | <b>0.9776</b> | <b>0.9995</b> | 0.9996 | 0.9994 | 0.9996 | <b>0.9854</b> | 0.9854 | 0.9752 | 0.9950 | <b>0.9853</b> | 0.9851 | 0.9920 | 0.9791 | <b>0.9822</b> | 0.9951 | 0.9856 | 0.9969 | <b>0.9853</b> | 0.9853 | 0.9836 | 0.9870 |
|                            | V <sub>imi</sub>  | <b>0.9787</b> | <b>0.9669</b> | <b>0.9988</b> | 0.9992 | 0.9983 | 0.9991 | <b>0.9788</b> | 0.9671 | 0.9784 | 0.9868 | <b>0.9787</b> | 0.9836 | 0.9788 | 0.9754 | <b>0.9705</b> | 0.9905 | 0.9832 | 0.9933 | <b>0.9787</b> | 0.9753 | 0.9786 | 0.9811 |
|                            | V <sub>isub</sub> | <b>0.9776</b> | <b>0.9616</b> | <b>0.9991</b> | 0.9990 | 0.9983 | 0.9995 | <b>0.9787</b> | 0.9787 | 0.9163 | 0.9971 | <b>0.9777</b> | 0.9766 | 0.9829 | 0.9766 | <b>0.9928</b> | 0.9927 | 0.9816 | 0.9962 | <b>0.9779</b> | 0.9777 | 0.9484 | 0.9868 |
|                            | T <sub>ex1</sub>  | <b>0.9643</b> | <b>0.9348</b> | <b>0.9925</b> | 0.9960 | 0.9921 | 0.9924 | <b>0.9686</b> | 0.7442 | 0.9871 | 0.9772 | <b>0.9643</b> | 0.9877 | 0.9426 | 0.9784 | <b>0.9811</b> | 0.9806 | 0.9916 | 0.9732 | <b>0.9653</b> | 0.8489 | 0.9643 | 0.9778 |
|                            | T <sub>ex2</sub>  | <b>0.9613</b> | <b>0.9325</b> | <b>0.9917</b> | 0.9929 | 0.9925 | 0.9907 | <b>0.9651</b> | 0.7849 | 0.9705 | 0.9883 | <b>0.9613</b> | 0.9777 | 0.9713 | 0.9493 | <b>0.9826</b> | 0.9784 | 0.9757 | 0.9899 | <b>0.9622</b> | 0.8708 | 0.9709 | 0.9684 |
|                            | T <sub>ex3</sub>  | <b>0.9627</b> | <b>0.9319</b> | <b>0.9960</b> | 0.9965 | 0.9954 | 0.9970 | <b>0.9642</b> | 0.8502 | 0.9778 | 0.9739 | <b>0.9627</b> | 0.9553 | 0.9700 | 0.9502 | <b>0.9759</b> | 0.9819 | 0.9683 | 0.9883 | <b>0.9631</b> | 0.8997 | 0.9739 | 0.9623 |

T, training dataset. V, validation dataset. T<sub>imi</sub>, training dataset after iterative manual improvement. V<sub>imi</sub>, validation set after iterative manual improvement. V<sub>isub</sub>, the subset of 5,672 patches in the V<sub>imi</sub> that originated from WSIs different from those in the training set. T<sub>ex1</sub>, RUMC-BRCA set. T<sub>ex2</sub>, CPTAC-LUAD set. T<sub>ex3</sub>, CPTAC-LUSC set. A, weighted average values for every index. P, TIL-positive patches label. N, TIL-negative patches label. O, other(non-tumor/necrotic) patches label. Kappa, Cohen's Kappa Statistic. Accuracy, Kappa, precision, recall, specificity and F1 score values of CAE-based clustering were calculated by comparing prediction classes with true labels.



**Supplementary Table 11. Performance (accuracy) comparison of different models for TIL patch classification**

| Model source       | BLCA          | BRCA          | CESC          | COADREAD      | HNSC          | KIRC          | KIRP          | LUAD          | LUSC          | PRAD          | SARC          | SKCM          | STAD          | THCA          | UCEC          | LIHC          | CAUM          | PAPE          | TTKO          | Average          |
|--------------------|---------------|---------------|---------------|---------------|---------------|---------------|---------------|---------------|---------------|---------------|---------------|---------------|---------------|---------------|---------------|---------------|---------------|---------------|---------------|------------------|
| Le H et al.        |               | 0.8900        | -             | -             | -             | -             | -             | -             | -             | -             | -             | -             | -             | -             | -             | -             | -             | -             | -             | 0.8900           |
| Saltz et al.       |               | 0.7490        | -             | -             | -             | -             | -             | 0.7360        | -             | -             | -             | -             | -             | -             | -             | -             | -             | -             | -             | 0.7956*          |
| Abousamra S et al. | 0.8471        | 0.8716        | 0.7895        | 0.7949/0.6957 | 0.5385        | 0.8254        | -             | 0.8629        | 0.8553        | 0.8358        | 0.9693        | 0.9024        | 0.7500        | -             | 0.8000        | <b>1.0000</b> | -             | -             | -             | 0.8743**         |
| Xu H et al.        | -             | -             | -             | 0,8006        | -             | -             | -             | -             | -             | -             | -             | -             | -             | -             | -             | -             | -             | -             | -             | 0,8006           |
| <b>TILscout</b>    | <b>0.9762</b> | <b>0.9688</b> | <b>0.9710</b> | <b>0.9823</b> | <b>0.9735</b> | <b>0.9853</b> | <b>0.9831</b> | <b>0.9868</b> | <b>0.9867</b> | <b>0.9674</b> | <b>0.9944</b> | <b>0.9920</b> | <b>0.9819</b> | <b>0.9889</b> | <b>0.9859</b> | 0.9566        | <b>0.9720</b> | <b>0.9923</b> | <b>0.9710</b> | <b>0.9787***</b> |

CAUM, consisting of CHOL, ACC, UCS, and MESO. PAPE, consisting of PAAD, PCPG, and ESCA. TTKO, consisting of TGCT, THYM, KICH, and OV.

\*, average accuracy value in 13 cancer types (BLCA, BRCA, CESC, COAD, LUAD, LUSC, PAAD, PRAD, READ, SKCM, STAD, UCEC, UVM).

\*\* , average accuracy value in 23 cancer types (ACC, BLCA, BRCA, CESC, COAD, ESCA, HNSC, KIRC, LIHC, LUAD, LUSC, MESO, OV, PAAD, PRAD, READ, SKCM, SARC, STAD, TGCT, THYM, UCEC, UVM).

\*\*\*, average accuracy value in 28 cancer types.

Supplementary Table 12. Comparison of different methods

| Model resource     | Pan-cancer applicable | Manual annotation/<br>analysis during prediction | Multiple separate methods | Accuracy      |
|--------------------|-----------------------|--------------------------------------------------|---------------------------|---------------|
| Le H et al.        | -                     | +                                                | +                         | 0.8900        |
| Saltz et al.       | ±*                    | +                                                | +                         | 0.7956        |
| Abousamra S et al. | ±*                    | +                                                | +                         | 0.8743        |
| Xu H et al.        | -                     | +                                                | +                         | 0,8006        |
| <b>TILScout</b>    | <b>+</b>              | <b>-</b>                                         | <b>-</b>                  | <b>0.9787</b> |

\*, fewer cancer types were involved.
