# Supplementary material for: Prediction and analysis of tumor infiltrating lymphocytes across 28 cancers by TILScout using deep learning
Source: Springer Nature journal article supplement (doi:10.1038/s41698-025-00866-0), 2025-03-19
Supplement: MOESM3 [file 41698_2025_866_MOESM3_ESM.pdf]

| N  | Description                                                                                                                       | setSize | enrichmentScore   | NES              | pvalue    | p.adjust  | qvalue    | rank |
|----|-----------------------------------------------------------------------------------------------------------------------------------|---------|-------------------|------------------|-----------|-----------|-----------|------|
| 1  | GO(BP): immune response                                                                                                           | 460     | 0.601399003345435 | 3.16679095695844 | 0.0009990 | 0.0265670 | 0.0238309 | 616  |
| 2  | GO(BP): adaptive immune response                                                                                                  | 196     | 0.617490741224126 | 3.15165522761317 | 0.0009990 | 0.0265670 | 0.0238309 | 597  |
| 3  | GO(BP): T cell activation                                                                                                         | 204     | 0.613084386998104 | 3.13716095354642 | 0.0009990 | 0.0265670 | 0.0238309 | 419  |
| 4  | GO(BP): antigen receptor-mediated signaling pathway                                                                               | 82      | 0.660725561388195 | 3.12087334931358 | 0.0010070 | 0.0265670 | 0.0238309 | 596  |
| 5  | GO(BP): lymphocyte mediated immunity                                                                                              | 122     | 0.615172216414324 | 3.04258596840579 | 0.0009990 | 0.0265670 | 0.0238309 | 527  |
| 6  | GO(BP): regulation of T cell activation                                                                                           | 147     | 0.604350276097278 | 3.03734146749573 | 0.0009990 | 0.0265670 | 0.0238309 | 419  |
| 7  | GO(BP): lymphocyte activation                                                                                                     | 274     | 0.58080502489054  | 3.01084759655203 | 0.0009990 | 0.0265670 | 0.0238309 | 429  |
| 8  | GO(BP): leukocyte mediated immunity                                                                                               | 152     | 0.597024699332743 | 3.00651283516784 | 0.0009990 | 0.0265670 | 0.0238309 | 527  |
| 9  | GO(BP): regulation of immune system process                                                                                       | 389     | 0.574250847824994 | 3.00477263725739 | 0.0009990 | 0.0265670 | 0.0238309 | 657  |
| 10 | GO(BP): regulation of immune response                                                                                             | 264     | 0.579917858793748 | 3.0011810629988  | 0.0009990 | 0.0265670 | 0.0238309 | 616  |
| 11 | GO(BP): regulation of leukocyte cell-cell adhesion                                                                                | 138     | 0.599115876847611 | 2.99810110141967 | 0.0009990 | 0.0265670 | 0.0238309 | 419  |
| 12 | GO(BP): T cell receptor signaling pathway                                                                                         | 57      | 0.663031077921209 | 2.99177265205095 | 0.0010162 | 0.0265670 | 0.0238309 | 454  |
| 13 | GO(BP): leukocyte cell-cell adhesion                                                                                              | 151     | 0.592716073128298 | 2.98387562868408 | 0.0009990 | 0.0265670 | 0.0238309 | 419  |
| 14 | GO(BP): regulation of lymphocyte activation                                                                                       | 189     | 0.58560139210833  | 2.98032302891117 | 0.0009990 | 0.0265670 | 0.0238309 | 423  |
| 15 | GO(BP): positive regulation of immune system process                                                                              | 304     | 0.569195582431659 | 2.95458072527932 | 0.0009990 | 0.0265670 | 0.0238309 | 605  |
| 16 | GO(BP): positive regulation of immune response                                                                                    | 222     | 0.574610177685273 | 2.95247697482164 | 0.0009990 | 0.0265670 | 0.0238309 | 598  |
| 17 | GO(BP): immune effector process                                                                                                   | 200     | 0.576437985164438 | 2.94575010599302 | 0.0009990 | 0.0265670 | 0.0238309 | 527  |
| 18 | GO(BP): positive regulation of leukocyte mediated cytotoxicity                                                                    | 37      | 0.699854168668476 | 2.93293416925359 | 0.0010570 | 0.0265670 | 0.0238309 | 492  |
| 19 | GO(BP): regulation of leukocyte activation                                                                                        | 205     | 0.572564045201313 | 2.93129191905624 | 0.0009990 | 0.0265670 | 0.0238309 | 423  |
| 20 | GO(BP): positive regulation of cell killing                                                                                       | 42      | 0.682581557752735 | 2.92826410613538 | 0.0010449 | 0.0265670 | 0.0238309 | 492  |
| 21 | GO(BP): leukocyte mediated cytotoxicity                                                                                           | 66      | 0.632022910541014 | 2.90718609043997 | 0.0010060 | 0.0265670 | 0.0238309 | 499  |
| 22 | GO(BP): leukocyte activation                                                                                                      | 307     | 0.559023753206442 | 2.90200675416898 | 0.0009990 | 0.0265670 | 0.0238309 | 615  |
| 23 | GO(BP): regulation of cell-cell adhesion                                                                                          | 153     | 0.57377992089251  | 2.89182537643099 | 0.0009990 | 0.0265670 | 0.0238309 | 419  |
| 24 | GO(BP): regulation of leukocyte mediated cytotoxicity                                                                             | 51      | 0.650595539350162 | 2.88763957231421 | 0.0010277 | 0.0265670 | 0.0238309 | 499  |
| 25 | GO(BP): T cell differentiation                                                                                                    | 113     | 0.587028698197381 | 2.8782392527501  | 0.0010010 | 0.0265670 | 0.0238309 | 403  |
| 26 | GO(BP): T cell selection                                                                                                          | 28      | 0.733826241254768 | 2.87321832648074 | 0.0010905 | 0.0265670 | 0.0238309 | 399  |
| 27 | GO(BP): cell activation                                                                                                           | 327     | 0.552130209646687 | 2.86827053964997 | 0.0009990 | 0.0265670 | 0.0238309 | 615  |
| 28 | GO(BP): immune response-regulating cell surface receptor signaling pathway                                                        | 126     | 0.576701043710831 | 2.86733501286155 | 0.0009990 | 0.0265670 | 0.0238309 | 605  |
| 29 | GO(BP): T cell mediated immunity                                                                                                  | 49      | 0.64641725906223  | 2.85554368919373 | 0.0010288 | 0.0265670 | 0.0238309 | 487  |
| 30 | GO(BP): regulation of cell activation                                                                                             | 214     | 0.555586382710963 | 2.85126490633594 | 0.0009990 | 0.0265670 | 0.0238309 | 423  |
| 31 | GO(BP): adaptive immune response based on somatic recombination of immune receptors built from immunoglobulin superfamily domains | 119     | 0.578182265023598 | 2.84866358238265 | 0.0009990 | 0.0265670 | 0.0238309 | 521  |
| 32 | GO(BP): positive regulation of leukocyte cell-cell adhesion                                                                       | 116     | 0.578534950013805 | 2.84685820528248 | 0.0009990 | 0.0265670 | 0.0238309 | 573  |
| 33 | GO(BP): T cell mediated cytotoxicity                                                                                              | 25      | 0.746529138337817 | 2.84642456939333 | 0.0011111 | 0.0265670 | 0.0238309 | 458  |
| 34 | GO(BP): positive regulation of lymphocyte mediated immunity                                                                       | 54      | 0.634592719650414 | 2.83899388890963 | 0.0010256 | 0.0265670 | 0.0238309 | 458  |
| 35 | GO(BP): positive regulation of leukocyte mediated immunity                                                                        | 60      | 0.623320241189456 | 2.83642836769022 | 0.0010152 | 0.0265670 | 0.0238309 | 492  |
| 36 | GO(BP): positive regulation of T cell activation                                                                                  | 109     | 0.580835944001646 | 2.83608464401897 | 0.001     | 0.0265670 | 0.0238309 | 419  |
| 37 | GO(BP): immune response-activating cell surface receptor signaling pathway                                                        | 115     | 0.576655776355954 | 2.83420807865669 | 0.001     | 0.0265670 | 0.0238309 | 605  |

|    |                                                                   |     |                   |                  |           |           |           |     |
|----|-------------------------------------------------------------------|-----|-------------------|------------------|-----------|-----------|-----------|-----|
| 38 | GO(BP): regulation of leukocyte mediated immunity                 | 97  | 0.587316731701653 | 2.83112575555302 | 0.0009990 | 0.0265670 | 0.0238309 | 499 |
| 39 | GO(BP): regulation of cell killing                                | 58  | 0.623884057821557 | 2.82484287384936 | 0.0010162 | 0.0265670 | 0.0238309 | 499 |
| 40 | GO(BP): positive regulation of leukocyte activation               | 139 | 0.563091031458387 | 2.82247736523318 | 0.0009990 | 0.0265670 | 0.0238309 | 419 |
| 41 | GO(BP): regulation of lymphocyte mediated immunity                | 78  | 0.600076129323339 | 2.82188986962686 | 0.0010080 | 0.0265670 | 0.0238309 | 499 |
| 42 | GO(BP): lymphocyte differentiation                                | 148 | 0.559759454229382 | 2.81610897061983 | 0.0009990 | 0.0265670 | 0.0238309 | 597 |
| 43 | GO(BP): positive T cell selection                                 | 19  | 0.788036503668883 | 2.81609397813777 | 0.0011402 | 0.0265670 | 0.0238309 | 399 |
| 44 | GO(BP): alpha-beta T cell activation                              | 83  | 0.594227434628097 | 2.81329141286258 | 0.0010050 | 0.0265670 | 0.0238309 | 573 |
| 45 | GO(BP): positive regulation of cell-cell adhesion                 | 118 | 0.570849943078051 | 2.80934475365564 | 0.0009990 | 0.0265670 | 0.0238309 | 573 |
| 46 | GO(BP): regulation of immune effector process                     | 123 | 0.564380150905333 | 2.79392557070925 | 0.0009990 | 0.0265670 | 0.0238309 | 499 |
| 47 | GO(BP): positive regulation of cell activation                    | 143 | 0.555704465587198 | 2.7917063629052  | 0.0009990 | 0.0265670 | 0.0238309 | 419 |
| 48 | GO(BP): positive regulation of lymphocyte activation              | 133 | 0.559009730330044 | 2.78542399297504 | 0.001     | 0.0265670 | 0.0238309 | 419 |
| 49 | GO(BP): regulation of T cell mediated cytotoxicity                | 23  | 0.742196610706985 | 2.78530467765476 | 0.0011210 | 0.0265670 | 0.0238309 | 458 |
| 50 | GO(BP): regulation of lymphocyte differentiation                  | 82  | 0.588932392575403 | 2.7817652531475  | 0.0010070 | 0.0265670 | 0.0238309 | 419 |
| 51 | GO(BP): regulation of T cell mediated immunity                    | 40  | 0.656370545314624 | 2.77543141712022 | 0.0010537 | 0.0265670 | 0.0238309 | 487 |
| 52 | GO(BP): cell killing                                              | 75  | 0.591752987214727 | 2.76932623156122 | 0.0010080 | 0.0265670 | 0.0238309 | 499 |
| 53 | GO(BP): mononuclear cell differentiation                          | 158 | 0.546306137126668 | 2.76528874702014 | 0.0009990 | 0.0265670 | 0.0238309 | 598 |
| 54 | GO(BP): mononuclear cell proliferation                            | 123 | 0.556165246562293 | 2.7532582452051  | 0.0009990 | 0.0265670 | 0.0238309 | 573 |
| 55 | GO(BP): lymphocyte proliferation                                  | 123 | 0.556165246562293 | 2.7532582452051  | 0.0009990 | 0.0265670 | 0.0238309 | 573 |
| 56 | GO(BP): T cell differentiation in thymus                          | 32  | 0.676409769163931 | 2.73420698285682 | 0.0010706 | 0.0265670 | 0.0238309 | 403 |
| 57 | GO(BP): cell-cell adhesion                                        | 193 | 0.534742722811605 | 2.72596347525559 | 0.0009990 | 0.0265670 | 0.0238309 | 419 |
| 58 | GO(BP): negative regulation of immune system process              | 137 | 0.545514769034899 | 2.72590844009256 | 0.0009990 | 0.0265670 | 0.0238309 | 624 |
| 59 | GO(BP): positive regulation of immune effector process            | 93  | 0.568580268387725 | 2.72444212030567 | 0.001     | 0.0265670 | 0.0238309 | 615 |
| 60 | GO(BP): regulation of mononuclear cell proliferation              | 101 | 0.561454188141635 | 2.71419374042617 | 0.0009990 | 0.0265670 | 0.0238309 | 403 |
| 61 | GO(BP): regulation of lymphocyte proliferation                    | 101 | 0.561454188141635 | 2.71419374042617 | 0.0009990 | 0.0265670 | 0.0238309 | 403 |
| 62 | GO(BP): leukocyte proliferation                                   | 130 | 0.542657561712696 | 2.70742196142399 | 0.0009990 | 0.0265670 | 0.0238309 | 601 |
| 63 | GO(BP): activation of immune response                             | 159 | 0.534562000342641 | 2.70589061200418 | 0.0009990 | 0.0265670 | 0.0238309 | 605 |
| 64 | GO(BP): antigen processing and presentation of exogenous antigen  | 30  | 0.679023074534483 | 2.70184725534794 | 0.0010799 | 0.0265670 | 0.0238309 | 498 |
| 65 | GO(BP): regulation of leukocyte proliferation                     | 106 | 0.554202518967253 | 2.69290627327903 | 0.001     | 0.0265670 | 0.0238309 | 640 |
| 66 | GO(BP): immune response-activating signaling pathway              | 150 | 0.534572422855955 | 2.69013077099376 | 0.0009990 | 0.0265670 | 0.0238309 | 624 |
| 67 | GO(BP): regulation of cell adhesion                               | 187 | 0.52876249472349  | 2.68949367506265 | 0.0009990 | 0.0265670 | 0.0238309 | 419 |
| 68 | GO(BP): innate immune response                                    | 223 | 0.522761167365598 | 2.68504829487575 | 0.0009990 | 0.0265670 | 0.0238309 | 636 |
| 69 | GO(BP): T cell proliferation                                      | 88  | 0.563443349095282 | 2.68440821584658 | 0.0010020 | 0.0265670 | 0.0238309 | 456 |
| 70 | GO(BP): regulation of antigen receptor-mediated signaling pathway | 31  | 0.668883200153793 | 2.68322524399288 | 0.0010729 | 0.0265670 | 0.0238309 | 557 |
| 71 | GO(BP): immune response-regulating signaling pathway              | 159 | 0.529325032616835 | 2.67938169106415 | 0.0009990 | 0.0265670 | 0.0238309 | 605 |
| 72 | GO(BP): B cell receptor signaling pathway                         | 34  | 0.654464839420787 | 2.67612699846306 | 0.0010649 | 0.0265670 | 0.0238309 | 566 |
| 73 | GO(BP): regulation of T cell proliferation                        | 76  | 0.571299343627841 | 2.6725111417666  | 0.0010101 | 0.0265670 | 0.0238309 | 573 |
| 74 | GO(BP): positive regulation of T cell mediated cytotoxicity       | 18  | 0.754226436910468 | 2.66589428965698 | 0.0011454 | 0.0265670 | 0.0238309 | 458 |
| 75 | GO(BP): natural killer cell mediated immunity                     | 43  | 0.617772276147314 | 2.65185178179612 | 0.0010471 | 0.0265670 | 0.0238309 | 635 |
| 76 | GO(BP): antigen processing and presentation                       | 52  | 0.593961961628682 | 2.64891018998854 | 0.0010245 | 0.0265670 | 0.0238309 | 596 |

|     |                                                                                                                                                          |     |                   |                  |           |           |           |     |
|-----|----------------------------------------------------------------------------------------------------------------------------------------------------------|-----|-------------------|------------------|-----------|-----------|-----------|-----|
| 77  | GO(BP): positive regulation of cell adhesion                                                                                                             | 136 | 0.529658724493681 | 2.64653157352968 | 0.0009990 | 0.0265670 | 0.0238309 | 573 |
| 78  | GO(BP): natural killer cell mediated cytotoxicity                                                                                                        | 42  | 0.614370059986467 | 2.63563785764383 | 0.0010449 | 0.0265670 | 0.0238309 | 635 |
| 79  | GO(BP): production of molecular mediator of immune response                                                                                              | 68  | 0.571746172401401 | 2.63441552048951 | 0.0010080 | 0.0265670 | 0.0238309 | 487 |
| 80  | GO(BP): response to external biotic stimulus                                                                                                             | 325 | 0.505336371655818 | 2.62500905345089 | 0.0009990 | 0.0265670 | 0.0238309 | 616 |
| 81  | GO(BP): response to other organism                                                                                                                       | 325 | 0.505336371655818 | 2.62500905345089 | 0.0009990 | 0.0265670 | 0.0238309 | 616 |
| 82  | GO(BP): positive regulation of alpha-beta T cell activation                                                                                              | 38  | 0.621817815782804 | 2.61922340416587 | 0.0010559 | 0.0265670 | 0.0238309 | 561 |
| 83  | GO(BP): regulation of T cell differentiation                                                                                                             | 71  | 0.563892137501638 | 2.61841661830465 | 0.0010060 | 0.0265670 | 0.0238309 | 419 |
| 84  | GO(BP): regulation of cytokine production                                                                                                                | 201 | 0.510724544435275 | 2.61074245814739 | 0.0009990 | 0.0265670 | 0.0238309 | 600 |
| 85  | GO(BP): defense response to other organism                                                                                                               | 268 | 0.503550917336918 | 2.61002374226508 | 0.0009990 | 0.0265670 | 0.0238309 | 616 |
| 86  | GO(BP): cytokine production                                                                                                                              | 205 | 0.507294748970294 | 2.59714002424558 | 0.0009990 | 0.0265670 | 0.0238309 | 626 |
| 87  | GO(BP): positive regulation of cytokine production                                                                                                       | 146 | 0.516340635293182 | 2.59486047052104 | 0.0009990 | 0.0265670 | 0.0238309 | 598 |
| 88  | GO(BP): cell activation involved in immune response                                                                                                      | 99  | 0.536140475803929 | 2.59045393645587 | 0.0009990 | 0.0265670 | 0.0238309 | 635 |
| 89  | GO(BP): leukocyte activation involved in immune response                                                                                                 | 99  | 0.536140475803929 | 2.59045393645587 | 0.0009990 | 0.0265670 | 0.0238309 | 635 |
| 90  | GO(BP): leukocyte differentiation                                                                                                                        | 184 | 0.509405246253015 | 2.5904537835036  | 0.0009990 | 0.0265670 | 0.0238309 | 598 |
| 91  | GO(BP): alpha-beta T cell differentiation                                                                                                                | 50  | 0.583963296272317 | 2.58779615037035 | 0.0010288 | 0.0265670 | 0.0238309 | 419 |
| 92  | GO(BP): response to biotic stimulus                                                                                                                      | 334 | 0.497787429525677 | 2.5868521759924  | 0.0009990 | 0.0265670 | 0.0238309 | 616 |
| 93  | GO(BP): defense response                                                                                                                                 | 386 | 0.494368474048317 | 2.58557485271815 | 0.0009990 | 0.0265670 | 0.0238309 | 823 |
| 94  | GO(BP): regulation of leukocyte differentiation                                                                                                          | 101 | 0.534398952616352 | 2.58340274721702 | 0.0009990 | 0.0265670 | 0.0238309 | 419 |
| 95  | GO(BP): antigen processing and presentation of endogenous antigen                                                                                        | 20  | 0.705257568215174 | 2.57174827925253 | 0.0011235 | 0.0265670 | 0.0238309 | 558 |
| 96  | GO(BP): positive regulation of T cell mediated immunity                                                                                                  | 28  | 0.654444878656058 | 2.56240907358508 | 0.0010905 | 0.0265670 | 0.0238309 | 487 |
| 97  | GO(BP): negative regulation of leukocyte activation                                                                                                      | 74  | 0.547433816012203 | 2.56017758008023 | 0.0010070 | 0.0265670 | 0.0238309 | 800 |
| 98  | GO(BP): negative regulation of leukocyte mediated immunity                                                                                               | 31  | 0.636865343828478 | 2.55478559962617 | 0.0010729 | 0.0265670 | 0.0238309 | 402 |
| 99  | GO(BP): positive regulation of adaptive immune response based on somatic recombination of immune receptors built from immunoglobulin superfamily domains | 49  | 0.577929585493801 | 2.55299987356355 | 0.0010288 | 0.0265670 | 0.0238309 | 487 |
| 100 | GO(BP): regulation of adaptive immune response based on somatic recombination of immune receptors built from immunoglobulin superfamily domains          | 71  | 0.548974249871339 | 2.54914584419129 | 0.0010060 | 0.0265670 | 0.0238309 | 458 |
| 101 | GO(BP): positive regulation of T cell proliferation                                                                                                      | 54  | 0.569186351834799 | 2.54638372687279 | 0.0010256 | 0.0265670 | 0.0238309 | 456 |
| 102 | GO(BP): negative regulation of lymphocyte activation                                                                                                     | 62  | 0.555113140120505 | 2.53629937843032 | 0.0010111 | 0.0265670 | 0.0238309 | 729 |
| 103 | GO(BP): immunoglobulin production                                                                                                                        | 42  | 0.591146175721802 | 2.536007760808   | 0.0010449 | 0.0265670 | 0.0238309 | 487 |
| 104 | GO(BP): regulation of hemopoiesis                                                                                                                        | 115 | 0.515809072331127 | 2.53515233833866 | 0.001     | 0.0265670 | 0.0238309 | 571 |
| 105 | GO(BP): positive regulation of natural killer cell mediated immunity                                                                                     | 20  | 0.693854912142218 | 2.53016806451092 | 0.0011235 | 0.0265670 | 0.0238309 | 349 |
| 106 | GO(BP): antigen processing and presentation of peptide antigen                                                                                           | 33  | 0.625347228734394 | 2.5298098459691  | 0.0010706 | 0.0265670 | 0.0238309 | 588 |
| 107 | GO(BP): regulation of adaptive immune response                                                                                                           | 78  | 0.536640139209658 | 2.52357875687954 | 0.0010080 | 0.0265670 | 0.0238309 | 458 |
| 108 | GO(BP): interleukin-12 production                                                                                                                        | 29  | 0.638262337133558 | 2.51788724173886 | 0.0010869 | 0.0265670 | 0.0238309 | 395 |
| 109 | GO(BP): regulation of interleukin-12 production                                                                                                          | 29  | 0.638262337133558 | 2.51788724173886 | 0.0010869 | 0.0265670 | 0.0238309 | 395 |
| 110 | GO(BP): positive regulation of adaptive immune response                                                                                                  | 50  | 0.567552711625523 | 2.51507368982293 | 0.0010288 | 0.0265670 | 0.0238309 | 487 |
| 111 | GO(BP): positive regulation of mononuclear cell proliferation                                                                                            | 69  | 0.542687673523641 | 2.50783350115689 | 0.0010080 | 0.0265670 | 0.0238309 | 399 |

|     |                                                                                   |     |                   |                  |           |           |           |     |
|-----|-----------------------------------------------------------------------------------|-----|-------------------|------------------|-----------|-----------|-----------|-----|
| 112 | GO(BP): positive regulation of lymphocyte proliferation                           | 69  | 0.542687673523641 | 2.50783350115689 | 0.0010080 | 0.0265670 | 0.0238309 | 399 |
| 113 | GO(BP): regulation of natural killer cell mediated immunity                       | 32  | 0.620132594277068 | 2.50672143849321 | 0.0010706 | 0.0265670 | 0.0238309 | 499 |
| 114 | GO(BP): negative regulation of immune response                                    | 63  | 0.54659561754745  | 2.50256489098287 | 0.0010111 | 0.0265670 | 0.0238309 | 624 |
| 115 | GO(BP): gamma-delta T cell activation                                             | 15  | 0.750134874269957 | 2.49971536980764 | 0.0011820 | 0.0265670 | 0.0238309 | 351 |
| 116 | GO(BP): biological process involved in interspecies interaction between organisms | 349 | 0.479479661302008 | 2.49624436407482 | 0.0009990 | 0.0265670 | 0.0238309 | 616 |
| 117 | GO(BP): negative regulation of cell activation                                    | 77  | 0.532617361383948 | 2.49605587861272 | 0.0010101 | 0.0265670 | 0.0238309 | 800 |
| 118 | GO(BP): regulation of alpha-beta T cell activation                                | 57  | 0.552038270784706 | 2.49094357175131 | 0.0010162 | 0.0265670 | 0.0238309 | 573 |
| 119 | GO(BP): positive regulation of lymphocyte differentiation                         | 52  | 0.557604694856503 | 2.48676658373996 | 0.0010245 | 0.0265670 | 0.0238309 | 561 |
| 120 | GO(BP): positive regulation of leukocyte proliferation                            | 73  | 0.531409426269503 | 2.47938040937    | 0.0010070 | 0.0265670 | 0.0238309 | 657 |
| 121 | GO(BP): regulation of production of molecular mediator of immune response         | 51  | 0.557253249341419 | 2.47334393993268 | 0.0010277 | 0.0265670 | 0.0238309 | 402 |
| 122 | GO(BP): B cell mediated immunity                                                  | 52  | 0.553779237435904 | 2.46970607515957 | 0.0010245 | 0.0265670 | 0.0238309 | 820 |
| 123 | GO(BP): hemopoiesis                                                               | 227 | 0.480353300724422 | 2.46969660115887 | 0.0009990 | 0.0265670 | 0.0238309 | 598 |
| 124 | GO(BP): regulation of natural killer cell mediated cytotoxicity                   | 31  | 0.615179437443166 | 2.46779257687039 | 0.0010729 | 0.0265670 | 0.0238309 | 624 |
| 125 | GO(BP): antigen processing and presentation of exogenous peptide antigen          | 24  | 0.650798683714741 | 2.4650105938106  | 0.0011111 | 0.0265670 | 0.0238309 | 498 |
| 126 | GO(BP): regulation of T cell receptor signaling pathway                           | 22  | 0.667699607781003 | 2.46079553219113 | 0.0011337 | 0.0265670 | 0.0238309 | 596 |
| 127 | GO(BP): leukocyte migration                                                       | 95  | 0.512673113582929 | 2.45671840721017 | 0.001     | 0.0265670 | 0.0238309 | 612 |
| 128 | GO(BP): positive regulation of natural killer cell mediated cytotoxicity          | 19  | 0.686944716759242 | 2.45483663659329 | 0.0011402 | 0.0265670 | 0.0238309 | 349 |
| 129 | GO(BP): negative regulation of immune effector process                            | 38  | 0.582693498943309 | 2.45442380573525 | 0.0010559 | 0.0265670 | 0.0238309 | 402 |
| 130 | GO(BP): positive regulation of leukocyte differentiation                          | 61  | 0.536301825775932 | 2.44859270962601 | 0.0010131 | 0.0265670 | 0.0238309 | 561 |
| 131 | GO(BP): positive regulation of hemopoiesis                                        | 61  | 0.536301825775932 | 2.44859270962601 | 0.0010131 | 0.0265670 | 0.0238309 | 561 |
| 132 | GO(BP): immunoglobulin mediated immune response                                   | 51  | 0.551155137260028 | 2.44627773874074 | 0.0010277 | 0.0265670 | 0.0238309 | 820 |
| 133 | GO(BP): positive regulation of response to stimulus                               | 397 | 0.465356730455316 | 2.4333957299156  | 0.0009990 | 0.0265670 | 0.0238309 | 616 |
| 134 | GO(BP): cell adhesion mediated by integrin                                        | 18  | 0.687898487666749 | 2.43145103431604 | 0.0011454 | 0.0265670 | 0.0238309 | 408 |
| 135 | GO(BP): cytokine production involved in immune response                           | 34  | 0.591571745273698 | 2.418955188572   | 0.0010649 | 0.0265670 | 0.0238309 | 487 |
| 136 | GO(BP): regulation of cytokine production involved in immune response             | 34  | 0.591571745273698 | 2.418955188572   | 0.0010649 | 0.0265670 | 0.0238309 | 487 |
| 137 | GO(BP): regulation of leukocyte apoptotic process                                 | 32  | 0.597983071133445 | 2.41718786933572 | 0.0010706 | 0.0265670 | 0.0238309 | 596 |
| 138 | GO(BP): regulation of T cell apoptotic process                                    | 19  | 0.674382655194876 | 2.40994538376464 | 0.0011402 | 0.0265670 | 0.0238309 | 571 |
| 139 | GO(BP): regulation of innate immune response                                      | 114 | 0.488829002061919 | 2.40321480120615 | 0.001     | 0.0265670 | 0.0238309 | 624 |
| 140 | GO(BP): positive regulation of multicellular organismal process                   | 291 | 0.46220324678978  | 2.39736084102356 | 0.0009990 | 0.0265670 | 0.0238309 | 625 |
| 141 | GO(BP): type II interferon production                                             | 53  | 0.536523470610505 | 2.39701416108034 | 0.0010235 | 0.0265670 | 0.0238309 | 624 |
| 142 | GO(BP): regulation of type II interferon production                               | 53  | 0.536523470610505 | 2.39701416108034 | 0.0010235 | 0.0265670 | 0.0238309 | 624 |
| 143 | GO(BP): negative regulation of T cell activation                                  | 49  | 0.541442444717092 | 2.3918181861612  | 0.0010288 | 0.0265670 | 0.0238309 | 792 |
| 144 | GO(BP): cell adhesion                                                             | 270 | 0.459246826159779 | 2.3826325570776  | 0.0009990 | 0.0265670 | 0.0238309 | 419 |
| 145 | GO(BP): thymic T cell selection                                                   | 15  | 0.714762322142223 | 2.38184148438261 | 0.0011820 | 0.0265670 | 0.0238309 | 341 |
| 146 | GO(BP): antigen processing and presentation via MHC class Ib                      | 13  | 0.741565411867153 | 2.37863448638053 | 0.0012210 | 0.0265670 | 0.0238309 | 458 |
| 147 | GO(BP): positive regulation of CD4-positive, alpha-beta T cell activation         | 24  | 0.627393349279793 | 2.37635891276461 | 0.0011111 | 0.0265670 | 0.0238309 | 561 |
| 148 | GO(BP): lymphocyte migration                                                      | 43  | 0.553418694390695 | 2.37560733536266 | 0.0010471 | 0.0265670 | 0.0238309 | 345 |
| 149 | GO(BP): lymphocyte activation involved in immune response                         | 72  | 0.510323364012366 | 2.37456134829645 | 0.0010060 | 0.0265670 | 0.0238309 | 635 |

|     |                                                                                                   |     |                   |                  |           |           |           |     |
|-----|---------------------------------------------------------------------------------------------------|-----|-------------------|------------------|-----------|-----------|-----------|-----|
| 150 | GO(BP): B cell activation                                                                         | 95  | 0.494548484566235 | 2.36986557925908 | 0.001     | 0.0265670 | 0.0238309 | 612 |
| 151 | GO(BP): negative regulation of leukocyte cell-cell adhesion                                       | 51  | 0.533327012845109 | 2.36714839578201 | 0.0010277 | 0.0265670 | 0.0238309 | 792 |
| 152 | GO(BP): negative regulation of antigen receptor-mediated signaling pathway                        | 16  | 0.699134119310034 | 2.365865261481   | 0.0011792 | 0.0265670 | 0.0238309 | 548 |
| 153 | GO(BP): regulation of leukocyte migration                                                         | 57  | 0.523859915497136 | 2.36379533460768 | 0.0010162 | 0.0265670 | 0.0238309 | 612 |
| 154 | GO(BP): regulation of B cell activation                                                           | 55  | 0.525139971619522 | 2.3609198560383  | 0.0010214 | 0.0265670 | 0.0238309 | 423 |
| 155 | GO(BP): negative regulation of T cell mediated immunity                                           | 13  | 0.735819555300455 | 2.36020415998636 | 0.0012210 | 0.0265670 | 0.0238309 | 402 |
| 156 | GO(BP): regulation of lymphocyte apoptotic process                                                | 25  | 0.618346404202836 | 2.35767943531027 | 0.0011111 | 0.0265670 | 0.0238309 | 571 |
| 157 | GO(BP): CD4-positive, alpha-beta T cell activation                                                | 49  | 0.531872353154541 | 2.34954237408574 | 0.0010288 | 0.0265670 | 0.0238309 | 597 |
| 158 | GO(BP): positive regulation of type II interferon production                                      | 40  | 0.554943708729884 | 2.34655289597715 | 0.0010537 | 0.0265670 | 0.0238309 | 803 |
| 159 | GO(BP): mononuclear cell migration                                                                | 57  | 0.520008224518439 | 2.34641548000064 | 0.0010162 | 0.0265670 | 0.0238309 | 345 |
| 160 | GO(BP): positive regulation of T cell differentiation                                             | 45  | 0.539914893316274 | 2.34470127889702 | 0.0010373 | 0.0265670 | 0.0238309 | 561 |
| 161 | GO(BP): response to external stimulus                                                             | 462 | 0.444373215535989 | 2.34048986870693 | 0.0009990 | 0.0265670 | 0.0238309 | 619 |
| 162 | GO(BP): negative regulation of leukocyte apoptotic process                                        | 25  | 0.613429623627395 | 2.33893235055024 | 0.0011111 | 0.0265670 | 0.0238309 | 319 |
| 163 | GO(BP): regulation of defense response                                                            | 191 | 0.4580946066582   | 2.33312296192324 | 0.0009990 | 0.0265670 | 0.0238309 | 800 |
| 164 | GO(BP): positive regulation of response to external stimulus                                      | 146 | 0.463279736055199 | 2.32820388656893 | 0.0009990 | 0.0265670 | 0.0238309 | 900 |
| 165 | GO(BP): negative regulation of leukocyte proliferation                                            | 38  | 0.552473636868053 | 2.32713158603818 | 0.0010559 | 0.0265670 | 0.0238309 | 729 |
| 166 | GO(BP): negative regulation of lymphocyte mediated immunity                                       | 26  | 0.604960894475035 | 2.32581694620484 | 0.0011025 | 0.0265670 | 0.0238309 | 454 |
| 167 | GO(BP): regulation of response to biotic stimulus                                                 | 138 | 0.463885512640531 | 2.32138008710117 | 0.0009990 | 0.0265670 | 0.0238309 | 799 |
| 168 | GO(BP): response to bacterium                                                                     | 129 | 0.465163654338481 | 2.31530671679072 | 0.001     | 0.0265670 | 0.0238309 | 717 |
| 169 | GO(BP): myeloid cell activation involved in immune response                                       | 34  | 0.566029979046325 | 2.31451411538922 | 0.0010649 | 0.0265670 | 0.0238309 | 624 |
| 170 | GO(BP): positive regulation of alpha-beta T cell differentiation                                  | 23  | 0.616251154032775 | 2.312658394253   | 0.0011210 | 0.0265670 | 0.0238309 | 561 |
| 171 | GO(BP): response to type II interferon                                                            | 46  | 0.531351072458799 | 2.30758505268742 | 0.0010351 | 0.0265670 | 0.0238309 | 692 |
| 172 | GO(BP): immunoglobulin production involved in immunoglobulin-mediated immune response             | 29  | 0.584844318825766 | 2.3071579867742  | 0.0010869 | 0.0265670 | 0.0238309 | 417 |
| 173 | GO(BP): cellular response to type II interferon                                                   | 39  | 0.542273874712494 | 2.29927446692462 | 0.0010471 | 0.0265670 | 0.0238309 | 805 |
| 174 | GO(BP): positive regulation of production of molecular mediator of immune response                | 40  | 0.543626125180225 | 2.2986970359392  | 0.0010537 | 0.0265670 | 0.0238309 | 363 |
| 175 | GO(BP): B cell differentiation                                                                    | 50  | 0.516752840764856 | 2.28995729793374 | 0.0010288 | 0.0265670 | 0.0238309 | 612 |
| 176 | GO(BP): antigen processing and presentation of peptide antigen via MHC class II                   | 18  | 0.647761254138794 | 2.2895816746273  | 0.0011454 | 0.0265670 | 0.0238309 | 498 |
| 177 | GO(BP): antigen processing and presentation of peptide or polysaccharide antigen via MHC class II | 18  | 0.647761254138794 | 2.2895816746273  | 0.0011454 | 0.0265670 | 0.0238309 | 498 |
| 178 | GO(BP): antigen processing and presentation of exogenous peptide antigen via MHC class II         | 18  | 0.647761254138794 | 2.2895816746273  | 0.0011454 | 0.0265670 | 0.0238309 | 498 |
| 179 | GO(BP): negative regulation of lymphocyte apoptotic process                                       | 19  | 0.640127024036927 | 2.28753090655186 | 0.0011402 | 0.0265670 | 0.0238309 | 395 |
| 180 | GO(BP): negative regulation of T cell apoptotic process                                           | 14  | 0.700163216344227 | 2.2849065941373  | 0.0012180 | 0.0265670 | 0.0238309 | 395 |
| 181 | GO(BP): negative regulation of innate immune response                                             | 28  | 0.583512286561377 | 2.28468007986208 | 0.0010905 | 0.0265670 | 0.0238309 | 653 |
| 182 | GO(BP): negative regulation of mononuclear cell proliferation                                     | 36  | 0.547864466186404 | 2.28113584814228 | 0.0010626 | 0.0265670 | 0.0238309 | 729 |
| 183 | GO(BP): negative regulation of lymphocyte proliferation                                           | 36  | 0.547864466186404 | 2.28113584814228 | 0.0010626 | 0.0265670 | 0.0238309 | 729 |

|     |                                                                                    |     |                   |                  |           |           |           |     |
|-----|------------------------------------------------------------------------------------|-----|-------------------|------------------|-----------|-----------|-----------|-----|
| 184 | GO(BP): T cell migration                                                           | 28  | 0.582350625900407 | 2.2801317215279  | 0.0010905 | 0.0265670 | 0.0238309 | 345 |
| 185 | GO(BP): cell chemotaxis                                                            | 72  | 0.489838510633296 | 2.27924425233397 | 0.0010060 | 0.0265670 | 0.0238309 | 351 |
| 186 | GO(BP): T cell costimulation                                                       | 26  | 0.590942540379757 | 2.27192234605719 | 0.0011025 | 0.0265670 | 0.0238309 | 640 |
| 187 | GO(BP): cellular defense response                                                  | 26  | 0.590475959706618 | 2.27012854211669 | 0.0011025 | 0.0265670 | 0.0238309 | 612 |
| 188 | GO(BP): negative regulation of production of molecular mediator of immune response | 12  | 0.719461315386509 | 2.26660390891589 | 0.0012300 | 0.0265670 | 0.0238309 | 402 |
| 189 | GO(BP): myeloid leukocyte activation                                               | 71  | 0.486858644132685 | 2.26071384894702 | 0.0010060 | 0.0265670 | 0.0238309 | 710 |
| 190 | GO(BP): regulation of multicellular organismal process                             | 457 | 0.429285969123836 | 2.25720048368196 | 0.0009990 | 0.0265670 | 0.0238309 | 625 |
| 191 | GO(BP): CD4-positive, alpha-beta T cell differentiation                            | 38  | 0.535494490947425 | 2.25561196204338 | 0.0010559 | 0.0265670 | 0.0238309 | 597 |
| 192 | GO(BP): immune system development                                                  | 54  | 0.504146262119191 | 2.25541219266032 | 0.0010256 | 0.0265670 | 0.0238309 | 412 |
| 193 | GO(BP): MHC class II protein complex assembly                                      | 13  | 0.702813189607503 | 2.25433341891489 | 0.0012210 | 0.0265670 | 0.0238309 | 417 |
| 194 | GO(BP): peptide antigen assembly with MHC class II protein complex                 | 13  | 0.702813189607503 | 2.25433341891489 | 0.0012210 | 0.0265670 | 0.0238309 | 417 |
| 195 | GO(BP): leukocyte degranulation                                                    | 30  | 0.566236468374202 | 2.25306695063874 | 0.0010799 | 0.0265670 | 0.0238309 | 448 |
| 196 | GO(BP): antigen processing and presentation of endogenous peptide antigen          | 14  | 0.689665458605869 | 2.25064830218465 | 0.0012180 | 0.0265670 | 0.0238309 | 558 |
| 197 | GO(BP): regulation of cell development                                             | 151 | 0.445351036880723 | 2.24200450334325 | 0.0009990 | 0.0265670 | 0.0238309 | 571 |
| 198 | GO(BP): B cell proliferation                                                       | 43  | 0.520838291527467 | 2.23575256570012 | 0.0010471 | 0.0265670 | 0.0238309 | 543 |
| 199 | GO(BP): positive regulation of B cell activation                                   | 33  | 0.552506981273622 | 2.23513839506649 | 0.0010706 | 0.0265670 | 0.0238309 | 351 |
| 200 | GO(BP): positive regulation of defense response                                    | 119 | 0.453140019787923 | 2.23258918541427 | 0.0009990 | 0.0265670 | 0.0238309 | 665 |
| 201 | GO(BP): negative regulation of multicellular organismal process                    | 183 | 0.43888960140894  | 2.23253666741902 | 0.0009990 | 0.0265670 | 0.0238309 | 805 |
| 202 | GO(BP): CD8-positive, alpha-beta T cell activation                                 | 20  | 0.612208140016989 | 2.23244003551441 | 0.0011235 | 0.0265670 | 0.0238309 | 559 |
| 203 | GO(BP): regulation of B cell differentiation                                       | 18  | 0.631530905280401 | 2.23221376464264 | 0.0011454 | 0.0265670 | 0.0238309 | 396 |
| 204 | GO(BP): positive regulation of immunoglobulin production                           | 17  | 0.643489207082908 | 2.23001272031003 | 0.0011655 | 0.0265670 | 0.0238309 | 363 |
| 205 | GO(BP): interleukin-2 production                                                   | 27  | 0.572710860037526 | 2.22397961326075 | 0.0010917 | 0.0265670 | 0.0238309 | 624 |
| 206 | GO(BP): regulation of interleukin-2 production                                     | 27  | 0.572710860037526 | 2.22397961326075 | 0.0010917 | 0.0265670 | 0.0238309 | 624 |
| 207 | GO(BP): cell surface receptor signaling pathway                                    | 454 | 0.422668627133145 | 2.2213547832405  | 0.0009990 | 0.0265670 | 0.0238309 | 616 |
| 208 | GO(BP): regulation of response to external stimulus                                | 242 | 0.430664033025095 | 2.21842798289641 | 0.0009990 | 0.0265670 | 0.0238309 | 822 |
| 209 | GO(BP): leukocyte apoptotic process                                                | 39  | 0.522956818508714 | 2.21736896460064 | 0.0010471 | 0.0265670 | 0.0238309 | 596 |
| 210 | GO(BP): mast cell activation                                                       | 25  | 0.581496048596701 | 2.21717352308061 | 0.0011111 | 0.0265670 | 0.0238309 | 355 |
| 211 | GO(BP): negative regulation of T cell receptor signaling pathway                   | 13  | 0.690859738902553 | 2.21599170337229 | 0.0012210 | 0.0265670 | 0.0238309 | 548 |
| 212 | GO(BP): regulation of alpha-beta T cell differentiation                            | 31  | 0.552296219513227 | 2.21553652120279 | 0.0010729 | 0.0265670 | 0.0238309 | 561 |
| 213 | GO(BP): cellular response to cytokine stimulus                                     | 181 | 0.435360198517462 | 2.21488867421031 | 0.0009990 | 0.0265670 | 0.0238309 | 658 |
| 214 | GO(BP): alpha-beta T cell proliferation                                            | 29  | 0.560147210064151 | 2.20973012452875 | 0.0010869 | 0.0265670 | 0.0238309 | 729 |
| 215 | GO(BP): negative regulation of cell-cell adhesion                                  | 63  | 0.482582619356076 | 2.2094840892028  | 0.0010111 | 0.0265670 | 0.0238309 | 793 |
| 216 | GO(BP): positive regulation of alpha-beta T cell proliferation                     | 18  | 0.624929730517236 | 2.20888120396201 | 0.0011454 | 0.0265670 | 0.0238309 | 456 |
| 217 | GO(BP): leukocyte chemotaxis                                                       | 60  | 0.484569403604621 | 2.20504054204317 | 0.0010152 | 0.0265670 | 0.0238309 | 382 |
| 218 | GO(BP): T cell activation involved in immune response                              | 43  | 0.513614236487116 | 2.20474255769196 | 0.0010471 | 0.0265670 | 0.0238309 | 624 |
| 219 | GO(BP): defense response to bacterium                                              | 42  | 0.513092184891825 | 2.2011573724668  | 0.0010449 | 0.0265670 | 0.0238309 | 624 |
| 220 | GO(BP): negative regulation of cell adhesion                                       | 73  | 0.471216297517775 | 2.19853920327135 | 0.0010070 | 0.0265670 | 0.0238309 | 793 |
| 221 | GO(BP): positive regulation of response to biotic stimulus                         | 95  | 0.458041254264921 | 2.19492372586112 | 0.001     | 0.0265670 | 0.0238309 | 892 |

|     |                                                                                           |     |                   |                  |           |           |           |     |
|-----|-------------------------------------------------------------------------------------------|-----|-------------------|------------------|-----------|-----------|-----------|-----|
| 222 | GO(BP): natural killer cell activation                                                    | 40  | 0.517899894851646 | 2.18991490303014 | 0.0010537 | 0.0265670 | 0.0238309 | 720 |
| 223 | GO(BP): neutrophil chemotaxis                                                             | 27  | 0.563813306336277 | 2.18942818527112 | 0.0010917 | 0.0265670 | 0.0238309 | 382 |
| 224 | GO(BP): regulation of calcium-mediated signaling                                          | 19  | 0.611249690683373 | 2.18433608729792 | 0.0011402 | 0.0265670 | 0.0238309 | 351 |
| 225 | GO(BP): positive regulation of gene expression                                            | 197 | 0.427874470489468 | 2.18348520187769 | 0.0009990 | 0.0265670 | 0.0238309 | 598 |
| 226 | GO(BP): regulatory T cell differentiation                                                 | 22  | 0.591877967392718 | 2.18135616793724 | 0.0011337 | 0.0265670 | 0.0238309 | 553 |
| 227 | GO(BP): lymphocyte costimulation                                                          | 28  | 0.556178802662731 | 2.1776587409551  | 0.0010905 | 0.0265670 | 0.0238309 | 640 |
| 228 | GO(BP): positive regulation of CD4-positive, alpha-beta T cell differentiation            | 18  | 0.615758704049331 | 2.17646522661808 | 0.0011454 | 0.0265670 | 0.0238309 | 561 |
| 229 | GO(BP): lymphocyte homeostasis                                                            | 31  | 0.542368801199842 | 2.17571267838535 | 0.0010729 | 0.0265670 | 0.0238309 | 583 |
| 230 | GO(BP): positive regulation of leukocyte migration                                        | 38  | 0.51484941977732  | 2.16865071356044 | 0.0010559 | 0.0265670 | 0.0238309 | 345 |
| 231 | GO(BP): heterotypic cell-cell adhesion                                                    | 12  | 0.687939301425188 | 2.16729638739439 | 0.0012300 | 0.0265670 | 0.0238309 | 446 |
| 232 | GO(BP): MHC protein complex assembly                                                      | 16  | 0.640415444710082 | 2.16716165283245 | 0.0011792 | 0.0265670 | 0.0238309 | 417 |
| 233 | GO(BP): peptide antigen assembly with MHC protein complex                                 | 16  | 0.640415444710082 | 2.16716165283245 | 0.0011792 | 0.0265670 | 0.0238309 | 417 |
| 234 | GO(BP): cytokine-mediated signaling pathway                                               | 128 | 0.435265125436907 | 2.16713230733146 | 0.0009990 | 0.0265670 | 0.0238309 | 815 |
| 235 | GO(BP): positive regulation of lymphocyte migration                                       | 14  | 0.66361644098211  | 2.1656401630109  | 0.0012180 | 0.0265670 | 0.0238309 | 345 |
| 236 | GO(BP): lymphocyte apoptotic process                                                      | 31  | 0.539745165036959 | 2.16518796079387 | 0.0010729 | 0.0265670 | 0.0238309 | 571 |
| 237 | GO(BP): antigen processing and presentation of peptide antigen via MHC class I            | 18  | 0.612484222720036 | 2.16489122092145 | 0.0011454 | 0.0265670 | 0.0238309 | 588 |
| 238 | GO(BP): T cell apoptotic process                                                          | 25  | 0.567561975890554 | 2.16404460303496 | 0.0011111 | 0.0265670 | 0.0238309 | 571 |
| 239 | GO(BP): positive regulation of innate immune response                                     | 91  | 0.452644372550196 | 2.16266091605088 | 0.0010010 | 0.0265670 | 0.0238309 | 624 |
| 240 | GO(BP): chemotaxis                                                                        | 104 | 0.445727863827166 | 2.16113858547963 | 0.001     | 0.0265670 | 0.0238309 | 351 |
| 241 | GO(BP): taxis                                                                             | 104 | 0.445727863827166 | 2.16113858547963 | 0.001     | 0.0265670 | 0.0238309 | 351 |
| 242 | GO(BP): neutrophil migration                                                              | 33  | 0.533616526723293 | 2.15871803895014 | 0.0010706 | 0.0265670 | 0.0238309 | 596 |
| 243 | GO(BP): calcium-mediated signaling                                                        | 36  | 0.517711565649717 | 2.15558862508821 | 0.0010626 | 0.0265670 | 0.0238309 | 448 |
| 244 | GO(BP): phagocytosis                                                                      | 62  | 0.470988200407966 | 2.1519344321113  | 0.0010111 | 0.0265670 | 0.0238309 | 425 |
| 245 | GO(BP): response to cytokine                                                              | 198 | 0.420819224436597 | 2.14914465263555 | 0.0009990 | 0.0265670 | 0.0238309 | 693 |
| 246 | GO(BP): antigen processing and presentation of endogenous peptide antigen via MHC class I | 12  | 0.681619702295186 | 2.1473870082735  | 0.0012300 | 0.0265670 | 0.0238309 | 558 |
| 247 | GO(BP): positive regulation of cytokine production involved in immune response            | 27  | 0.552614847441883 | 2.1459417665232  | 0.0010917 | 0.0265670 | 0.0238309 | 615 |
| 248 | GO(BP): inflammatory response                                                             | 198 | 0.420094352283334 | 2.14544269459379 | 0.0009990 | 0.0265670 | 0.0238309 | 800 |
| 249 | GO(BP): leukocyte homeostasis                                                             | 38  | 0.508247096355171 | 2.14084038135342 | 0.0010559 | 0.0265670 | 0.0238309 | 597 |
| 250 | GO(BP): regulation of alpha-beta T cell proliferation                                     | 27  | 0.550933271303069 | 2.13941178549468 | 0.0010917 | 0.0265670 | 0.0238309 | 729 |
| 251 | GO(BP): regulation of immunoglobulin production                                           | 24  | 0.564831919585569 | 2.13939686778944 | 0.0011111 | 0.0265670 | 0.0238309 | 399 |
| 252 | GO(BP): small GTPase mediated signal transduction                                         | 87  | 0.44889886011211  | 2.13584602378098 | 0.0010040 | 0.0265670 | 0.0238309 | 391 |
| 253 | GO(BP): regulation of phosphatidylinositol 3-kinase signaling                             | 19  | 0.597160026990012 | 2.13398585999737 | 0.0011402 | 0.0265670 | 0.0238309 | 405 |
| 254 | GO(BP): negative regulation of leukocyte mediated cytotoxicity                            | 15  | 0.639347867796088 | 2.13053378345995 | 0.0011820 | 0.0265670 | 0.0238309 | 318 |
| 255 | GO(BP): positive regulation of cell population proliferation                              | 147 | 0.42350461118287  | 2.1284479681686  | 0.0009990 | 0.0265670 | 0.0238309 | 408 |
| 256 | GO(BP): positive regulation of cell development                                           | 87  | 0.446717746626005 | 2.12546835749431 | 0.0010040 | 0.0265670 | 0.0238309 | 561 |
| 257 | GO(BP): positive regulation of interleukin-12 production                                  | 19  | 0.593168163319163 | 2.1197207045221  | 0.0011402 | 0.0265670 | 0.0238309 | 615 |

|     |                                                                                                                                                          |     |                   |                  |            |           |           |     |
|-----|----------------------------------------------------------------------------------------------------------------------------------------------------------|-----|-------------------|------------------|------------|-----------|-----------|-----|
| 258 | GO(BP): negative regulation of adaptive immune response                                                                                                  | 26  | 0.550975308879218 | 2.11826536563781 | 0.00110251 | 0.0265670 | 0.0238309 | 402 |
| 259 | GO(BP): tolerance induction                                                                                                                              | 16  | 0.625854366166091 | 2.11788705880902 | 0.0011792  | 0.0265670 | 0.0238309 | 624 |
| 260 | GO(BP): myeloid leukocyte migration                                                                                                                      | 51  | 0.477163849268367 | 2.1178706743077  | 0.0010277  | 0.0265670 | 0.0238309 | 612 |
| 261 | GO(BP): positive regulation of myeloid cell differentiation                                                                                              | 20  | 0.58030501896703  | 2.11610410328094 | 0.00112351 | 0.0265670 | 0.0238309 | 294 |
| 262 | GO(BP): tumor necrosis factor superfamily cytokine production                                                                                            | 52  | 0.474336819454721 | 2.11541431221459 | 0.00102451 | 0.0265670 | 0.0238309 | 892 |
| 263 | GO(BP): regulation of tumor necrosis factor superfamily cytokine production                                                                              | 52  | 0.474336819454721 | 2.11541431221459 | 0.00102451 | 0.0265670 | 0.0238309 | 892 |
| 264 | GO(BP): phosphatidylinositol 3-kinase signaling                                                                                                          | 29  | 0.535769108722509 | 2.11356071772715 | 0.00108691 | 0.0265670 | 0.0238309 | 405 |
| 265 | GO(BP): regulation of multicellular organismal development                                                                                               | 195 | 0.414061714123064 | 2.11268040745976 | 0.00099901 | 0.0265670 | 0.0238309 | 587 |
| 266 | GO(BP): positive regulation of mononuclear cell migration                                                                                                | 23  | 0.560919770379568 | 2.10501158007045 | 0.00112101 | 0.0265670 | 0.0238309 | 612 |
| 267 | GO(BP): regulation of inflammatory response                                                                                                              | 96  | 0.435988253816259 | 2.09964739046506 | 0.00099901 | 0.0265670 | 0.0238309 | 800 |
| 268 | GO(BP): regulation of B cell proliferation                                                                                                               | 32  | 0.519266881801277 | 2.09899856405422 | 0.00107061 | 0.0265670 | 0.0238309 | 366 |
| 269 | GO(BP): regulation of leukocyte degranulation                                                                                                            | 17  | 0.605162531281535 | 2.09719157331409 | 0.00116551 | 0.0265670 | 0.0238309 | 553 |
| 270 | GO(BP): Fc receptor signaling pathway                                                                                                                    | 16  | 0.618230162032162 | 2.09208680216484 | 0.00117921 | 0.0265670 | 0.0238309 | 635 |
| 271 | GO(BP): regulation of CD4-positive, alpha-beta T cell activation                                                                                         | 36  | 0.502449270704764 | 2.09204121460145 | 0.00106261 | 0.0265670 | 0.0238309 | 561 |
| 272 | GO(BP): negative regulation of leukocyte differentiation                                                                                                 | 28  | 0.533963461788499 | 2.09067694480167 | 0.00109051 | 0.0265670 | 0.0238309 | 792 |
| 273 | GO(BP): negative regulation of hemopoiesis                                                                                                               | 28  | 0.533963461788499 | 2.09067694480167 | 0.00109051 | 0.0265670 | 0.0238309 | 792 |
| 274 | GO(BP): positive regulation of phosphatidylinositol 3-kinase signaling                                                                                   | 13  | 0.650987813306702 | 2.08809909168495 | 0.00122101 | 0.0265670 | 0.0238309 | 309 |
| 275 | GO(BP): regulated exocytosis                                                                                                                             | 41  | 0.491991579666682 | 2.08769695592446 | 0.00105371 | 0.0265670 | 0.0238309 | 461 |
| 276 | GO(BP): tumor necrosis factor production                                                                                                                 | 50  | 0.470410755504822 | 2.08459529898351 | 0.00102881 | 0.0265670 | 0.0238309 | 892 |
| 277 | GO(BP): regulation of tumor necrosis factor production                                                                                                   | 50  | 0.470410755504822 | 2.08459529898351 | 0.00102881 | 0.0265670 | 0.0238309 | 892 |
| 278 | GO(BP): granulocyte migration                                                                                                                            | 41  | 0.490545177222293 | 2.08155935092269 | 0.00105371 | 0.0265670 | 0.0238309 | 596 |
| 279 | GO(BP): regulation of chemotaxis                                                                                                                         | 49  | 0.471181748019827 | 2.08144205334678 | 0.00102881 | 0.0265670 | 0.0238309 | 382 |
| 280 | GO(BP): negative regulation of defense response                                                                                                          | 67  | 0.451823762871228 | 2.08108601040414 | 0.00100701 | 0.0265670 | 0.0238309 | 800 |
| 281 | GO(BP): response to chemokine                                                                                                                            | 32  | 0.514498330719382 | 2.07972296180746 | 0.00107061 | 0.0265670 | 0.0238309 | 345 |
| 282 | GO(BP): cellular response to chemokine                                                                                                                   | 32  | 0.514498330719382 | 2.07972296180746 | 0.00107061 | 0.0265670 | 0.0238309 | 345 |
| 283 | GO(BP): regulation of T cell migration                                                                                                                   | 15  | 0.62352016831168  | 2.07779027688938 | 0.00118201 | 0.0265670 | 0.0238309 | 573 |
| 284 | GO(BP): regulation of small GTPase mediated signal transduction                                                                                          | 56  | 0.460667239397815 | 2.07710748017988 | 0.00101721 | 0.0265670 | 0.0238309 | 349 |
| 285 | GO(BP): positive regulation of antigen receptor-mediated signaling pathway                                                                               | 13  | 0.646407598998018 | 2.07340766253344 | 0.00122101 | 0.0265670 | 0.0238309 | 396 |
| 286 | GO(BP): phosphatidylinositol-mediated signaling                                                                                                          | 35  | 0.502712817528374 | 2.06951410629383 | 0.00106951 | 0.0265670 | 0.0238309 | 405 |
| 287 | GO(BP): positive regulation of chemotaxis                                                                                                                | 34  | 0.504490529459479 | 2.06287740003005 | 0.00106491 | 0.0265670 | 0.0238309 | 345 |
| 288 | GO(BP): negative regulation of adaptive immune response based on somatic recombination of immune receptors built from immunoglobulin superfamily domains | 23  | 0.549167206260567 | 2.06090672787514 | 0.00112101 | 0.0265670 | 0.0238309 | 402 |
| 289 | GO(BP): regulation of myeloid leukocyte mediated immunity                                                                                                | 19  | 0.57650123438446  | 2.06016047096877 | 0.00114021 | 0.0265670 | 0.0238309 | 553 |
| 290 | GO(BP): response to molecule of bacterial origin                                                                                                         | 76  | 0.440284590433657 | 2.05963036122198 | 0.00101011 | 0.0265670 | 0.0238309 | 717 |
| 291 | GO(BP): regulation of lymphocyte migration                                                                                                               | 24  | 0.542916164503764 | 2.05638722164257 | 0.00111111 | 0.0265670 | 0.0238309 | 612 |
| 292 | GO(BP): negative regulation of response to biotic stimulus                                                                                               | 40  | 0.485900114176301 | 2.05460536292161 | 0.00105371 | 0.0265670 | 0.0238309 | 653 |
| 293 | GO(BP): G protein-coupled receptor signaling pathway                                                                                                     | 120 | 0.416249376360462 | 2.05452072404137 | 0.00099901 | 0.0265670 | 0.0238309 | 814 |

|     |                                                                                     |    |                   |                  |           |           |           |     |
|-----|-------------------------------------------------------------------------------------|----|-------------------|------------------|-----------|-----------|-----------|-----|
| 294 | GO(BP): interleukin-6 production                                                    | 46 | 0.473042216691643 | 2.05435766503021 | 0.0010351 | 0.0265670 | 0.0238309 | 624 |
| 295 | GO(BP): regulation of interleukin-6 production                                      | 46 | 0.473042216691643 | 2.05435766503021 | 0.0010351 | 0.0265670 | 0.0238309 | 624 |
| 296 | GO(BP): regulation of ERK1 and ERK2 cascade                                         | 48 | 0.468345154370894 | 2.05260956543118 | 0.0010341 | 0.0265670 | 0.0238309 | 699 |
| 297 | GO(BP): regulation of inflammatory response to antigenic stimulus                   | 13 | 0.638950269144313 | 2.0494876391849  | 0.0012210 | 0.0265670 | 0.0238309 | 351 |
| 298 | GO(BP): positive regulation of B cell mediated immunity                             | 14 | 0.627519475709929 | 2.04784163824778 | 0.0012180 | 0.0265670 | 0.0238309 | 345 |
| 299 | GO(BP): positive regulation of immunoglobulin mediated immune response              | 14 | 0.627519475709929 | 2.04784163824778 | 0.0012180 | 0.0265670 | 0.0238309 | 345 |
| 300 | GO(BP): T cell cytokine production                                                  | 17 | 0.59059978979148  | 2.04672437291981 | 0.0011655 | 0.0265670 | 0.0238309 | 568 |
| 301 | GO(BP): regulation of T cell cytokine production                                    | 17 | 0.59059978979148  | 2.04672437291981 | 0.0011655 | 0.0265670 | 0.0238309 | 568 |
| 302 | GO(BP): regulation of myeloid cell differentiation                                  | 42 | 0.476823807468322 | 2.04556660592651 | 0.0010449 | 0.0265670 | 0.0238309 | 684 |
| 303 | GO(BP): inositol lipid-mediated signaling                                           | 36 | 0.490705694621479 | 2.04314464612086 | 0.0010626 | 0.0265670 | 0.0238309 | 405 |
| 304 | GO(BP): leukocyte adhesion to vascular endothelial cell                             | 13 | 0.635936171692191 | 2.03981966380444 | 0.0012210 | 0.0265670 | 0.0238309 | 569 |
| 305 | GO(BP): negative regulation of T cell proliferation                                 | 26 | 0.530568745760497 | 2.03981082295781 | 0.0011025 | 0.0265670 | 0.0238309 | 666 |
| 306 | GO(BP): interleukin-4 production                                                    | 18 | 0.575684980033671 | 2.0348203481168  | 0.0011454 | 0.0265670 | 0.0238309 | 624 |
| 307 | GO(BP): regulation of interleukin-4 production                                      | 18 | 0.575684980033671 | 2.0348203481168  | 0.0011454 | 0.0265670 | 0.0238309 | 624 |
| 308 | GO(BP): positive regulation of interleukin-4 production                             | 14 | 0.621792021474779 | 2.02915071355476 | 0.0012180 | 0.0265670 | 0.0238309 | 624 |
| 309 | GO(BP): negative regulation of cytokine production                                  | 78 | 0.430917508334525 | 2.02641247000649 | 0.0010080 | 0.0265670 | 0.0238309 | 814 |
| 310 | GO(BP): mast cell activation involved in immune response                            | 19 | 0.566990897595397 | 2.02617473295149 | 0.0011402 | 0.0265670 | 0.0238309 | 601 |
| 311 | GO(BP): regulation of regulatory T cell differentiation                             | 19 | 0.566853026083313 | 2.02568204113693 | 0.0011402 | 0.0265670 | 0.0238309 | 553 |
| 312 | GO(BP): negative regulation of cell killing                                         | 17 | 0.58437744646272  | 2.02516083367076 | 0.0011655 | 0.0265670 | 0.0238309 | 318 |
| 313 | GO(BP): dendritic cell migration                                                    | 17 | 0.584154677697165 | 2.02438882821145 | 0.0011655 | 0.0265670 | 0.0238309 | 597 |
| 314 | GO(BP): chemokine-mediated signaling pathway                                        | 30 | 0.50866945725827  | 2.02400658904676 | 0.0010799 | 0.0265670 | 0.0238309 | 345 |
| 315 | GO(BP): inflammatory response to antigenic stimulus                                 | 22 | 0.548436326788186 | 2.02125274138895 | 0.0011337 | 0.0265670 | 0.0238309 | 351 |
| 316 | GO(BP): granulocyte chemotaxis                                                      | 34 | 0.493939982305381 | 2.01973588594561 | 0.0010649 | 0.0265670 | 0.0238309 | 382 |
| 317 | GO(BP): regulation of leukocyte chemotaxis                                          | 36 | 0.484792860475902 | 2.01852545877425 | 0.0010626 | 0.0265670 | 0.0238309 | 382 |
| 318 | GO(BP): CD4-positive, alpha-beta T cell differentiation involved in immune response | 29 | 0.511509844605614 | 2.01786011303813 | 0.0010869 | 0.0265670 | 0.0238309 | 597 |
| 319 | GO(BP): peptidyl-tyrosine phosphorylation                                           | 66 | 0.438643543677224 | 2.01767750436156 | 0.0010060 | 0.0265670 | 0.0238309 | 678 |
| 320 | GO(BP): peptidyl-tyrosine modification                                              | 66 | 0.438643543677224 | 2.01767750436156 | 0.0010060 | 0.0265670 | 0.0238309 | 678 |
| 321 | GO(BP): positive regulation of interleukin-2 production                             | 14 | 0.618263730878374 | 2.0176365204901  | 0.0012180 | 0.0265670 | 0.0238309 | 561 |
| 322 | GO(BP): ERK1 and ERK2 cascade                                                       | 49 | 0.456497964418065 | 2.01657654270382 | 0.0010288 | 0.0265670 | 0.0238309 | 699 |
| 323 | GO(BP): defense response to Gram-positive bacterium                                 | 20 | 0.552754365993778 | 2.01563960978312 | 0.0011235 | 0.0265670 | 0.0238309 | 624 |
| 324 | GO(BP): exocytosis                                                                  | 56 | 0.446584564679896 | 2.01360995637991 | 0.0010172 | 0.0265670 | 0.0238309 | 461 |
| 325 | GO(BP): receptor signaling pathway via JAK-STAT                                     | 38 | 0.477973307401014 | 2.01332101064886 | 0.0010559 | 0.0265670 | 0.0238309 | 519 |
| 326 | GO(BP): receptor signaling pathway via STAT                                         | 38 | 0.477973307401014 | 2.01332101064886 | 0.0010559 | 0.0265670 | 0.0238309 | 519 |
| 327 | GO(BP): response to lipopolysaccharide                                              | 71 | 0.433481800637233 | 2.01286004013109 | 0.0010060 | 0.0265670 | 0.0238309 | 717 |
| 328 | GO(BP): mast cell degranulation                                                     | 17 | 0.578329041769799 | 2.00420007900024 | 0.0011655 | 0.0265670 | 0.0238309 | 448 |
| 329 | GO(BP): positive thymic T cell selection                                            | 10 | 0.833668341708543 | 2.45073398588754 | 0.0012787 | 0.0267793 | 0.0240213 | 341 |
| 330 | GO(BP): regulation of T cell differentiation in thymus                              | 11 | 0.756881062560535 | 2.30329041443026 | 0.0012610 | 0.0267793 | 0.0240213 | 349 |
| 331 | GO(BP): regulation of cell adhesion mediated by integrin                            | 10 | 0.778513878298639 | 2.2885964652579  | 0.0012787 | 0.0267793 | 0.0240213 | 351 |

|     |                                                                                        |     |                    |                   |           |           |           |      |
|-----|----------------------------------------------------------------------------------------|-----|--------------------|-------------------|-----------|-----------|-----------|------|
| 332 | GO(BP): positive regulation of T cell migration                                        | 11  | 0.727815287710858  | 2.21483936985958  | 0.0012610 | 0.0267793 | 0.0240213 | 345  |
| 333 | GO(BP): T cell lineage commitment                                                      | 11  | 0.724558815569011  | 2.20492948911319  | 0.0012610 | 0.0267793 | 0.0240213 | 399  |
| 334 | GO(BP): positive regulation of calcium-mediated signaling                              | 11  | 0.693722753619103  | 2.11109122386749  | 0.0012610 | 0.0267793 | 0.0240213 | 351  |
| 335 | GO(BP): B cell homeostasis                                                             | 11  | 0.669318618651451  | 2.03682617361865  | 0.0012610 | 0.0267793 | 0.0240213 | 583  |
| 336 | GO(BP): natural killer cell differentiation                                            | 11  | 0.660719348206898  | 2.01065744227395  | 0.0012610 | 0.0267793 | 0.0240213 | 416  |
| 337 | GO(BP): regulation of B cell receptor signaling pathway                                | 10  | 0.682090983561296  | 2.00514217854939  | 0.0012787 | 0.0267793 | 0.0240213 | 423  |
| 338 | GO(BP): negative regulation of cytokine production involved in immune response         | 9   | 0.802611752887996  | 2.2654844762119   | 0.0013210 | 0.0274707 | 0.0246414 | 402  |
| 339 | GO(BP): CD4-positive, CD25-positive, alpha-beta regulatory T cell differentiation      | 9   | 0.730620375494093  | 2.06227869543415  | 0.0013210 | 0.0274707 | 0.0246414 | 399  |
| 340 | GO(BP): gamma-delta T cell differentiation                                             | 9   | 0.729561090428052  | 2.05928871445722  | 0.0013210 | 0.0274707 | 0.0246414 | 351  |
| 341 | GO(BP): negative T cell selection                                                      | 8   | 0.844442879264409  | 2.28680111922289  | 0.0013513 | 0.0277788 | 0.0249178 | 200  |
| 342 | GO(BP): alpha-beta T cell lineage commitment                                           | 8   | 0.753441603782668  | 2.04036429829353  | 0.0013513 | 0.0277788 | 0.0249178 | 399  |
| 343 | GO(BP): CD4-positive or CD8-positive, alpha-beta T cell lineage commitment             | 8   | 0.753441603782668  | 2.04036429829353  | 0.0013513 | 0.0277788 | 0.0249178 | 399  |
| 344 | GO(BP): CD4-positive, alpha-beta T cell lineage commitment                             | 8   | 0.753441603782668  | 2.04036429829353  | 0.0013513 | 0.0277788 | 0.0249178 | 399  |
| 345 | GO(BP): negative thymic T cell selection                                               | 7   | 0.83561412673753   | 2.1776148491214   | 0.0013755 | 0.0282106 | 0.0253052 | 200  |
| 346 | GO(BP): antigen processing and presentation of lipid antigen via MHC class Ib          | 5   | 0.907769423558897  | 2.08610732393129  | 0.0014577 | 0.0289024 | 0.0259257 | 189  |
| 347 | GO(BP): antigen processing and presentation, endogenous lipid antigen via MHC class Ib | 5   | 0.907769423558897  | 2.08610732393129  | 0.0014577 | 0.0289024 | 0.0259257 | 189  |
| 348 | GO(BP): antigen processing and presentation, exogenous lipid antigen via MHC class Ib  | 5   | 0.907769423558897  | 2.08610732393129  | 0.0014577 | 0.0289024 | 0.0259257 | 189  |
| 349 | GO(BP): natural killer cell cytokine production                                        | 6   | 0.843530591775326  | 2.07503997346434  | 0.0014306 | 0.0289024 | 0.0259257 | 318  |
| 350 | GO(BP): regulation of natural killer cell cytokine production                          | 6   | 0.843530591775326  | 2.07503997346434  | 0.0014306 | 0.0289024 | 0.0259257 | 318  |
| 351 | GO(BP): regulation of gamma-delta T cell activation                                    | 6   | 0.826980942828485  | 2.03432872547128  | 0.0014306 | 0.0289024 | 0.0259257 | 351  |
| 352 | GO(BP): T-helper cell lineage commitment                                               | 6   | 0.823943161910263  | 2.02685594748623  | 0.0014306 | 0.0289024 | 0.0259257 | 235  |
| 353 | GO(BP): cell recognition                                                               | 23  | 0.536188760489474  | 2.01220140479305  | 0.0022421 | 0.0419441 | 0.0376243 | 314  |
| 354 | GO(BP): male genitalia development                                                     | 4   | -0.879258517034068 | -2.13228361587864 | 0.0028901 | 0.0523156 | 0.0469275 | 246  |
| 355 | HALLMARK_ALLOGRAFT_REJECTION                                                           | 109 | 0.654457952477157  | 3.13686497053739  | 1e-10     | 2.05e-09  | 8.4210526 | 499  |
| 356 | HALLMARK_INTERFERON_GAMMA_RESPONSE                                                     | 103 | 0.53959000212048   | 2.56687316096843  | 1e-10     | 2.05e-09  | 8.4210526 | 616  |
| 357 | HALLMARK_KRAS_SIGNALING_UP                                                             | 34  | 0.615563899157586  | 2.53152112658311  | 1.0285931 | 1.4057440 | 5.7745582 | 599  |
| 358 | HALLMARK_INFLAMMATORY_RESPONSE                                                         | 61  | 0.501157707166195  | 2.24836876226245  | 8.4021416 | 8.6121951 | 3.5377438 | 615  |
| 359 | HALLMARK_PROTEIN_SECRETION                                                             | 16  | -0.644153225806452 | -3.26702176133847 | 1.3381003 | 1.0972422 | 4.5072854 | 723  |
| 360 | HALLMARK_ADIPOGENESIS                                                                  | 27  | -0.48429110022344  | -3.15867454386599 | 3.7826866 | 2.5848358 | 1.0618067 | 888  |
| 361 | HALLMARK_COMPLEMENT                                                                    | 45  | 0.524754125123553  | 2.25311443211423  | 4.7636117 | 2.7901154 | 1.1461321 | 657  |
| 362 | HALLMARK_MYOGENESIS                                                                    | 20  | -0.532150495316646 | -2.99232620626682 | 1.2811928 | 6.5661134 | 2.6972481 | 759  |
| 363 | HALLMARK_OXIDATIVE_PHOSPHORYLATION                                                     | 11  | -0.663147310206134 | -2.72082198265307 | 8.4291895 | 0.0003839 | 0.0001577 | 682  |
| 364 | HALLMARK_PEROXISOME                                                                    | 17  | -0.502269288956127 | -2.66438199234054 | 0.0001471 | 0.0006034 | 0.0002478 | 1005 |

|     |                                                                                    |     |                    |                   |           |           |           |     |
|-----|------------------------------------------------------------------------------------|-----|--------------------|-------------------|-----------|-----------|-----------|-----|
| 365 | HALLMARK_EPITHELIAL_MESENCHYMAL_TRANSITION                                         | 33  | -0.344673018450739 | -2.4925880029223  | 0.0001750 | 0.0006526 | 0.0002680 | 750 |
| 366 | HALLMARK_ESTROGEN_RESPONSE_EARLY                                                   | 33  | -0.335801639683451 | -2.42843243778954 | 0.0002670 | 0.0009124 | 0.0003748 | 768 |
| 367 | HALLMARK_IL6_JAK_STAT3_SIGNALING                                                   | 34  | 0.493349517789174  | 2.0289115862416   | 0.0003938 | 0.0012420 | 0.0005102 | 568 |
| 368 | Reactome: TCR signaling                                                            | 39  | 0.672647131742127  | 2.80292255329653  | 0.0010504 | 0.0092608 | 0.0055059 | 376 |
| 369 | Reactome: Immunoregulatory interactions between a Lymphoid and a non-Lymphoid cell | 81  | 0.587189012421114  | 2.74016500594368  | 0.0010121 | 0.0092608 | 0.0055059 | 532 |
| 370 | Reactome: Generation of second messenger molecules                                 | 22  | 0.739908174661676  | 2.72304325533513  | 0.0011376 | 0.0092608 | 0.0055059 | 417 |
| 371 | Reactome: Adaptive Immune System                                                   | 213 | 0.537955900233354  | 2.70715454842698  | 0.001     | 0.0092608 | 0.0055059 | 580 |
| 372 | Reactome: Downstream TCR signaling                                                 | 28  | 0.678248814977203  | 2.62828409877528  | 0.0010857 | 0.0092608 | 0.0055059 | 488 |
| 373 | Reactome: Costimulation by the CD28 family                                         | 32  | 0.655171239851981  | 2.59891116840428  | 0.0010787 | 0.0092608 | 0.0055059 | 434 |
| 374 | Reactome: Immune System                                                            | 446 | 0.492625118133771  | 2.57355172806112  | 0.0009990 | 0.0092608 | 0.0055059 | 636 |
| 375 | Reactome: PD-1 signaling                                                           | 19  | 0.71564872818373   | 2.5109196112871   | 0.0011574 | 0.0092608 | 0.0055059 | 417 |
| 376 | Reactome: Phosphorylation of CD3 and TCR zeta chains                               | 17  | 0.738730245112413  | 2.50189820854051  | 0.0011806 | 0.0092608 | 0.0055059 | 417 |
| 377 | Reactome: Cytokine Signaling in Immune system                                      | 185 | 0.490527815889159  | 2.44902221823706  | 0.001     | 0.0092608 | 0.0055059 | 573 |
| 378 | Reactome: Translocation of ZAP-70 to Immunological synapse                         | 16  | 0.736103467998089  | 2.43919581688018  | 0.0011918 | 0.0092608 | 0.0055059 | 417 |
| 379 | Reactome: RAC1 GTPase cycle                                                        | 35  | 0.574858900484465  | 2.34011501297706  | 0.0010660 | 0.0092608 | 0.0055059 | 391 |
| 380 | Reactome: Interferon Signaling                                                     | 57  | 0.523996538528476  | 2.33716189482596  | 0.0010256 | 0.0092608 | 0.0055059 | 610 |
| 381 | Reactome: Fc epsilon receptor (FCER1) signaling                                    | 29  | 0.595509093839593  | 2.31649444706295  | 0.0010869 | 0.0092608 | 0.0055059 | 593 |
| 382 | Reactome: Hemostasis                                                               | 92  | 0.489399289142995  | 2.31209478449933  | 0.0010070 | 0.0092608 | 0.0055059 | 421 |
| 383 | Reactome: Cell surface interactions at the vascular wall                           | 26  | 0.601668409815204  | 2.28953401920434  | 0.0011013 | 0.0092608 | 0.0055059 | 408 |
| 384 | Reactome: Interferon gamma signaling                                               | 45  | 0.534689331848426  | 2.2860970189742   | 0.0010460 | 0.0092608 | 0.0055059 | 672 |
| 385 | Reactome: Interleukin-2 family signaling                                           | 25  | 0.597695363362487  | 2.25992550089098  | 0.0011074 | 0.0092608 | 0.0055059 | 729 |
| 386 | Reactome: TNFR2 non-canonical NF-kB pathway                                        | 30  | 0.564063201127008  | 2.20964500482122  | 0.0010822 | 0.0092608 | 0.0055059 | 573 |
| 387 | Reactome: Constitutive Signaling by Aberrant PI3K in Cancer                        | 15  | 0.66991278103234   | 2.19585441157902  | 0.0012004 | 0.0092608 | 0.0055059 | 423 |
| 388 | Reactome: Host Interactions of HIV factors                                         | 25  | 0.576404971313768  | 2.17942512751652  | 0.0011074 | 0.0092608 | 0.0055059 | 488 |
| 389 | Reactome: ER-Phagosome pathway                                                     | 24  | 0.580802516464053  | 2.17940203006833  | 0.0011223 | 0.0092608 | 0.0055059 | 488 |
| 390 | Reactome: CDC42 GTPase cycle                                                       | 26  | 0.570720736272657  | 2.17176856860896  | 0.0011013 | 0.0092608 | 0.0055059 | 425 |
| 391 | Reactome: Signaling by Interleukins                                                | 113 | 0.446923285153707  | 2.15287039059296  | 0.0010040 | 0.0092608 | 0.0055059 | 569 |
| 392 | Reactome: Innate Immune System                                                     | 198 | 0.428497467679774  | 2.14985920126154  | 0.0009990 | 0.0092608 | 0.0055059 | 636 |
| 393 | Reactome: Chemokine receptors bind chemokines                                      | 27  | 0.554949704069439  | 2.14293565255158  | 0.0010893 | 0.0092608 | 0.0055059 | 345 |
| 394 | Reactome: Antigen processing-Cross presentation                                    | 34  | 0.529092021238866  | 2.13245031027992  | 0.0010718 | 0.0092608 | 0.0055059 | 498 |
| 395 | Reactome: Signaling by the B Cell Receptor (BCR)                                   | 30  | 0.544077418700541  | 2.1313532740048   | 0.0010822 | 0.0092608 | 0.0055059 | 500 |
| 396 | Reactome: Class A/1 (Rhodopsin-like receptors)                                     | 56  | 0.471175117936394  | 2.0902022641121   | 0.0010319 | 0.0092608 | 0.0055059 | 900 |
| 397 | Reactome: GPCR downstream signalling                                               | 98  | 0.439311629482937  | 2.08662432391228  | 0.0010090 | 0.0092608 | 0.0055059 | 609 |
| 398 | Reactome: HIV Infection                                                            | 34  | 0.509297210684273  | 2.05266938708581  | 0.0010718 | 0.0092608 | 0.0055059 | 502 |
| 399 | Reactome: RHO GTPase cycle                                                         | 69  | 0.443892856263626  | 2.02712786043181  | 0.0010172 | 0.0092608 | 0.0055059 | 425 |
| 400 | Reactome: Platelet activation, signaling and aggregation                           | 52  | 0.463180168633088  | 2.02527662323185  | 0.0010309 | 0.0092608 | 0.0055059 | 486 |
| 401 | Reactome: G alpha (q) signalling events                                            | 29  | 0.519414396084488  | 2.02049066370492  | 0.0010869 | 0.0092608 | 0.0055059 | 595 |
| 402 | Reactome: Signaling by GPCR                                                        | 105 | 0.41748088159525   | 2.00262582550917  | 0.0010060 | 0.0092608 | 0.0055059 | 779 |

|     |                                                                                                                                 |    |                    |                   |            |            |            |      |
|-----|---------------------------------------------------------------------------------------------------------------------------------|----|--------------------|-------------------|------------|------------|------------|------|
| 403 | Reactome: GPVI-mediated activation cascade                                                                                      | 13 | 0.703763711665854  | 2.22562366295748  | 0.00123761 | 0.00932531 | 0.00554431 | 351  |
| 404 | Reactome: DAP12 signaling                                                                                                       | 14 | 0.686282684606398  | 2.22262781393522  | 0.00241541 | 0.01397511 | 0.00830881 | 351  |
| 405 | Reactome: DAP12 interactions                                                                                                    | 18 | 0.624759531212061  | 2.14040204263718  | 0.00236121 | 0.01397511 | 0.00830881 | 492  |
| 406 | Reactome: Negative regulation of the PI3K/AKT network                                                                           | 18 | 0.598882937838207  | 2.05174983239169  | 0.00236121 | 0.01397511 | 0.00830881 | 423  |
| 407 | Reactome: PI5P, PP2A and IER3 Regulate PI3K/AKT Signaling                                                                       | 18 | 0.598882937838207  | 2.05174983239169  | 0.00236121 | 0.01397511 | 0.00830881 | 423  |
| 408 | Reactome: Beta-catenin independent WNT signaling                                                                                | 22 | 0.553890798332614  | 2.03845376256516  | 0.00227531 | 0.01397511 | 0.00830881 | 306  |
| 409 | Reactome: PI3K/AKT Signaling in Cancer                                                                                          | 18 | 0.592960959270586  | 2.03146136236547  | 0.00236121 | 0.01397511 | 0.00830881 | 423  |
| 410 | Reactome: Interferon alpha/beta signaling                                                                                       | 23 | 0.545856285717041  | 2.02995062911858  | 0.00225471 | 0.01397511 | 0.00830881 | 610  |
| 411 | Reactome: Parasite infection                                                                                                    | 16 | 0.606501690163984  | 2.00973973075017  | 0.00238371 | 0.01397511 | 0.00830881 | 351  |
| 412 | Reactome: Leishmania phagocytosis                                                                                               | 16 | 0.606501690163984  | 2.00973973075017  | 0.00238371 | 0.01397511 | 0.00830881 | 351  |
| 413 | Reactome: FCGR3A-mediated phagocytosis                                                                                          | 16 | 0.606501690163984  | 2.00973973075017  | 0.00238371 | 0.01397511 | 0.00830881 | 351  |
| 414 | Reactome: Translation                                                                                                           | 12 | -0.643360160965795 | -2.78325257667321 | 0.00476191 | 0.02324581 | 0.01382061 | 722  |
| 415 | Reactome: Glycosaminoglycan metabolism                                                                                          | 12 | -0.566008214810453 | -2.44861885747563 | 0.00476191 | 0.02324581 | 0.01382061 | 678  |
| 416 | Reactome: Metabolism of steroids                                                                                                | 13 | -0.557815695657282 | -2.5703922907265  | 0.00515461 | 0.02385861 | 0.01418491 | 576  |
| 417 | Reactome: COPI-mediated anterograde transport                                                                                   | 15 | -0.681767076977396 | -3.43325595698382 | 0.00591711 | 0.02590751 | 0.01540311 | 543  |
| 418 | Reactome: Protein localization                                                                                                  | 15 | -0.593471881953643 | -2.98861729001809 | 0.00591711 | 0.02590751 | 0.01540311 | 701  |
| 419 | Reactome: Collagen biosynthesis and modifying enzymes                                                                           | 15 | -0.49624451930422  | -2.49899783893242 | 0.00591711 | 0.02590751 | 0.01540311 | 738  |
| 420 | Reactome: COPI-dependent Golgi-to-ER retrograde traffic                                                                         | 18 | -0.543931594949584 | -2.92900047020978 | 0.00645161 | 0.02714701 | 0.01614001 | 562  |
| 421 | Reactome: Golgi-to-ER retrograde transport                                                                                      | 18 | -0.543931594949584 | -2.92900047020978 | 0.00645161 | 0.02714701 | 0.01614001 | 562  |
| 422 | Reactome: ER to Golgi Anterograde Transport                                                                                     | 19 | -0.668349318525997 | -3.63480639602318 | 0.00724631 | 0.02971931 | 0.01766931 | 677  |
| 423 | Reactome: Collagen formation                                                                                                    | 19 | -0.376052276274213 | -2.04515390552825 | 0.00724631 | 0.02971931 | 0.01766931 | 738  |
| 424 | Reactome: Transport to the Golgi and subsequent modification                                                                    | 22 | -0.651668351870576 | -3.84685666573104 | 0.00813001 | 0.03252031 | 0.01933461 | 712  |
| 425 | Reactome: XBP1(S) activates chaperone genes                                                                                     | 10 | -0.541739185111768 | -2.05186979732798 | 0.00904971 | 0.03409441 | 0.02027061 | 677  |
| 426 | Reactome: IRE1alpha activates chaperones                                                                                        | 10 | -0.541739185111768 | -2.05186979732798 | 0.00904971 | 0.03409441 | 0.02027061 | 677  |
| 427 | Reactome: Post-translational protein phosphorylation                                                                            | 13 | -0.492702566683442 | -2.27035361120848 | 0.01030921 | 0.03704501 | 0.02202481 | 1022 |
| 428 | Reactome: Biosynthesis of the N-glycan precursor (dolichol lipid-linked oligosaccharide, LLO) and transfer to a nascent protein | 13 | -0.477634225639736 | -2.20091930171465 | 0.01030921 | 0.03704501 | 0.02202481 | 674  |
| 429 | Reactome: Intra-Golgi and retrograde Golgi-to-ER traffic                                                                        | 26 | -0.448623033556657 | -2.83076937818189 | 0.01063821 | 0.03706241 | 0.02203511 | 562  |
| 430 | Reactome: Metabolism of carbohydrates                                                                                           | 30 | -0.380804370914346 | -2.56969195608817 | 0.01282051 | 0.04282311 | 0.02546011 | 694  |
| 431 | Reactome: Diseases of metabolism                                                                                                | 38 | -0.27993550958653  | -2.12614991074165 | 0.01724131 | 0.05122521 | 0.03045551 | 678  |
| 432 | Reactome: Asparagine N-linked glycosylation                                                                                     | 46 | -0.583020161486996 | -4.77431653523144 | 0.02173911 | 0.06178481 | 0.03673371 | 712  |
